# Supplementary material
Source: PubMed Central journal article supplement (PMC5098623)
Supplement: pnas.1613246113.sapp.pdf [file pnas.1613246113.sapp.pdf]

# Supporting Information

## Targeting CYP2J for reducing paclitaxel-induced peripheral neuropathic pain

Marco Sisignano, Carlo Angioni, Chul-Kyu Park, Sascha Meyer Dos Santos, Di Liu, Holger Jordan, Maria Kuzikov, Di Liu, Sebastian Zinn, Stephan Hohman, Yannick Schreiber, Béla Zimmer, Mike Schmidt, Ruirui Lu, Jing Suo, Dong-Dong Zhang, Stephan MG Schäfer, Martine Hofmann, Ajay S Yekkirala, Natasja de Bruin, Michael J Parnham, Clifford J Woolf, Ru-Rong Ji, Klaus Scholich, and Gerd Geisslinger

Supplementary Tables: 3

Supplemental Figures: 14

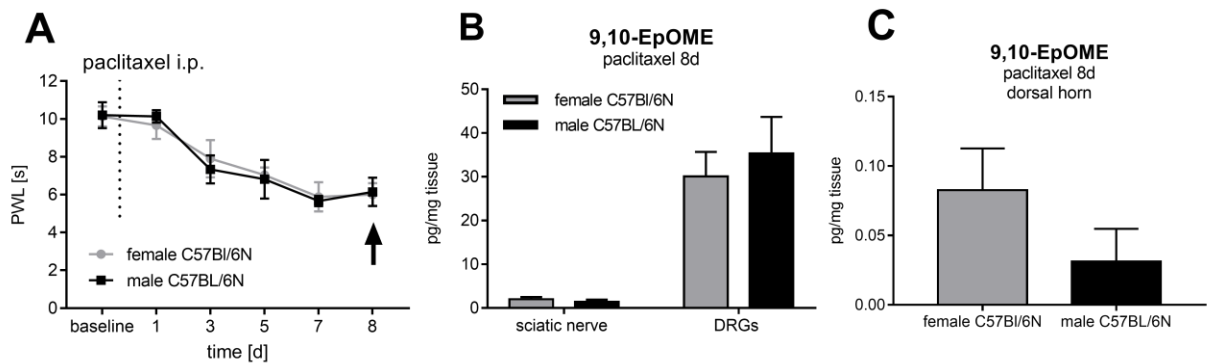

**Figure S1: Gender differences in paclitaxel-CIPN and 9,10-EpOME concentrations.**

(A) Mechanical thresholds of male (black) vs. female (grey) C57Bl6/N-mice eight days after paclitaxel treatment (6 mg/kg i.p.). At day eight, tissue was dissected (indicated with arrow) and 9,10-EpOME-concentrations were determined via LC-MS/MS. (B) Concentrations of 9,10-EpOME from male (black) vs. female (grey) C57Bl6/N-mice eight days after paclitaxel-injection (6 mg/kg i.p.). Concentrations were determined in sciatic nerve, lumbal DRGs (B) and the dorsal horn of the spinal cord (C). Data are shown as mean  $\pm$  SEM from n=6 mice per group.

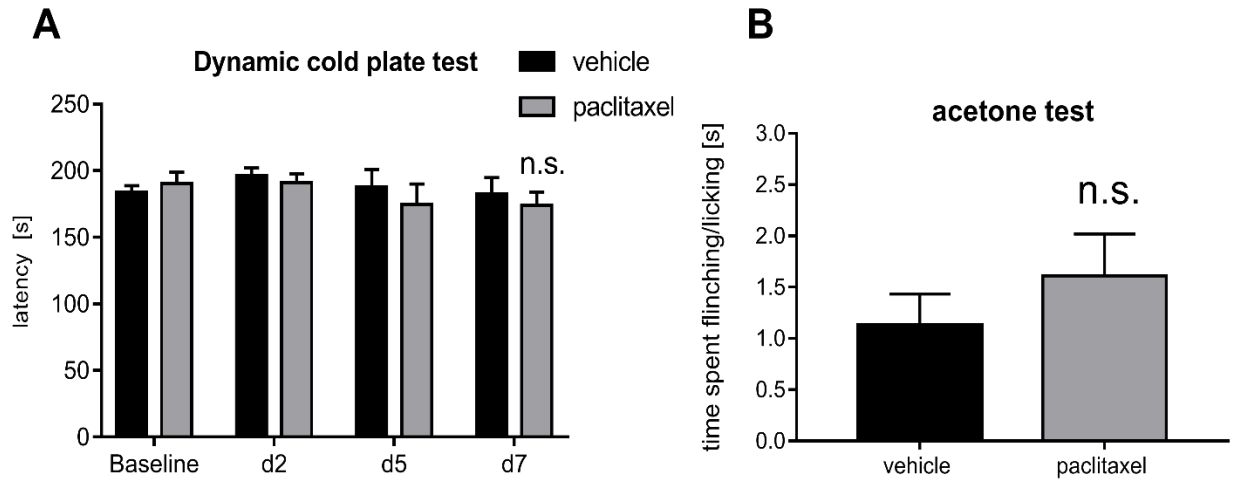

**Figure S2: Effects of telmisartan high-dose (6 mg/kg) on cold pain thresholds.** (A) Dynamic Cold plate test was performed using a decreasing temperature ramp from 25-0°C at 12°C/min. Cut-off time was set to 200s. Shown are latency times of wild-type C57BL/6N mice receiving vehicle (black bars) or paclitaxel (6 mg/kg i.p., grey bars). Dynamic cold plate test was performed on days 0, 2, 5 and 7 after injection. Data are presented as mean means  $\pm$  SEM from n=8 mice per group; n.s.: not significant, two-way ANOVA with Bonferroni's post-hoc test. (B) The acetone test was performed on day 8 after injection of vehicle or paclitaxel (6 mg/kg i.p.). Data are shown as mean means  $\pm$  SEM from n=8 mice per group; n.s.: not significant, two-way ANOVA with Bonferroni's post-hoc test.

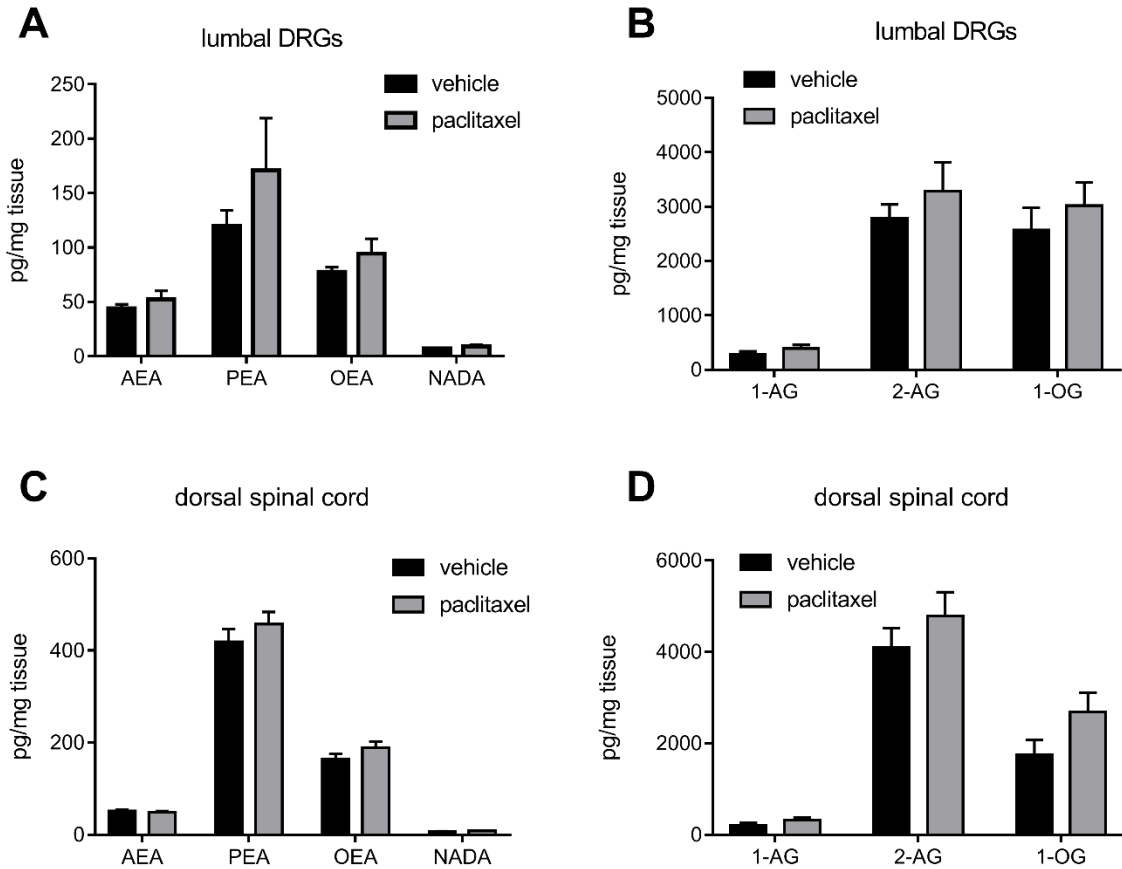

**Figure S3: Concentrations of endocannabinoids and endovanilloids eight days after injection of paclitaxel (6 mg/kg i.p.).** Concentrations of endocannabinoids anandamide (AEA), palmitoylethanolamide (PEA), oleoylethanolamide (OEA) and the endovanilloid N-arachidonoyl dopamine (NADA) in lumbar DRGs (**A**) or the dorsal spinal cord (**C**) eight days after treatment with vehicle (black) or paclitaxel (grey). Concentrations of the monoacylglycerols 1- and 2-arachidonoylglycerol (1-AG and 2-AG) as well as 1-oleoylglycerol (1-OG) in lumbar DRGs (**B**) or the dorsal spinal cord (**D**) eight days after treatment with vehicle (black) or paclitaxel (grey). Concentrations were determined with LC-MS/MS. Data are shown as mean  $\pm$  SEM from n=8 mice per group.

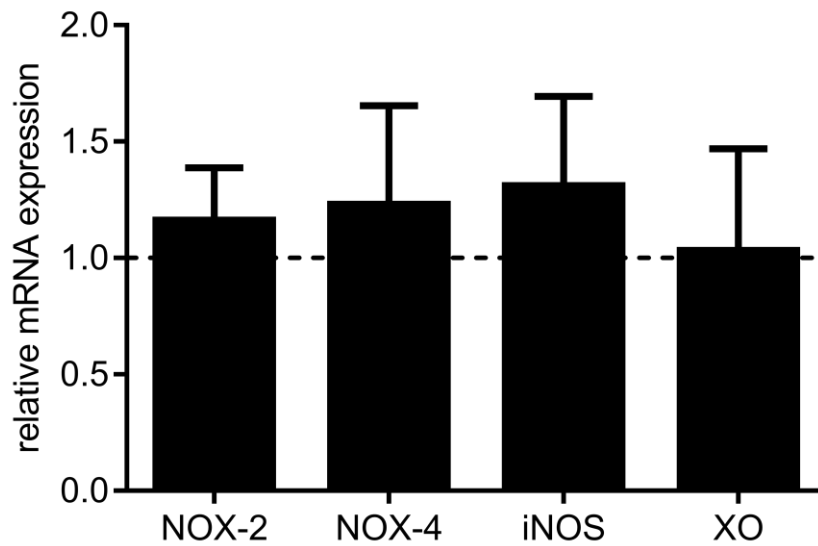

**Figure S4: Expression of NADPH-oxidases 2 and 4 (NOX-2 and NOX-4), inducible nitric oxide synthase (iNOS) and xanthine oxidase (XO) in DRGs eight days after paclitaxel treatment.** Relative expression levels are normalized to vehicle controls. Data are shown as  $\pm$  SEM from n=4-5 mice and analyzed with unpaired student's t-test.

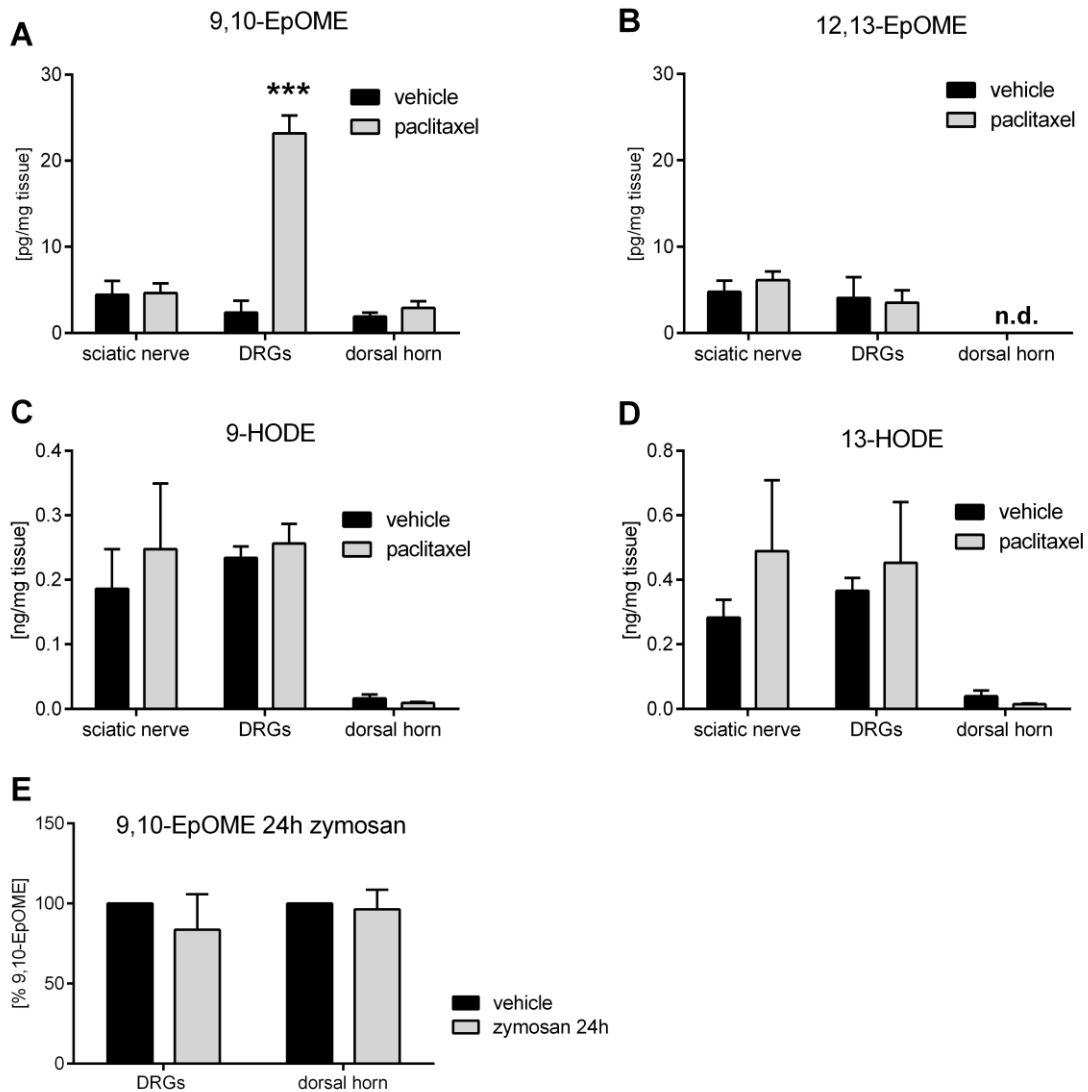

**Figure S5: Concentrations of the oxidized linoleic acid metabolites 24h after paclitaxel injection.** 9,10-EpOME (A), 12,13-EpOME (B), 9-HODE (C) and 13-HODE (D), in sciatic nerves, lumbar DRGs and the dorsal spinal cord of wild type mice, (6 mg/kg, grey bars). Concentration differences in 9,10-EpOME in lumbar DRGs, 24h after zymosan injection (12.5 mg · ml<sup>-1</sup>, 10 µl injection volume, grey bars) into the hind paw of wild type mice (E) shown for comparison. Data are means ± SEM from five individual mice per group, n.d.: not determined, \*\*\*p<0.001, one-way ANOVA.

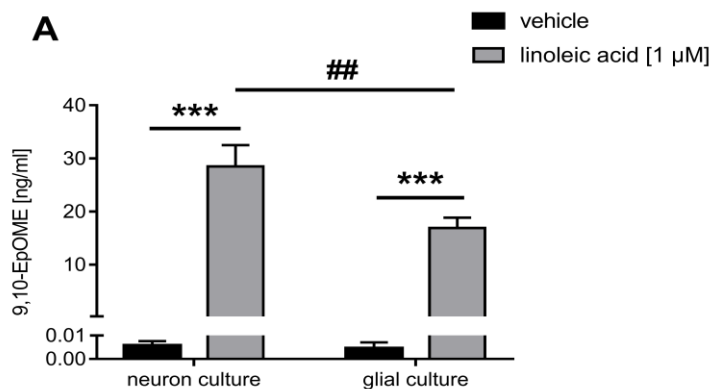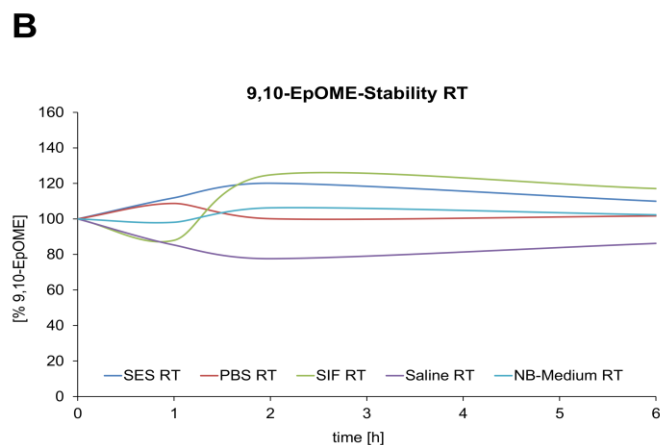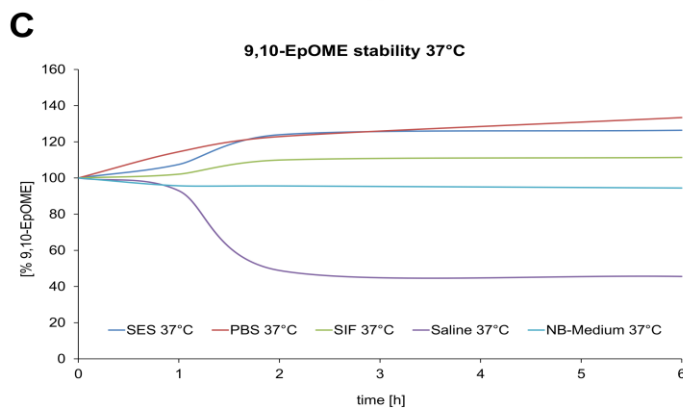

**Figure S6: Neuronal vs. Glial-production of 9,10-EpOME and *in vitro* stability of 9,10-EpOME in all buffers used throughout the whole study for up to six hours at room temperature (B) or at 37°C (C).** Neuron or glial cultures from n=4 individual mice were stimulated with linoleic acid (1  $\mu$ M, 1h, grey) or vehicle (black). EpOME-concentrations were determined by LC-MS/MS; ##p<0.01, \*\*\*p<0.001 Two-way ANOVA.

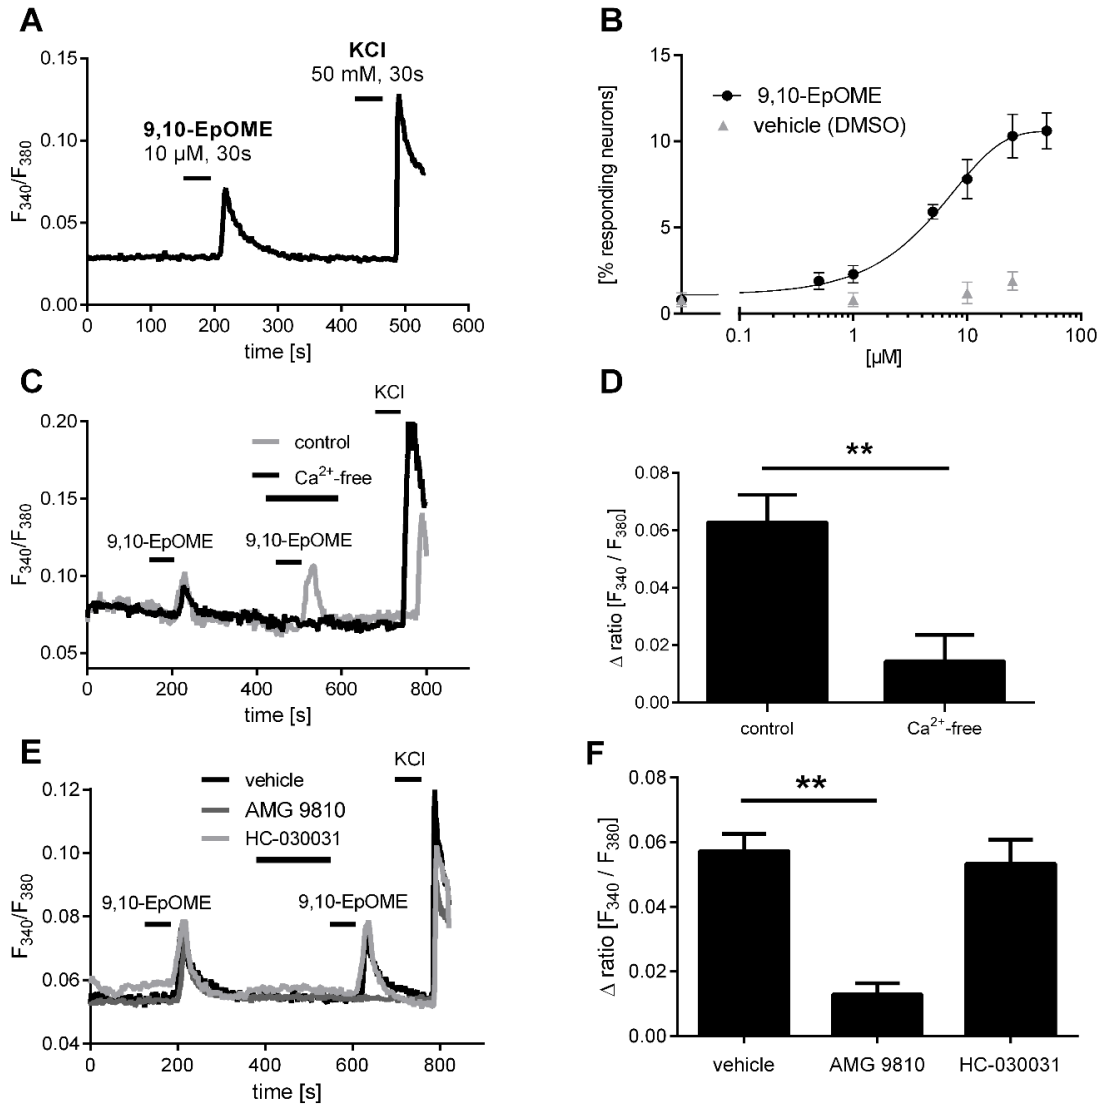

**Figure S7: Direct effects of 9,10-EpOME on sensory neurons.** 9,10-EpOME [ $> 5 \mu\text{M}$ ] causes calcium transients in up 10.3 % of DRG neurons (**A** and **B**), which can be blocked by calcium-free medium containing 2 mM EGTA (**C** and **D**) or by the presence of the selective TRPV1 antagonist, AMG9810 [ $1 \mu\text{M}$ ], but not the selective TRPA1 antagonist, HC-030031 [ $20 \mu\text{M}$ ] (**E** and **F**). Data represent the means  $\pm$  SEM of 16 (control), 31 (AMG 9810) or 18 (HC-030031) neurons;  $**p < 0.01$ , one-way ANOVA.



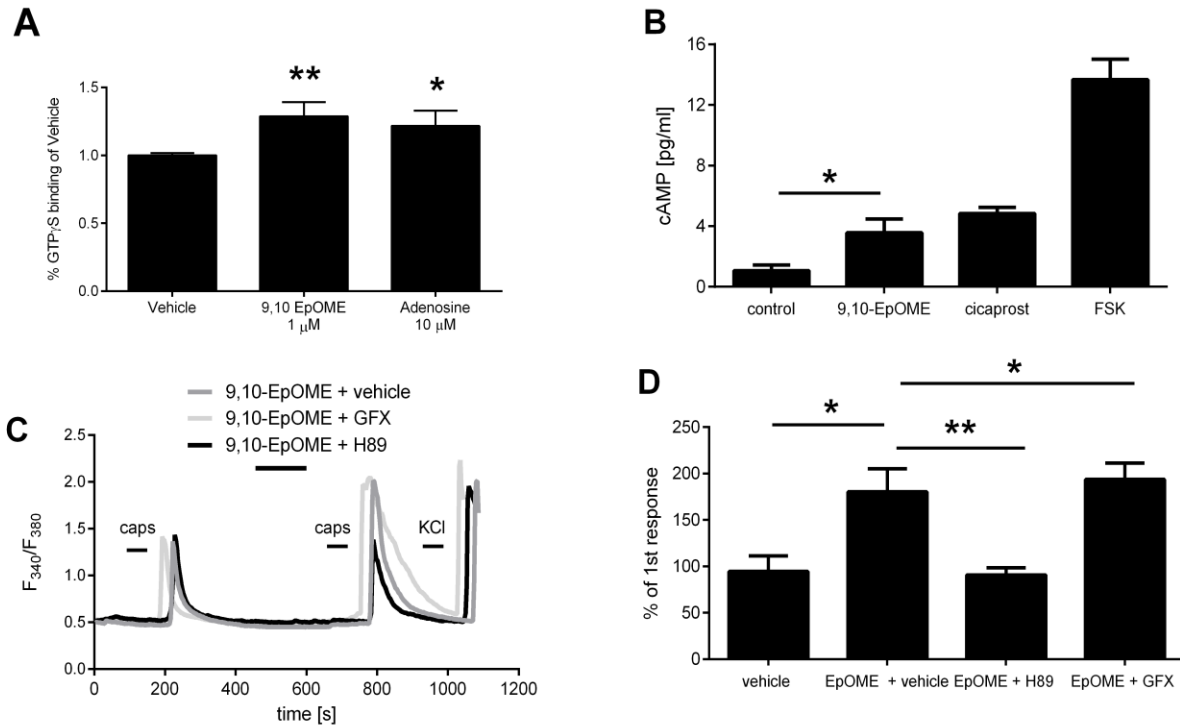

**Figure S8: Intracellular signaling of 9,10-EpOME.** [ $\gamma$ -<sup>35</sup>S]-GTP binding assays in membrane fractions of rat DRGs incubated for 30 minutes with GDP (30 μM) adenosine (10 μM), 9,10-EpOME (1 μM) or vehicle (DMSO 0.7% (v/v)). Data represent means of 3 measurements in membrane fractions from a total of 15 animals; \* $p < 0.05$ , \*\* $p < 0.01$ , Kruskal-Wallis test with Dunn's post hoc test (A). (B) Concentrations of cAMP in neuron-enriched DRG cultures after stimulation for 15 minutes with 9,10-EpOME, cicaprost or forskolin (FSK, 1 μM each). Data represent means  $\pm$  SEM of DRG cultures from five mice. (C and D) TRPV1 sensitization by 9,10-EpOME (1 μM, dark grey) after preincubation with a PKA inhibitor (H89 dihydrochloride, 20 μM for 1h, black) or a PKC inhibitor (GF 109203X (GFX), 1 μM for 1h, grey). (D) Statistical analysis of the results from (C). Data represent means  $\pm$  SEM of 15-39 neurons, \* $p < 0.05$ , \*\* $p < 0.01$ , one-way ANOVA; n.s. not significant.

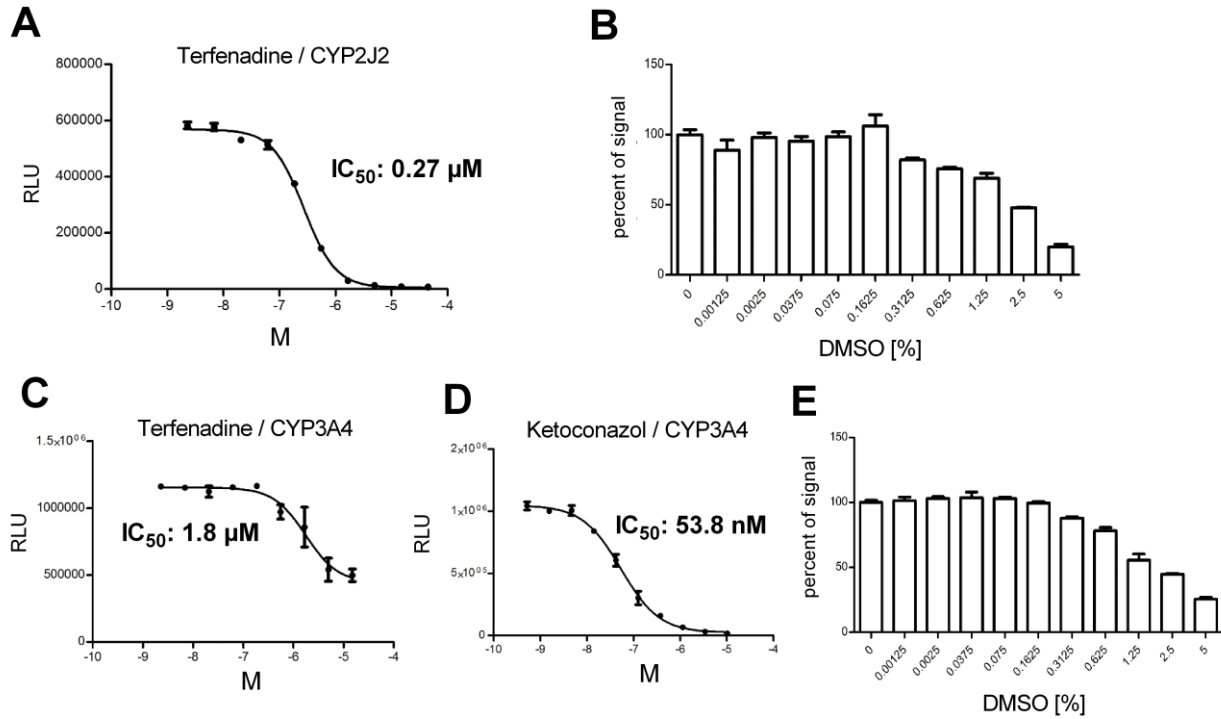

**Figure S9: Establishment of CYP2J2 and CYP3A4 inhibition screens with CYP-expressing supersomes using terfenadine (A and C) or ketoconazole (D) as positive controls.** Assays were tested for DMSO tolerance and were stable up to 0.5% DMSO (v/v) (B and E).

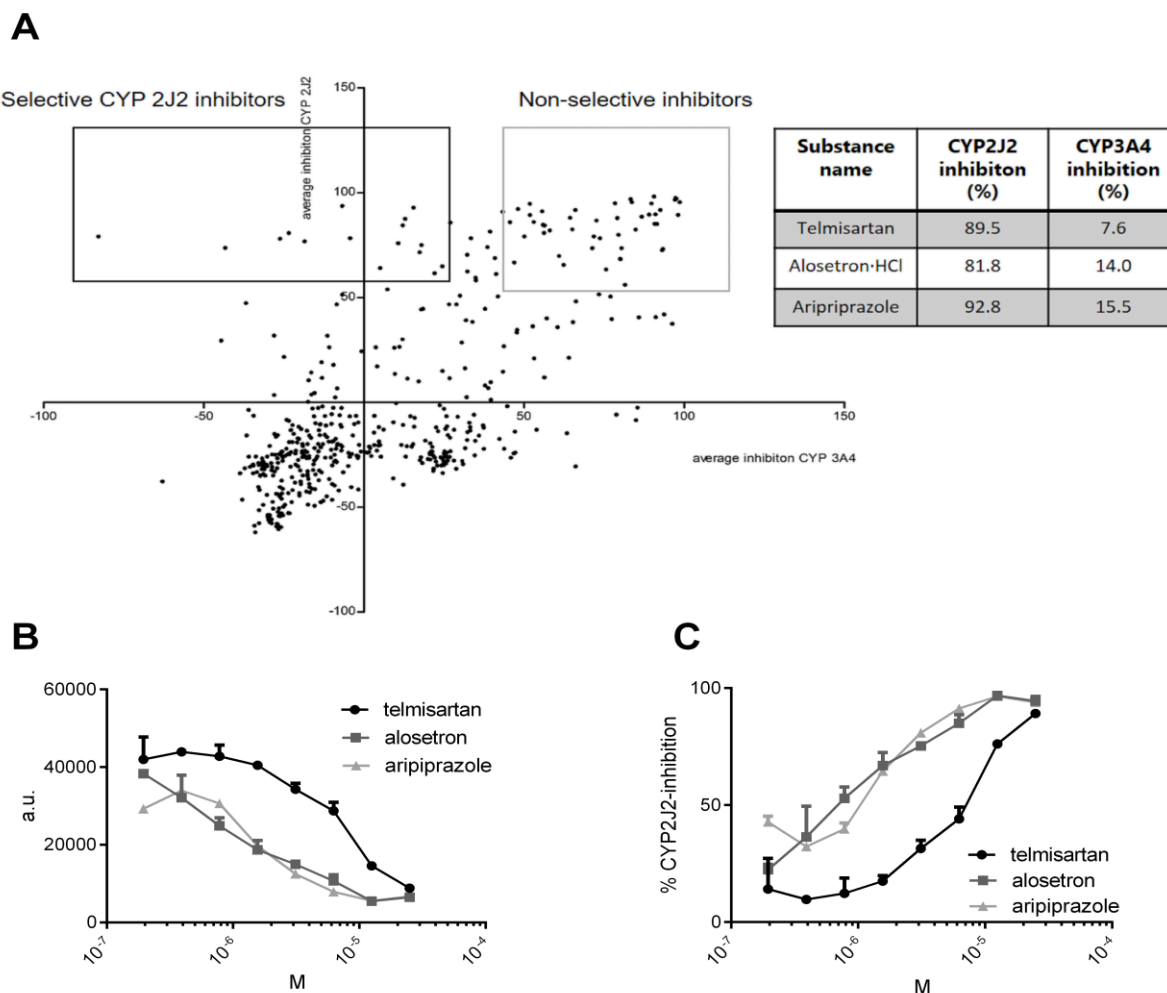

**Figure S10: Drug repurposing screen for CYP2J2 inhibitors.** (A) Correlation plot of calculated inhibition values of CYP2J2 and CYP3A4. Each dot in (A) represents an approved substance tested in the screen in duplicate at [10  $\mu$ M]. Substances with an CYP2J2 inhibition >60% and CYP3A4 inhibition <20% are highlighted in the black box. Unspecific substances are indicated in the grey box. Selected hits with high CYP2J2 inhibition and low CYP3A4 inhibition are shown in the table. Screening hits were validated with CYP2J2 overexpressing HEK-cells (B and C). Here, each concentration or substance was measured in triplicate.

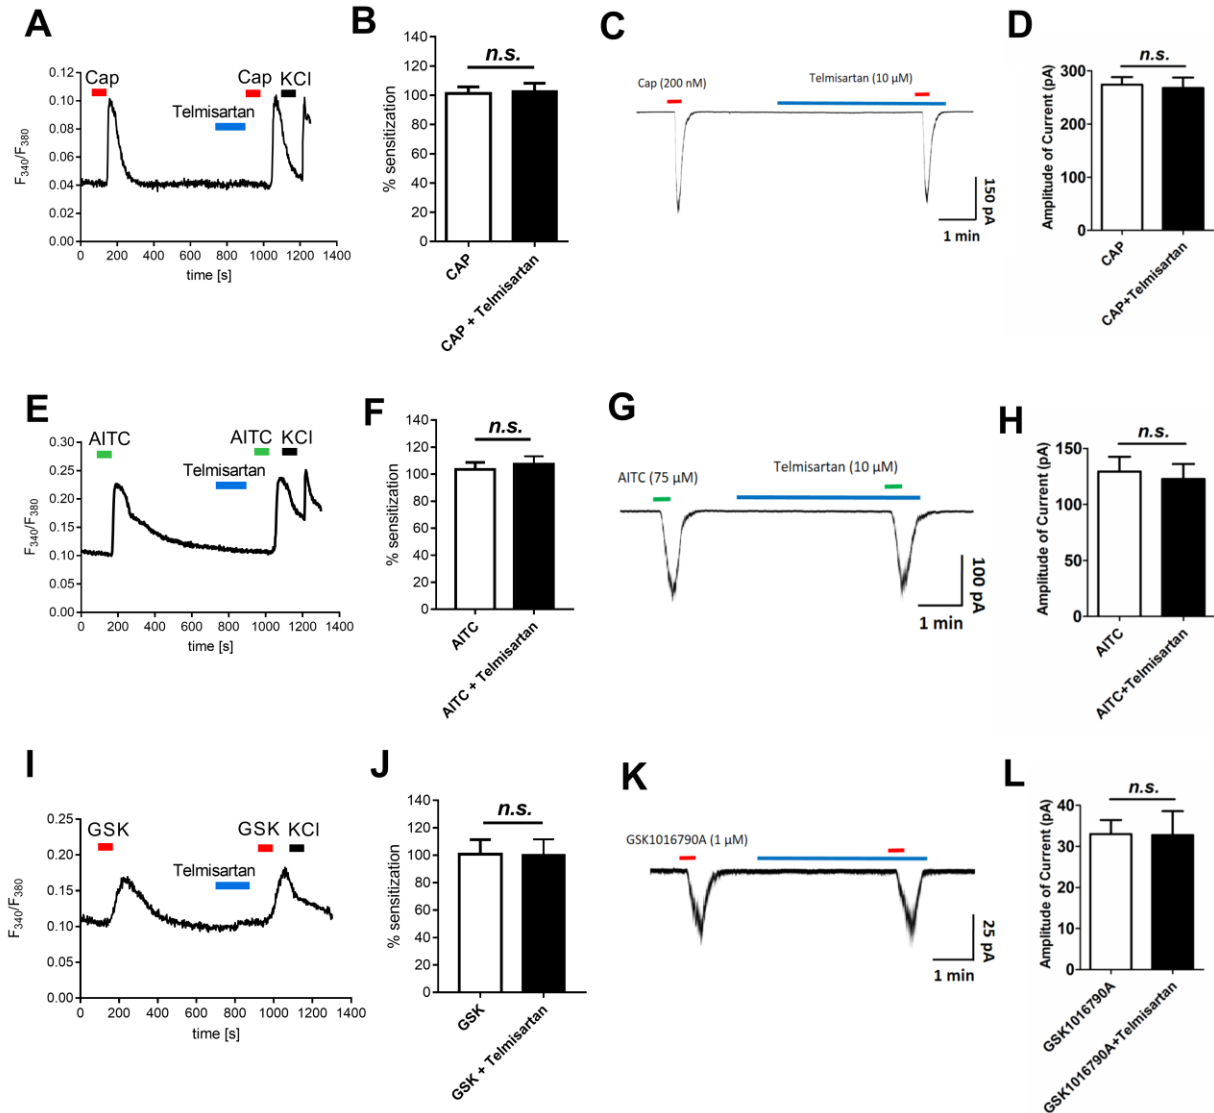

**Figure S11: Telmisartan does not affect TRPV1, TRPA1 or TRPV4.** Shown are two TRP channel responses of sensory neurons to selective agonists and in-between incubation with telmisartan [10  $\mu$ M]. The amplitudes of both responses were compared statistically with the student's t-test. (A, and B) Calcium-Imaging responses to the selective TRPV1 agonist capsaicin (Cap, 200 nM, 15s; n=30-44 neurons) and capsaicin evoked inward currents; n=11 neurons (C and D). (E and F) Calcium-influx after stimulation with the selective TRPA1 agonist AITC (allyl isothiocyanate, 75  $\mu$ M, 30s; n=41-

55 neurons) and inward currents of AITC stimulated neurons (n=10 neurons; G and H). (I and J) Responses of DRG cells to the selective TRPV4-agonist GSK1016790A (GSK, 1  $\mu$ M, 30s, n=50-51 cells) and inward currents of n=4 neurons stimulated with GSK (K and L). Notably, most TRPV4 responding cells were glial cells and only 10% of sensory neurons responded to the TRPV4 agonist GSK (4/40 neurons).

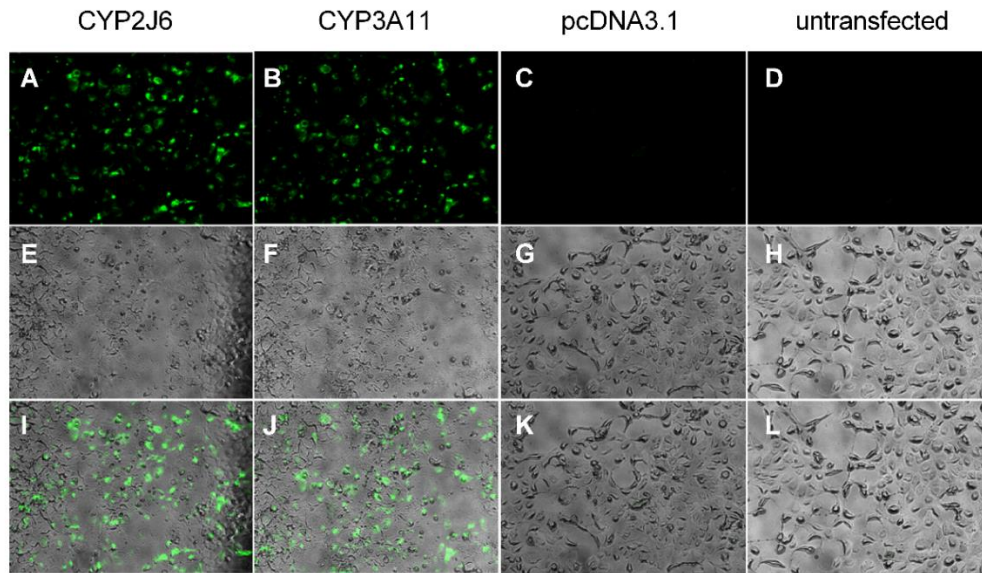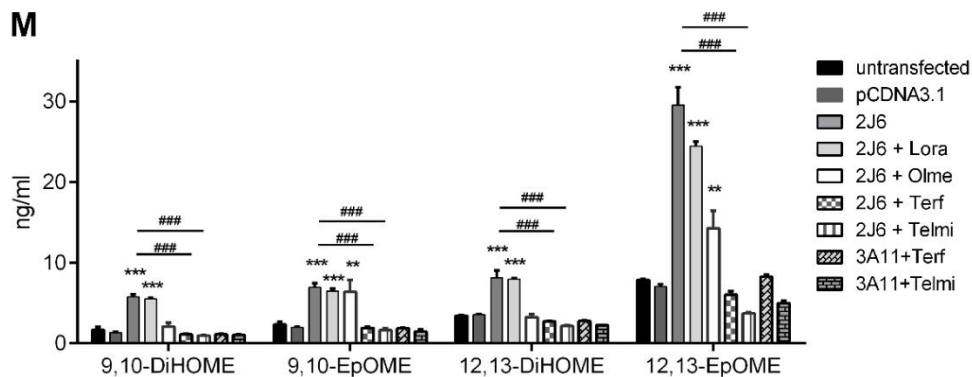

**Figure S12: Expression controls of CYPs in HEK-293 cells and lipid concentrations after stimulation with linoleic acid.** GFP expression in HEK-293 cells after transfection with CYP2J6 or CYP3A11 for 48h (A-I). (M) Concentrations of 9,10-EpOME,9,10-DiHOME, 12,13-EpOME and 12,13-DiHOME in supernatants of HEK-293 cells untransfected or transfected with pcDNA3.1, CYP2J6 or CYP3A11 for 48h and stimulated with linoleic acid (1  $\mu$ M, 1h) and either, 5  $\mu$ M terfenadine (terf), 5  $\mu$ M loratadine (lora), 10  $\mu$ M telmisartan (telmi) or 10  $\mu$ M olmesartan (olme). For each condition, three wells of a 6-well plate were used, data are shown as means  $\pm$  SEM; \*\*p<0.01, \*\*\*,###p<0.001, one way ANOVA.

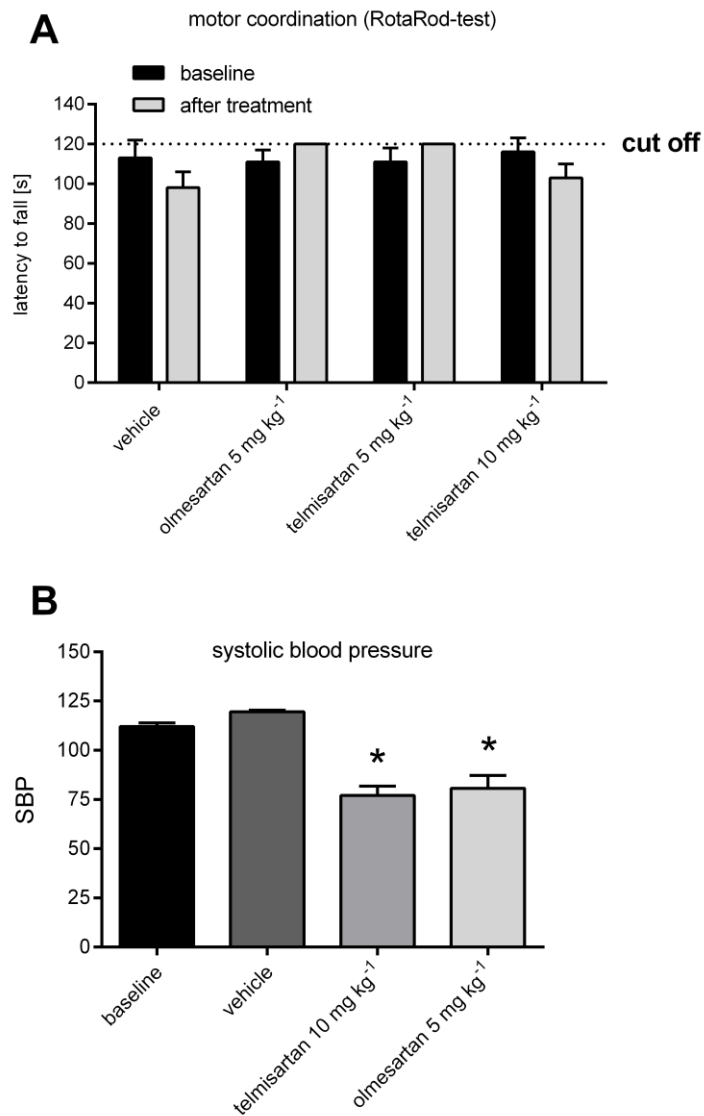

**Figure S13: Motor coordination and blood pressure in mice after treatment with telmaisartan.** (A) Motor coordination of wild type BL/6N mice tested in the RotaRod test at 16 rpm. The cut-off time was set at 120 seconds. (B) systolic blood pressure of wild type BL/6N mice. Mice were injected either vehicle, olmesartan (5 mg/kg i.p.), or telmisartan (5 or 10 mg/kg i.p. (A) or 10 mg/kg (B)) 2h before the measurement. Data are presented as means  $\pm$  SEM from 4-10 mice per group, \* $p < 0.05$  one-way ANOVA compared to baseline.

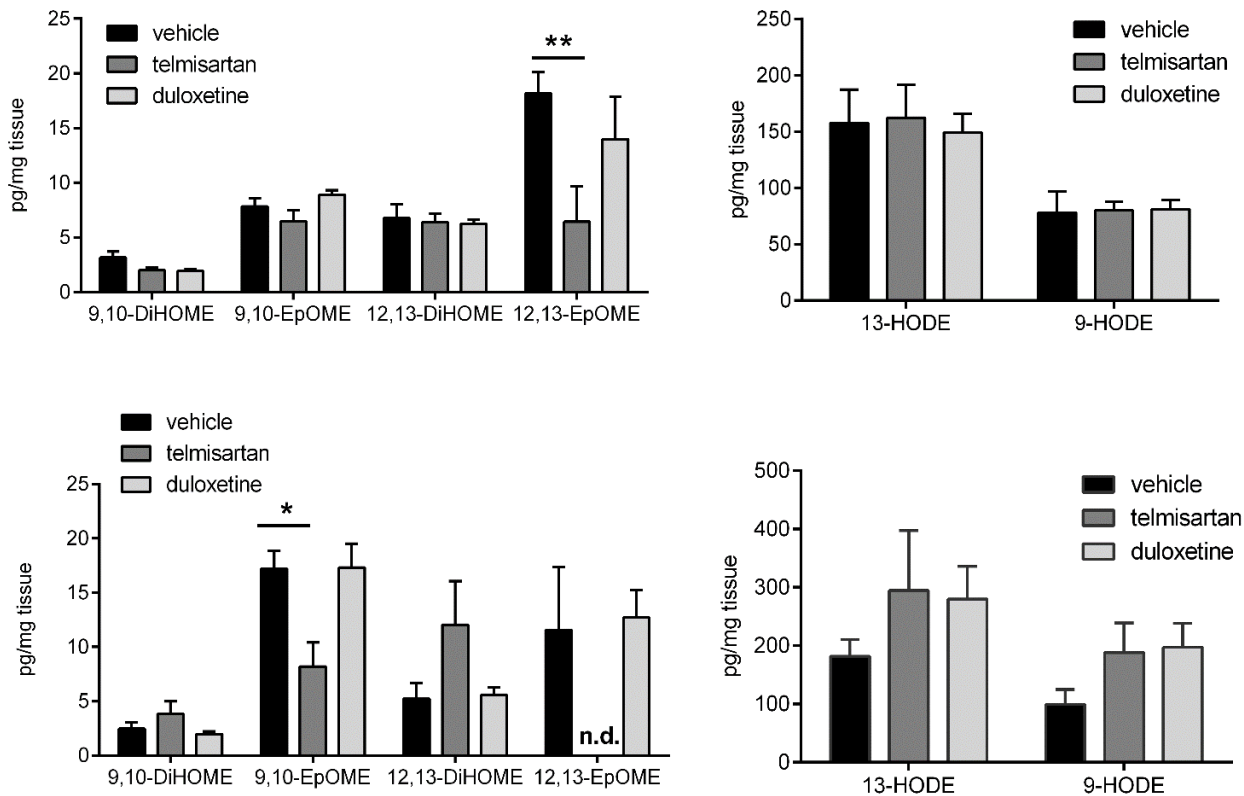

**Figure S14: OLAMs synthesis during PIPN after treatment with duloxetine or telmisartan.** Concentrations, of the oxidized linoleic acid metabolites, 9,10-EpOME, 12,13-EpOME, 9-HODE and 13-HODE in sciatic nerves (upper) and lumbar DRGs (lower) of wild type mice 8d after paclitaxel-injection (6 mg/kg), treated with telmisartan (5 mg/kg) or duloxetine (10 mg/kg) every second day. Data are shown as means  $\pm$  SEM from six individual mice per group, n.d.: not determined, \* $p < 0.05$ , \*\* $p < 0.01$ , one-way ANOVA.



**Table S1a: Lipid concentrations, 8d after paclitaxel injection, in sciatic nerves from wild type mice (n=6 per group), CYP: cytochrome P450-epoxygenase, LOX: lipoxygenase, COX: cyclooxygenase, PG: prostaglandin, LT: leukotriene.**

| sciatic nerve            | High dose paclitaxel (HD, 6 mg/kg) |      |             |      |         | Multiple low dose paclitaxel (MLD, 4 x 2 mg/kg) |      |             |      |         |
|--------------------------|------------------------------------|------|-------------|------|---------|-------------------------------------------------|------|-------------|------|---------|
|                          | vehicle                            |      | paclitaxel  |      | p-value | vehicle                                         |      | paclitaxel  |      | p-value |
|                          | pg lipid/mg                        | SEM  | pg lipid/mg | SEM  |         | pg lipid/mg                                     | SEM  | pg lipid/mg | SEM  |         |
| <b>CYP</b>               |                                    |      |             |      |         |                                                 |      |             |      |         |
| 9,10-EpOME               | 1.92                               | 0.61 | 2.8         | 0.60 | > 0.05  | 0.81                                            | 0.33 | 1.51        | 0.58 | > 0.05  |
| 9,10-DiHOME              | 3.94                               | 0.97 | 4.6         | 1.22 | > 0.05  | 4.22                                            | 0.61 | 4.4         | 0.54 | > 0.05  |
| 12,13-EpOME              | 11.8                               | 2.52 | 9.0         | 0.92 | > 0.05  | 17.3                                            | 3.40 | 19.2        | 2.99 | > 0.05  |
| 12,13-DiHOME             | 16.1                               | 1.91 | 18.0        | 2.27 | > 0.05  | 13.3                                            | 2.02 | 15.5        | 1.53 | > 0.05  |
| 9-HODE                   | 373.3                              | 56.1 | 118.9       | 26.5 | > 0.05  | 374.7                                           | 60.4 | 315.9       | 19.4 | > 0.05  |
| 13-HODE                  | 328.5                              | 65.4 | 334.7       | 35.0 | > 0.05  | 351.1                                           | 56.9 | 280.8       | 29.9 | > 0.05  |
| 14,15-EET                | 36.7                               | 9.3  | 39.1        | 10.2 | > 0.05  | n.d                                             | n.d  | n.d         | n.d  | n.d.    |
| <b>LOX</b>               |                                    |      |             |      |         |                                                 |      |             |      |         |
| 5-HETE                   | 32.5                               | 2.7  | 37.2        | 5.1  | > 0.05  | 40.4                                            | 12.9 | 46.9        | 6.0  | > 0.05  |
| 12-HETE                  | 9.6                                | 3.6  | 8.3         | 1.7  | > 0.05  | 5.3                                             | 0.9  | 4.4         | 0.9  | > 0.05  |
| 15-HETE                  | 225.0                              | 41.9 | 164.8       | 22.9 | > 0.05  | 130.4                                           | 32.1 | 97.4        | 9.9  | > 0.05  |
| 20-HETE                  | 13.6                               | 3.0  | 8.2         | 0.7  | > 0.05  | 10.7                                            | 0.3  | 10.7        | 1.1  | > 0.05  |
| LTB <sub>4</sub>         | 2.3                                | 0.5  | 1.6         | 0.3  | > 0.05  | n.d                                             | n.d  | n.d         | n.d  | n.d.    |
| <b>COX</b>               |                                    |      |             |      |         |                                                 |      |             |      |         |
| PGE <sub>2</sub>         | 93.4                               | 13.5 | 71.6        | 13.3 | > 0.05  | 66.8                                            | 16.8 | 69.2        | 11.2 | > 0.05  |
| PGD <sub>2</sub>         | 148.1                              | 28.5 | 74.1        | 20.2 | > 0.05  | 141.0                                           | 5.7  | 141.8       | 2.4  | > 0.05  |
| 6-keto-PGF <sub>1α</sub> | 56.9                               | 12.4 | 57.1        | 16.5 | > 0.05  | 39.3                                            | 8.2  | 44.0        | 4.9  | > 0.05  |
| PGF <sub>2α</sub>        | 30.1                               | 6.4  | 21.0        | 3.6  | > 0.05  | 18.6                                            | 3.1  | 21.4        | 2.5  | > 0.05  |
| TXB <sub>2</sub>         | 23.2                               | 6.3  | 24.7        | 4.4  | > 0.05  | 35.8                                            | 5.3  | 29.8        | 7.5  | > 0.05  |

**Table S1b: Lipid concentrations, 8d after paclitaxel injection, in lumbar DRGs from wild-type mice** (n=6 per group). Significant differences from vehicle are highlighted, n.d: not determined, \*p<0.05, \*\*p<0.01, one-way ANOVA.

| lumbar DRGs                    | High dose paclitaxel (HD, 6 mg/kg) |       |             |       |           | Multiple low dose paclitaxel (MLD, 4 x 2 mg/kg) |      |             |      |           |
|--------------------------------|------------------------------------|-------|-------------|-------|-----------|-------------------------------------------------|------|-------------|------|-----------|
|                                | vehicle                            |       | paclitaxel  |       | p-value   | vehicle                                         |      | paclitaxel  |      | p-value   |
|                                | pg lipid/mg                        | SEM   | pg lipid/mg | SEM   |           | pg lipid/mg                                     | SEM  | pg lipid/mg | SEM  |           |
| <b>CYP</b>                     |                                    |       |             |       |           |                                                 |      |             |      |           |
| <b>9,10-EpOME</b>              | 19.3                               | 5.1   | 41.5        | 5.4   | ** < 0.01 | 38.5                                            | 5.8  | 65.2        | 7.3  | * < 0.05  |
| <b>9,10-DiHOME</b>             | 16.5                               | 3.3   | 13.1        | 2.3   | > 0.05    | 12.8                                            | 1.7  | 11.3        | 0.8  | > 0.05    |
| <b>12,13-EpOME</b>             | 26.2                               | 5.5   | 34.8        | 8.0   | > 0.05    | 14.3                                            | 5.8  | 26.1        | 8.4  | > 0.05    |
| <b>12,13-DiHOME</b>            | 26.3                               | 2.4   | 24.5        | 2.3   | > 0.05    | 11.7                                            | 2.2  | 10.5        | 1.9  | > 0.05    |
| <b>9-HODE</b>                  | 227.4                              | 27.5  | 245.0       | 10.4  | > 0.05    | 218.8                                           | 31.7 | 181.3       | 15.2 | > 0.05    |
| <b>13-HODE</b>                 | 385.6                              | 47.6  | 446.5       | 32.8  | > 0.05    | 245.1                                           | 28.3 | 203.1       | 22.9 | > 0.05    |
| <b>14,15-EET</b>               | 2630.6                             | 511.1 | 3110.1      | 425.8 | > 0.05    | n.d                                             | n.d  | n.d         | n.d  | n.d.      |
| <b>LOX</b>                     |                                    |       |             |       |           |                                                 |      |             |      |           |
| <b>5-HETE</b>                  | 51.3                               | 10.1  | 35.5        | 6.0   | > 0.05    | 17.7                                            | 5.2  | 25.9        | 1.8  | > 0.05    |
| <b>12-HETE</b>                 | 24.5                               | 5.3   | 8.1         | 1.9   | ** < 0.01 | 26.3                                            | 8.9  | 41.3        | 13.5 | > 0.05    |
| <b>15-HETE</b>                 | 143.3                              | 14.5  | 102.0       | 8.8   | * < 0.05  | 91.1                                            | 19.1 | 96.5        | 2.9  | > 0.05    |
| <b>20-HETE</b>                 | 38.9                               | 5.2   | 32.7        | 2.8   | > 0.05    | 34.3                                            | 8.3  | 31.6        | 4.5  | > 0.05    |
| <b>LTB<sub>4</sub></b>         | 5.4                                | 1.2   | 3.7         | 0.9   | > 0.05    | n.d                                             | n.d  | n.d         | n.d  | n.d.      |
| <b>COX</b>                     |                                    |       |             |       |           |                                                 |      |             |      |           |
| <b>PGE<sub>2</sub></b>         | 321.6                              | 47.0  | 271.2       | 26.2  | > 0.05    | 311.2                                           | 43.1 | 242.1       | 56.0 | > 0.05    |
| <b>PGD<sub>2</sub></b>         | 639.4                              | 169.9 | 468.8       | 39.9  | > 0.05    | 342.7                                           | 37.7 | 273.3       | 50.5 | > 0.05    |
| <b>6-keto-PGF<sub>1α</sub></b> | 584.0                              | 33.1  | 465.1       | 29.1  | * < 0.05  | 608.2                                           | 34.7 | 319.5       | 45.7 | ** < 0.01 |
| <b>PGF<sub>2α</sub></b>        | 114.0                              | 17.2  | 85.6        | 16.3  | > 0.05    | 117.2                                           | 20.5 | 84.7        | 28.0 | > 0.05    |
| <b>TXB<sub>2</sub></b>         | 59.5                               | 5.8   | 71.0        | 8.9   | > 0.05    | 78.5                                            | 13.9 | 53.1        | 14.1 | > 0.05    |

**Table S1c: Lipid concentrations, 8d after paclitaxel injection, in the spinal dorsal horn from wild-type mice (n=6 per group). Significant differences from vehicle are highlighted, n.d: not determined, \*p<0.05, one-way ANOVA.**

| dorsal horn<br>day 8           | High dose paclitaxel (HD, 6 mg/kg) |      |             |      |          | Multiple low dose paclitaxel (MLD, 4 x 2 mg/kg) |      |             |      |         |
|--------------------------------|------------------------------------|------|-------------|------|----------|-------------------------------------------------|------|-------------|------|---------|
|                                | vehicle                            |      | paclitaxel  |      | p-value  | vehicle                                         |      | paclitaxel  |      | p-value |
|                                | pg lipid/mg                        | SEM  | pg lipid/mg | SEM  |          | pg lipid/mg                                     | SEM  | pg lipid/mg | SEM  |         |
| <b>CYP</b>                     |                                    |      |             |      |          |                                                 |      |             |      |         |
| <b>9,10-EpOME</b>              | n.d.                               | n.d. | n.d.        | n.d. | n.d.     | n.d.                                            | n.d. | n.d.        | n.d. | n.d.    |
| <b>9,10-DiHOME</b>             | 6.6                                | 0.8  | 5.8         | 1.1  | > 0.05   | 0.7                                             | 0.3  | 0.3         | 0.2  | > 0.05  |
| <b>12,13-EpOME</b>             | 8.0                                | 1.2  | 5.5         | 0.9  | > 0.05   | 6.3                                             | 1.4  | 5.6         | 1.3  | > 0.05  |
| <b>12,13-DiHOME</b>            | 1.3                                | 0.6  | 1.6         | 0.7  | > 0.05   | 2.6                                             | 0.7  | 2.5         | 0.2  | > 0.05  |
| <b>9-HODE</b>                  | 58.0                               | 11.8 | 42.7        | 7.1  | > 0.05   | 41.3                                            | 5.6  | 40.5        | 4.9  | > 0.05  |
| <b>13-HODE</b>                 | 80.3                               | 16.7 | 66.3        | 12.4 | > 0.05   | 64.3                                            | 7.4  | 57.0        | 4.2  | > 0.05  |
| <b>14,15-EET</b>               | 231.8                              | 55.2 | 271.3       | 65.0 | > 0.05   | n.d.                                            | n.d. | n.d.        | n.d. | n.d.    |
| <b>LOX</b>                     |                                    |      |             |      |          |                                                 |      |             |      |         |
| <b>5-HETE</b>                  | 18.7                               | 5.3  | 17.3        | 2.6  | > 0.05   | 4.3                                             | 0.5  | 4.3         | 0.8  | > 0.05  |
| <b>12-HETE</b>                 | 10.5                               | 3.6  | 2.9         | 0.8  | * < 0.05 | 14.8                                            | 2.3  | 10.9        | 3.2  | > 0.05  |
| <b>15-HETE</b>                 | 35.6                               | 3.7  | 27.3        | 4.4  | > 0.05   | 29.6                                            | 3.3  | 30.3        | 6.3  | > 0.05  |
| <b>20-HETE</b>                 | 3.9                                | 0.8  | 5.0         | 0.8  | > 0.05   | 1.3                                             | 0.1  | 1.6         | 0.5  | > 0.05  |
| <b>LTB<sub>4</sub></b>         | 7.2                                | 2.4  | 4.7         | 0.8  | > 0.05   | n.d.                                            | n.d. | n.d.        | n.d. | n.d.    |
| <b>COX</b>                     |                                    |      |             |      |          |                                                 |      |             |      |         |
| <b>PGE<sub>2</sub></b>         | 78.2                               | 23.2 | 70.8        | 6.7  | > 0.05   | 121.4                                           | 27.6 | 173.3       | 25.9 | > 0.05  |
| <b>PGD<sub>2</sub></b>         | 243.8                              | 65.2 | 355.9       | 55.2 | > 0.05   | 174.0                                           | 41.7 | 251.1       | 44.9 | > 0.05  |
| <b>6-keto-PGF<sub>1α</sub></b> | 62.7                               | 29.7 | 124.9       | 38.9 | > 0.05   | 66.3                                            | 44.1 | 116.2       | 55.8 | > 0.05  |
| <b>PGF<sub>2α</sub></b>        | 130.3                              | 49.4 | 195.5       | 16.6 | > 0.05   | 117.2                                           | 19.1 | 144.9       | 48.3 | > 0.05  |
| <b>TXB<sub>2</sub></b>         | 93.4                               | 17.9 | 102.2       | 11.6 | > 0.05   | 73.3                                            | 15.9 | 100.2       | 13.6 | > 0.05  |

**Table S1d: Endocannabinoid/endovanilloid concentrations, 8d after paclitaxel injection, in lumbar DRGs (left) and the spinal dorsal horn (right) from wild-type mice (n=8 per group). AEA: anandamide, PEA: palmitoylethanolamide, OEA: oleoylethanolamide, NADA: N-arachidonoyl dopamine, 1-AG and 2-AG: 1- and 2-arachidonoylglycerol, 1-OG: 1-oleoylglycerol. Data were analyzed with One-way ANOVA.**

|                          | lumbar DRGs |       |                   |       |         | spinal dorsal horn |       |                   |       |         |
|--------------------------|-------------|-------|-------------------|-------|---------|--------------------|-------|-------------------|-------|---------|
|                          | vehicle     |       | paclitaxel 6mg/kg |       | p-value | vehicle            |       | paclitaxel 6mg/kg |       | p-value |
|                          | pg lipid/mg | SEM   | pg lipid/mg       | SEM   |         | pg lipid/mg        | SEM   | pg lipid/mg       | SEM   |         |
| <b>Ethanol-amides</b>    |             |       |                   |       |         |                    |       |                   |       |         |
| AEA                      | 44.1        | 3.63  | 52.4              | 0.60  | > 0.05  | 51.6               | 2.72  | 49.1              | 2.02  | > 0.05  |
| PEA                      | 119.8       | 14.3  | 170.8             | 1.22  | > 0.05  | 418.6              | 28.3  | 457.1             | 26.4  | > 0.05  |
| OEA                      | 77.7        | 4.17  | 94.3              | 0.92  | > 0.05  | 163.8              | 11.2  | 188.7             | 13.7  | > 0.05  |
| <b>Endo-vanilloid</b>    |             |       |                   |       |         |                    |       |                   |       |         |
| NADA                     | 7.1         | 0.75  | 9.0               | 5.1   | > 0.05  | 6.9                | 0.64  | 8.2               | 1.06  | > 0.05  |
| <b>Monoacylglycerols</b> |             |       |                   |       |         |                    |       |                   |       |         |
| 1-AG                     | 276.6       | 63.5  | 389.7             | 65.2  | > 0.05  | 213.6              | 46.4  | 324.4             | 49.0  | > 0.05  |
| 2-AG                     | 2781.4      | 257.5 | 3285.4            | 530.0 | > 0.05  | 4096.4             | 426.7 | 4785.2            | 523.8 | > 0.05  |
| 1-OG                     | 2567.4      | 415.8 | 3020.5            | 424.6 | > 0.05  | 1757.9             | 315.3 | 2687.4            | 424.6 | > 0.05  |

**Table S2a: Lipid concentrations, 8d after paclitaxel injection, in sciatic nerves from wild type mice following administration of terfenadine, loratadine, telmisartan or olmesartan for two hours (n=6 per group). CYP: cytochrome P450-epoxygenase, LOX: lipoxygenase, COX: cyclooxygenase, PG: prostaglandin, LT: leukotriene. Significant differences from vehicle are highlighted, \*p<0.05, one-way ANOVA.**

| sciatic nerve            | High dose paclitaxel (HD, 6 mg/kg) 8d |      |                                              |       |         |                                             |      |         |                                              |      |         |                                             |      |          |
|--------------------------|---------------------------------------|------|----------------------------------------------|-------|---------|---------------------------------------------|------|---------|----------------------------------------------|------|---------|---------------------------------------------|------|----------|
|                          | vehicle 2h i.p.                       |      | terfenadine 1 mg · kg <sup>-1</sup> i.p., 2h |       | p-value | loratadine 1 mg · kg <sup>-1</sup> i.p., 2h |      | p-value | telmisartan 5 mg · kg <sup>-1</sup> i.p., 2h |      | p-value | olmesartan 5 mg · kg <sup>-1</sup> i.p., 2h |      | p-value  |
|                          | pg lipid/mg                           | SEM  | pg lipid/mg                                  | SEM   |         | pg lipid/mg                                 | SEM  |         | pg lipid/mg                                  | SEM  |         | pg lipid/mg                                 | SEM  |          |
| <b>CYP</b>               |                                       |      |                                              |       |         |                                             |      |         |                                              |      |         |                                             |      |          |
| 9,10-EpOME               | 2.29                                  | 0.43 | 2.8                                          | 1.15  | > 0.05  | 2.61                                        | 0.69 | > 0.05  | 4.46                                         | 1.5  | > 0.05  | 3.44                                        | 0.74 | > 0.05   |
| 9,10-DiHOME              | 3.69                                  | 1.56 | 2.97                                         | 0.83  | > 0.05  | 2.98                                        | 0.66 | > 0.05  | 5.48                                         | 1.72 | > 0.05  | 3.01                                        | 0.39 | > 0.05   |
| 12,13-EpOME              | 8.39                                  | 2.71 | 12.7                                         | 2.09  | > 0.05  | 5.52                                        | 1.71 | > 0.05  | 8.68                                         | 1.34 | > 0.05  | 8.32                                        | 2.03 | > 0.05   |
| 12,13-DiHOME             | 28                                    | 6.35 | 20.1                                         | 4.17  | > 0.05  | 18.6                                        | 2.63 | > 0.05  | 22.2                                         | 2.96 | > 0.05  | 12.7                                        | 3.85 | * < 0.05 |
| 9-HODE                   | 338.2                                 | 56.6 | 288.3                                        | 46.5  | > 0.05  | 390.8                                       | 26.7 | > 0.05  | 266                                          | 62.6 | > 0.05  | 297.3                                       | 31.4 | > 0.05   |
| 13-HODE                  | 383.7                                 | 73.1 | 345.8                                        | 33.2  | > 0.05  | 387.1                                       | 24.3 | > 0.05  | 294.3                                        | 58.7 | > 0.05  | 389.7                                       | 31.9 | > 0.05   |
| 14,15-EET                | 33.4                                  | 8.39 | 22.8                                         | 5.4   | > 0.05  | 24.7                                        | 1.84 | > 0.05  | 24.1                                         | 4.22 | > 0.05  | 41.9                                        | 11.3 | > 0.05   |
| <b>LOX</b>               |                                       |      |                                              |       |         |                                             |      |         |                                              |      |         |                                             |      |          |
| 5-HETE                   | 27.8                                  | 5.83 | 37.9                                         | 6.19  | > 0.05  | 32.7                                        | 5.41 | > 0.05  | 33.2                                         | 3.06 | > 0.05  | 33.4                                        | 4.36 | > 0.05   |
| 12-HETE                  | 8.73                                  | 2.44 | 5.09                                         | 1.31  | > 0.05  | 12.1                                        | 1.11 | > 0.05  | 7.41                                         | 1.36 | > 0.05  | 6.30                                        | 1.41 | > 0.05   |
| 15-HETE                  | 158.4                                 | 39.9 | 203.6                                        | 48.3  | > 0.05  | 188.3                                       | 21.4 | > 0.05  | 189.7                                        | 38.3 | > 0.05  | 181.4                                       | 21.4 | > 0.05   |
| 20-HETE                  | 16.8                                  | 1.47 | 19.8                                         | 2.63  | > 0.05  | 20.2                                        | 2.56 | > 0.05  | 11.0                                         | 2.71 | > 0.05  | 16.5                                        | 1.11 | > 0.05   |
| LTB <sub>4</sub>         | 1.67                                  | 0.63 | 2.05                                         | 0.61  | > 0.05  | 2.73                                        | 0.82 | > 0.05  | 0.99                                         | 0.34 | > 0.05  | 1.91                                        | 0.27 | > 0.05   |
| <b>COX</b>               |                                       |      |                                              |       |         |                                             |      |         |                                              |      |         |                                             |      |          |
| PGE <sub>2</sub>         | 59.5                                  | 5.60 | 80.9                                         | 21.8  | > 0.05  | 71.2                                        | 8.31 | > 0.05  | 81.0                                         | 19.4 | > 0.05  | 73.2                                        | 13.7 | > 0.05   |
| PGD <sub>2</sub>         | 42.1                                  | 9.39 | 60.8                                         | 7.97  | > 0.05  | 52.8                                        | 6.33 | > 0.05  | 72.3                                         | 5.3  | > 0.05  | 28.6                                        | 9.24 | > 0.05   |
| 6-keto-PGF <sub>1α</sub> | 45.5                                  | 2.59 | 74.5                                         | 31.5  | > 0.05  | 38.4                                        | 7.20 | > 0.05  | 61.8                                         | 4.8  | > 0.05  | 48.7                                        | 1.52 | > 0.05   |
| PGF <sub>2α</sub>        | 18.8                                  | 3.41 | 27.8                                         | 11.03 | > 0.05  | 25.5                                        | 5.04 | > 0.05  | 20.7                                         | 2.1  | > 0.05  | 16.8                                        | 5.23 | > 0.05   |
| TXB <sub>2</sub>         | 35.6                                  | 12.2 | 34.4                                         | 14.1  | > 0.05  | 28.9                                        | 4.11 | > 0.05  | 33.2                                         | 1.6  | > 0.05  | 15.9                                        | 3.15 | * < 0.05 |

**Table S2b: Lipid concentrations, 8d after paclitaxel injection, in lumbar DRGs from wild type mice following administration of terfenadine, loratadine, telmisartan or olmesartan for two hours (n=6 per group). Significant differences from vehicle are highlighted, \*p<0.05, one-way ANOVA.**

| lumbar DRGs              | High dose paclitaxel (HD, 6 mg/kg) 8d |       |                                              |       |          |                                             |       |         |                                              |      |          |                                             |       |         |
|--------------------------|---------------------------------------|-------|----------------------------------------------|-------|----------|---------------------------------------------|-------|---------|----------------------------------------------|------|----------|---------------------------------------------|-------|---------|
|                          | vehicle 2h i.p.                       |       | terfenadine 1 mg · kg <sup>-1</sup> i.p., 2h |       | p-value  | loratadine 1 mg · kg <sup>-1</sup> i.p., 2h |       | p-value | telmisartan 5 mg · kg <sup>-1</sup> i.p., 2h |      | p-value  | olmesartan 5 mg · kg <sup>-1</sup> i.p., 2h |       | p-value |
|                          | pg lipid/mg                           | SEM   | pg lipid/mg                                  | SEM   |          | pg lipid/mg                                 | SEM   |         | pg lipid/mg                                  | SEM  |          | pg lipid/mg                                 | SEM   |         |
| <b>CYP</b>               |                                       |       |                                              |       |          |                                             |       |         |                                              |      |          |                                             |       |         |
| 9,10-EpOME               | 11.2                                  | 1.5   | 4.89                                         | 0.83  | * < 0.05 | 10.4                                        | 1.99  | > 0.05  | 5.61                                         | 0.96 | * < 0.05 | 9.8                                         | 2.16  | > 0.05  |
| 9,10-DiHOME              | 6.9                                   | 0.65  | 5.38                                         | 1.44  | > 0.05   | 5.55                                        | 0.67  | > 0.05  | n.d                                          | n.d  | n.d      | 5.55                                        | 0.69  | > 0.05  |
| 12,13-EpOME              | 13.35                                 | 1.41  | 9.03                                         | 0.31  | * < 0.05 | 15.4                                        | 2.25  | > 0.05  | 12.86                                        | 1.55 | > 0.05   | 13.03                                       | 0.42  | > 0.05  |
| 12,13-DiHOME             | 24.9                                  | 3.4   | 19.4                                         | 2.91  | > 0.05   | 17.8                                        | 6.64  | > 0.05  | 20.1                                         | 1.11 | > 0.05   | 15.7                                        | 6.88  | > 0.05  |
| 9-HODE                   | 630.5                                 | 95.2  | 567.5                                        | 78.0  | > 0.05   | 611.0                                       | 109.5 | > 0.05  | 193.4                                        | 12.8 | * < 0.05 | 502.4                                       | 81.5  | > 0.05  |
| 13-HODE                  | 784.3                                 | 171.1 | 585.8                                        | 78.1  | > 0.05   | 967.2                                       | 185.6 | > 0.05  | 279.9                                        | 22.7 | * < 0.05 | 967.2                                       | 227.6 | > 0.05  |
| 14,15-EET                | 211.5                                 | 44.8  | 232.8                                        | 47.7  | > 0.05   | 202                                         | 21.9  | > 0.05  | 188.1                                        | 23.2 | > 0.05   | 223.9                                       | 33.1  | > 0.05  |
| <b>LOX</b>               |                                       |       |                                              |       |          |                                             |       |         |                                              |      |          |                                             |       |         |
| 5-HETE                   | 41.8                                  | 4.84  | 31.7                                         | 7.44  | > 0.05   | 33.0                                        | 6.53  | > 0.05  | 46.3                                         | 41.9 | > 0.05   | 39.8                                        | 3.96  | > 0.05  |
| 12-HETE                  | 7.79                                  | 1.92  | 6.19                                         | 1.03  | > 0.05   | 9.44                                        | 1.21  | > 0.05  | 12.1                                         | 2.32 | > 0.05   | 11.4                                        | 2.06  | > 0.05  |
| 15-HETE                  | 119.8                                 | 13.1  | 114.5                                        | 11.5  | > 0.05   | 104.2                                       | 20.9  | > 0.05  | 123.9                                        | 9.72 | > 0.05   | 108.6                                       | 12.0  | > 0.05  |
| 20-HETE                  | 33.3                                  | 8.10  | 48.6                                         | 9.86  | > 0.05   | 38.8                                        | 4.24  | > 0.05  | 36.3                                         | 2.73 | > 0.05   | 27.9                                        | 4.23  | > 0.05  |
| LTB <sub>4</sub>         | 3.90                                  | 0.79  | 3.35                                         | 0.47  | > 0.05   | 4.12                                        | 1.16  | > 0.05  | 5.05                                         | 1.13 | > 0.05   | 3.38                                        | 0.58  | > 0.05  |
| <b>COX</b>               |                                       |       |                                              |       |          |                                             |       |         |                                              |      |          |                                             |       |         |
| PGE <sub>2</sub>         | 208.6                                 | 101.9 | 374.7                                        | 77.2  | > 0.05   | 289.6                                       | 44.3  | > 0.05  | 242.9                                        | 23.9 | > 0.05   | 330.1                                       | 8.79  | > 0.05  |
| PGD <sub>2</sub>         | 270.5                                 | 65.4  | 360.3                                        | 81.9  | > 0.05   | 277.1                                       | 50.2  | > 0.05  | 328.2                                        | 23.8 | > 0.05   | 389.4                                       | 70.9  | > 0.05  |
| 6-keto-PGF <sub>1α</sub> | 555.6                                 | 219.9 | 814.3                                        | 114.3 | > 0.05   | 661.5                                       | 97.4  | > 0.05  | 594.9                                        | 11.3 | > 0.05   | 615.5                                       | 25.5  | > 0.05  |
| PGF <sub>2α</sub>        | 51.9                                  | 17.2  | 85.8                                         | 27.9  | > 0.05   | 77.3                                        | 26.3  | > 0.05  | 67.4                                         | 4.44 | > 0.05   | 86.5                                        | 31.4  | > 0.05  |
| TXB <sub>2</sub>         | 87.6                                  | 23.3  | 147.7                                        | 34.2  | > 0.05   | 76.1                                        | 21.0  | > 0.05  | 81.8                                         | 30.6 | > 0.05   | 112.7                                       | 15.2  | > 0.05  |

**Table S2c: Lipid concentrations, 8d after paclitaxel injection, in the spinal dorsal horn from wild type mice following administration of terfenadine, loraratadine, telmisartan or olmesartan for two hours (n=6 per group). Significant differences to vehicle are highlighted, \*p<0.05, one-way ANOVA.**

| dorsal horn              | High dose paclitaxel (HD, 6 mg/kg) 8d |      |                                              |      |          |                                             |      |         |                                              |      |         |                                             |      |         |
|--------------------------|---------------------------------------|------|----------------------------------------------|------|----------|---------------------------------------------|------|---------|----------------------------------------------|------|---------|---------------------------------------------|------|---------|
|                          | vehicle 2h i.p.                       |      | terfenadine 1 mg · kg <sup>-1</sup> i.p., 2h |      | p-value  | loratidine 1 mg · kg <sup>-1</sup> i.p., 2h |      | p-value | telmisartan 5 mg · kg <sup>-1</sup> i.p., 2h |      | p-value | olmesartan 5 mg · kg <sup>-1</sup> i.p., 2h |      | p-value |
|                          | pg lipid/mg                           | SEM  | pg lipid/mg                                  | SEM  |          | pg lipid/mg                                 | SEM  |         | pg lipid/mg                                  | SEM  |         | pg lipid/mg                                 | SEM  |         |
| <b>CYP</b>               |                                       |      |                                              |      |          |                                             |      |         |                                              |      |         |                                             |      |         |
| 9,10-EpOME               | 1.08                                  | 0.13 | 1.55                                         | 0.37 | > 0.05   | 0.95                                        | 0.33 | > 0.05  | 1.2                                          | 0.15 | > 0.05  | 0.91                                        | 0.23 | > 0.05  |
| 9,10-DiHOME              | 11.5                                  | 2.84 | 12.62                                        | 0.63 | > 0.05   | 11.95                                       | 0.21 | > 0.05  | 8.21                                         | 2.42 | > 0.05  | 6.74                                        | 2.15 | > 0.05  |
| 12,13-EpOME              | 5.48                                  | 0.92 | 4.05                                         | 0.25 | > 0.05   | 6.39                                        | 0.91 | > 0.05  | 8.55                                         | 2.03 | > 0.05  | 6.22                                        | 1.33 | > 0.05  |
| 12,13-DiHOME             | 2.71                                  | 0.64 | 2.72                                         | 0.38 | > 0.05   | 2.83                                        | 0.77 | > 0.05  | 2.45                                         | 0.46 | > 0.05  | 1.78                                        | 0.56 | > 0.05  |
| 9-HODE                   | 28.8                                  | 3.85 | 36.5                                         | 7.18 | > 0.05   | 36.5                                        | 3.94 | > 0.05  | 31.6                                         | 5.59 | > 0.05  | 30.3                                        | 5.14 | > 0.05  |
| 13-HODE                  | 37.7                                  | 10   | 43.0                                         | 5.63 | > 0.05   | 41.4                                        | 4.89 | > 0.05  | 39.7                                         | 6.93 | > 0.05  | 28.9                                        | 7.20 | > 0.05  |
| 14,15-EET                | 214.7                                 | 34.8 | 203                                          | 75.2 | > 0.05   | 211.9                                       | 31.6 | > 0.05  | 291.2                                        | 81.1 | > 0.05  | 302.2                                       | 88.3 | > 0.05  |
| <b>LOX</b>               |                                       |      |                                              |      |          |                                             |      |         |                                              |      |         |                                             |      |         |
| 5-HETE                   | 15.5                                  | 2.68 | 14.0                                         | 2.97 | > 0.05   | 11.2                                        | 1.98 | > 0.05  | 12.3                                         | 2.81 | > 0.05  | 12.9                                        | 1.81 | > 0.05  |
| 12-HETE                  | 2.66                                  | 0.93 | 7.59                                         | 1.41 | * < 0.05 | 4.11                                        | 0.92 | > 0.05  | 5.40                                         | 1.70 | > 0.05  | 5.87                                        | 1.93 | > 0.05  |
| 15-HETE                  | 27.8                                  | 7.83 | 37.9                                         | 6.19 | > 0.05   | 34.8                                        | 5.23 | > 0.05  | 33.2                                         | 3.36 | > 0.05  | 33.4                                        | 4.64 | > 0.05  |
| 20-HETE                  | 4.72                                  | 0.65 | 4.52                                         | 0.58 | > 0.05   | 4.93                                        | 1.16 | > 0.05  | 3.95                                         | 0.42 | > 0.05  | 3.90                                        | 1.23 | > 0.05  |
| LTB <sub>4</sub>         | 4.01                                  | 0.71 | 5.74                                         | 1.25 | > 0.05   | 3.74                                        | 0.81 | > 0.05  | 5.40                                         | 1.37 | > 0.05  | 5.13                                        | 1.42 | > 0.05  |
| <b>COX</b>               |                                       |      |                                              |      |          |                                             |      |         |                                              |      |         |                                             |      |         |
| PGE <sub>2</sub>         | 44.5                                  | 14.8 | 46.8                                         | 11.2 | > 0.05   | 61.3                                        | 9.81 | > 0.05  | 40.6                                         | 19.8 | > 0.05  | 69.8                                        | 13.1 | > 0.05  |
| PGD <sub>2</sub>         | 233.2                                 | 9.60 | 251.5                                        | 65.8 | > 0.05   | 208.8                                       | 31.3 | > 0.05  | 189.9                                        | 55.2 | > 0.05  | 265.7                                       | 35.9 | > 0.05  |
| 6-keto-PGF <sub>1α</sub> | 70.3                                  | 28.1 | 95.3                                         | 27.1 | > 0.05   | 112.7                                       | 25.1 | > 0.05  | 94.0                                         | 28.2 | > 0.05  | 128.4                                       | 31.6 | > 0.05  |
| PGF <sub>2α</sub>        | 112.6                                 | 29.4 | 129.6                                        | 11.7 | > 0.05   | 129.2                                       | 26.6 | > 0.05  | 117.7                                        | 31.5 | > 0.05  | 144.4                                       | 5.42 | > 0.05  |
| TXB <sub>2</sub>         | 81.8                                  | 20.6 | 108.6                                        | 9.08 | > 0.05   | 113.9                                       | 28.4 | > 0.05  | 88.5                                         | 32.6 | > 0.05  | 115.5                                       | 11.6 | > 0.05  |

**Table S2d: Lipid concentrations, 8d after paclitaxel injection, in the plasma of wild type mice following administration of terfenadine, loratadine, telmisartan or olmesartan for two hours (n=6 animals per group). n.d.: not determined. Significant differences from vehicle are highlighted, \*p<0.05, one-way ANOVA.**

| plasma                       | High dose paclitaxel (HD, 6 mg/kg) 8d |      |                                                    |      |          |                                                   |      |         |                                                 |      |          |                                                |      |         |
|------------------------------|---------------------------------------|------|----------------------------------------------------|------|----------|---------------------------------------------------|------|---------|-------------------------------------------------|------|----------|------------------------------------------------|------|---------|
|                              | vehicle<br>2h i.p.                    |      | terfenadine<br>1 mg · kg <sup>-1</sup> i.p.,<br>2h |      | p-value  | loratidine<br>1 mg · kg <sup>-1</sup> i.p.,<br>2h |      | p-value | telmisartan<br>5 mg · kg <sup>-1</sup> i.p., 2h |      | p-value  | olmesartan<br>5 mg · kg <sup>-1</sup> i.p., 2h |      | p-value |
|                              | pg<br>lipid/mg                        | SEM  | pg<br>lipid/mg                                     | SEM  |          | pg<br>lipid/<br>mg                                | SEM  |         | pg<br>lipid/mg                                  | SEM  |          | pg<br>lipid/mg                                 | SEM  |         |
| <b>CYP</b>                   |                                       |      |                                                    |      |          |                                                   |      |         |                                                 |      |          |                                                |      |         |
| 9,10-<br>EpOME               | 0.89                                  | 0.14 | 0.52                                               | 0.16 | * < 0.05 | 0.79                                              | 0.09 | > 0.05  | 0.5                                             | 0.14 | * < 0.05 | 0.70                                           | 0.11 | > 0.05  |
| 9,10-<br>DiHOME              | 6.9                                   | 0.65 | 3.20                                               | 0.47 | * < 0.05 | 4.40                                              | 1.16 | > 0.05  | 3.57                                            | 0.68 | * < 0.05 | 6.11                                           | 0.81 | > 0.05  |
| 12,13-<br>EpOME              | 20.4                                  | 3.13 | 10.78                                              | 2.12 | * < 0.05 | 24.24                                             | 3.58 | > 0.05  | 16.7                                            | 1.16 | > 0.05   | 25.5                                           | 4.47 | > 0.05  |
| 12,13-<br>DiHOME             | 20.2                                  | 1.15 | 12.7                                               | 1.4  | > 0.05   | 19.2                                              | 3.84 | > 0.05  | 17.5                                            | 2.44 | > 0.05   | 17.2                                           | 3.24 | > 0.05  |
| 9-HODE                       | 15.2                                  | 1.65 | 9.66                                               | 0.87 | * < 0.05 | 17.4                                              | 2.14 | > 0.05  | 8.4                                             | 0.65 | * < 0.05 | 17.4                                           | 1.73 | > 0.05  |
| 13-HODE                      | 41.2                                  | 0.25 | 43.6                                               | 4.15 | > 0.05   | 44.8                                              | 6.37 | > 0.05  | 44.7                                            | 2.5  | > 0.05   | 51.1                                           | 9.12 | > 0.05  |
| 14,15-<br>EET                | 7.34                                  | 1.1  | 7.9                                                | 2.3  | > 0.05   | 6.41                                              | 0.46 | > 0.05  | 4.2                                             | 0.8  | * < 0.05 | 8.89                                           | 1.9  | > 0.05  |
| 14,15-<br>DHET               | 0.39                                  | 0.1  | 0.36                                               | 0.7  | > 0.05   | 0.52                                              | 0.16 | > 0.05  | 0.49                                            | 0.04 | > 0.05   | 0.29                                           | 0.05 | > 0.05  |
| 5,6-EET                      | 0.25                                  | 0.04 | 0.3                                                | 0.13 | > 0.05   | 0.18                                              | 0.08 | > 0.05  | 0.21                                            | 0.03 | > 0.05   | 0.32                                           | 0.08 | > 0.05  |
| 5,6-DHET                     | 0.28                                  | 0.11 | 0.32                                               | 0.05 | > 0.05   | 0.16                                              | 0.02 | > 0.05  | 0.38                                            | 0.52 | > 0.05   | 0.32                                           | 0.06 | > 0.05  |
| 11,12-<br>EET                | 0.14                                  | 0.02 | n.d.                                               | n.d. | n.d.     | 0.13                                              | 0.04 | > 0.05  | 0.10                                            | 0.03 | > 0.05   | 0.10                                           | 0.02 | > 0.05  |
| 11,12-<br>DHET               | 0.33                                  | 0.06 | 0.37                                               | 0.04 | > 0.05   | 0.31                                              | 0.03 | > 0.05  | 0.3                                             | 0.08 | > 0.05   | 0.2                                            | 0.11 | > 0.05  |
| 8,9-EET                      | n.d.                                  | n.d. | n.d.                                               | n.d. | n.d.     | n.d.                                              | n.d. | n.d.    | n.d.                                            | n.d. | n.d.     | n.d.                                           | n.d. | n.d.    |
| 8,9-DHET                     | 0.15                                  | 0.02 | 0.24                                               | 0.7  | > 0.05   | 0.16                                              | 0.03 | > 0.05  | 0.28                                            | 0.11 | > 0.05   | 0.21                                           | 0.05 | > 0.05  |
| <b>LOX</b>                   |                                       |      |                                                    |      |          |                                                   |      |         |                                                 |      |          |                                                |      |         |
| 5-HETE                       | 0.78                                  | 0.16 | 0.64                                               | 0.14 | > 0.05   | 0.81                                              | 0.12 | > 0.05  | 0.62                                            | 0.11 | > 0.05   | 0.58                                           | 0.08 | > 0.05  |
| 12-HETE                      | 1.16                                  | 0.23 | 0.85                                               | 0.20 | > 0.05   | 1.03                                              | 0.38 | > 0.05  | 0.91                                            | 0.20 | > 0.05   | 0.88                                           | 0.13 | > 0.05  |
| 15-HETE                      | 1.08                                  | 0.35 | 1.06                                               | 0.24 | > 0.05   | 0.91                                              | 0.27 | > 0.05  | 1.11                                            | 0.27 | > 0.05   | 1.21                                           | 0.34 | > 0.05  |
| 20-HETE                      | 0.32                                  | 0.05 | 0.30                                               | 0.06 | > 0.05   | 0.33                                              | 0.04 | > 0.05  | 0.24                                            | 0.05 | > 0.05   | 0.41                                           | 0.08 | > 0.05  |
| LTB <sub>4</sub>             | n.d.                                  | n.d. | n.d.                                               | n.d. | n.d.     | n.d.                                              | n.d. | n.d.    | n.d.                                            | n.d. | n.d.     | n.d.                                           | n.d. | n.d.    |
| <b>COX</b>                   |                                       |      |                                                    |      |          |                                                   |      |         |                                                 |      |          |                                                |      |         |
| PGE <sub>2</sub>             | 2.37                                  | 0.39 | 2.53                                               | 0.42 | > 0.05   | 1.88                                              | 0.61 | > 0.05  | 2.26                                            | 0.28 | > 0.05   | 1.87                                           | 0.48 | > 0.05  |
| PGD <sub>2</sub>             | 1.36                                  | 0.41 | 0.86                                               | 0.16 | > 0.05   | 1.12                                              | 0.30 | > 0.05  | 1.83                                            | 0.67 | > 0.05   | 1.07                                           | 0.32 | > 0.05  |
| 6-keto-<br>PGF <sub>1α</sub> | 18.2                                  | 2.32 | 15.03                                              | 1.88 | > 0.05   | 19.4                                              | 3.38 | > 0.05  | 20.9                                            | 1.08 | > 0.05   | 20.16                                          | 0.91 | > 0.05  |
| PGF <sub>2α</sub>            | 0.15                                  | 0.05 | 0.45                                               | 0.28 | > 0.05   | 0.29                                              | 0.11 | > 0.05  | 0.19                                            | 0.08 | > 0.05   | 0.08                                           | 0.03 | > 0.05  |
| TXB <sub>2</sub>             | 0.18                                  | 0.09 | 0.59                                               | 0.34 | > 0.05   | 0.33                                              | 0.14 | > 0.05  | 0.27                                            | 0.05 | > 0.05   | 0.37                                           | 0.12 | > 0.05  |



**Table S3: Full list of the 615 tested compounds for the CYP-inhibition repurposing screen, as well as molecular weight and indication.** Each compound was tested in duplicates for the inhibition of CYP3A4 and CYP2J2. Substances considered specific for CYP2J2-inhibition are marked in green, control substances used in this study are marked in blue and nonspecific inhibitors of both CYP2J2 and CYP3A4 are marked in red.

| Name                           | Mol. Wt. | Indication                                                             | % Inhibition I CYP3A4 | % Inhibition II CYP3A4 | % Inhibition I CYP2J2 | % Inhibition II CYP2J2 |
|--------------------------------|----------|------------------------------------------------------------------------|-----------------------|------------------------|-----------------------|------------------------|
| Clindamycin HCl                | 461.4    | Antibiotic                                                             | 76.31                 | 31.57                  | -8.18                 | -17.89                 |
| Felbamate                      | 238.2    | Anticonvulsant                                                         | 53.63                 | 20.80                  | -3.85                 | -18.25                 |
| Cyclosporine A                 | 1202.6   | Immunosuppressive; Immunomodulatory; Antirheumatic; Dermatologic Agent | 89.88                 | 81.69                  | 46.19                 | 34.99                  |
| Donepezil HCl                  | 416      | Parasympathomimetic; Nootropic                                         | 61.21                 | 26.23                  | 31.44                 | 22.07                  |
| Lincomycin HCl                 | 443      | Antibiotic; Antibacterial                                              | 44.00                 | 12.31                  | -7.22                 | -18.88                 |
| Mycophenolic Acid              | 320.3    | Antibiotic; Antineoplastic                                             | 48.65                 | 23.17                  | -6.95                 | -24.78                 |
| Sirolimus (Rapamycin)          | 914.2    | Immunosuppressant                                                      | 94.15                 | 91.99                  | 75.07                 | 69.93                  |
| Spectinomycin HCl Pentahydrate | 495.3    | Antibiotic; Antibacterial                                              | 32.34                 | 12.70                  | -7.74                 | -16.16                 |
| Amiodarone HCl                 | 681.8    | Antiarrhythmic                                                         | 32.46                 | 21.53                  | 87.28                 | 84.24                  |
| Nicardipine HCl                | 516      | Antihypertensive; Vasodilator; Antiarrhythmic                          | 91.83                 | 90.09                  | 90.57                 | 88.73                  |
| Pimozide                       | 461.6    | Antipsychotic                                                          | 84.22                 | 59.28                  | 78.17                 | 80.11                  |
| Loperamide HCl                 | 513.5    | Antidiarrheal                                                          | 53.41                 | 11.19                  | 64.53                 | 60.28                  |
| Tolbutamide                    | 270.3    | Hypoglycemic Agent; Antidiabetic                                       | 42.16                 | 7.05                   | -21.02                | -46.41                 |
| Glipizide                      | 445.5    | Hypoglycemic; Antidiabetic                                             | 45.20                 | 4.47                   | -18.84                | -37.36                 |
| Phentolamine HCl               | 317.8    | Vasodilator                                                            | 45.72                 | 18.47                  | 10.54                 | -5.57                  |
| Quinine HCl H2O                | 396.9    | Muscle Relaxant and antihypertensive agent                             | 48.09                 | 15.07                  | -13.73                | -29.97                 |
| Propafenone HCl                | 377.9    | Antiarrhythmic                                                         | 47.90                 | 20.80                  | 4.75                  | -16.71                 |
| Phenytoin                      | 252.3    | Anticonvulsant                                                         | 20.95                 | 3.39                   | -4.66                 | -16.92                 |
| Procainamide HCl               | 271.8    | Antiarrhythmic                                                         | 9.97                  | 0.12                   | -12.70                | -27.94                 |
| Lidocaine HCl H2O              | 288.8    | Anesthetic; Antiarrhythmic                                             | 3.59                  | -6.69                  | -14.59                | -25.87                 |
| Flecainide Acetate             | 474.4    | Antiarrhythmic                                                         | 66.12                 | 21.40                  | -12.29                | -31.88                 |
| Rosiglitazone                  | 357.4    | Hypoglycemic agent                                                     | 52.62                 | 16.92                  | -10.62                | -26.13                 |
| Amantadine HCl                 | 187.7    | Antiviral/Antiparkinsonian                                             | 41.04                 | 2.27                   | -26.04                | -39.31                 |
| Prazosin HCl                   | 419.9    | Antihypertensive                                                       | 36.65                 | 1.62                   | -8.53                 | -28.12                 |
| Clonidine HCl                  | 266.6    | Antihypertensive treatment                                             | 39.35                 | 2.05                   | -14.63                | -39.91                 |
| Guanabenz Acetate              | 291.1    | Antihypertensive                                                       | 42.84                 | 10.85                  | -8.73                 | -24.99                 |
| Dihydroergotamine Mesylate     | 679.8    | Antimigraine; Vasoconstrictor; Analgesic                               | 90.37                 | 80.44                  | 6.69                  | -11.78                 |

|                                     |       |                                                                        |        |        |        |        |
|-------------------------------------|-------|------------------------------------------------------------------------|--------|--------|--------|--------|
| <b>Emtricitabine</b>                | 247.3 | Antiviral                                                              | 2.99   | 7.57   | -14.35 | -37.62 |
| <b>Betaxolol HCl</b>                | 343.9 | Antihypertensive                                                       | -1.77  | -0.06  | -11.59 | -35.27 |
| <b>Caffeine</b>                     | 194.2 | Central Nervous System Stimulant; Anorexigenic Agent                   | -7.58  | -6.56  | -17.74 | -28.22 |
| <b>(S)-Timolol Maleate</b>          | 432.5 | Antihypertensive; Anti-Arrhythmia agent                                | 66.49  | 27.13  | -12.58 | -36.08 |
| <b>Salbutamol Hemisulfate</b>       | 576.7 | Bronchodilator                                                         | 47.19  | 10.41  | -16.73 | -46.54 |
| <b>Pindolol</b>                     | 248.3 | Hypertensive; Vasodilator                                              | 45.42  | 4.17   | -20.15 | -38.74 |
| <b>Dobutamine HCl</b>               | 337.8 | Sympathomimetic; Cardiotonic                                           | 43.48  | 22.87  | -4.50  | -22.32 |
| <b>Sotalol HCl</b>                  | 308.8 | Anti-Arrhythmia                                                        | 35.53  | -0.49  | -18.08 | -37.12 |
| <b>Maprotiline HCl</b>              | 313.9 | Antidepressant                                                         | 50.04  | 29.25  | 11.91  | -9.54  |
| <b>Pilocarpine HCl</b>              | 244.7 | Anti-glaucoma and xerostomia treatment                                 | 37.78  | 16.19  | -13.24 | -33.39 |
| <b>Ipratropium Br</b>               | 412.4 | Bronchodilator; Antispasmodic                                          | 8.73   | -2.21  | -14.31 | -26.40 |
| <b>Tropicamide</b>                  | 284.4 | Anticholinergic; Mydriatic                                             | 33.58  | 26.36  | 55.08  | 46.73  |
| <b>Pancuronium 2Br</b>              | 732.7 | Muscle relaxant; Neuromuscular Nondepolarizing Agent                   | -8.25  | -9.28  | -15.46 | -28.77 |
| <b>Ivermectin</b>                   | 875.1 | Anthelmintic; Antiprotozoal; Antinematodal                             | 89.84  | 73.20  | 62.86  | 49.37  |
| <b>Haloperidol</b>                  | 375.9 | Antipsychotic; Schizophrenia treatment                                 | 57.19  | 12.44  | 64.21  | 54.72  |
| <b>Cimetidine</b>                   | 252.3 | Anti-Ulcer                                                             | 47.71  | 3.43   | -19.31 | -38.90 |
| <b>Zonisamide</b>                   | 212.2 | Anti-epileptic agent                                                   | 37.22  | 6.32   | -20.48 | -42.68 |
| <b>Zoledronic Acid Monohydrate</b>  | 290.1 | Bone conservation agent                                                | 40.40  | 1.71   | -14.73 | -32.06 |
| <b>Naltrexone HCl</b>               | 377.9 | Narcotic antagonist used for treatment of heroin and alcohol addiction | 37.55  | 3.78   | -14.87 | -34.88 |
| <b>Zolmitriptan</b>                 | 287.4 | Antimigrane (acute migranes treatment)                                 | 32.01  | 4.34   | -14.89 | -42.99 |
| <b>Memantine HCl</b>                | 215.8 | Antiparkinson; Antidyskinetic Agent                                    | 23.76  | 2.31   | -15.12 | -36.65 |
| <b>Riluzole HCl</b>                 | 270.7 | Anticonvulsant; Neuroprotective                                        | 12.63  | -4.37  | 19.22  | 14.89  |
| <b>Propofol</b>                     | 178.3 | Anaesthetic                                                            | -1.84  | -16.00 | -21.04 | -34.43 |
| <b>Aminophylline</b>                | 420.4 | Bronchodilator                                                         | 65.59  | 26.14  | -15.00 | -37.80 |
| <b>Nateglinide</b>                  | 317.4 | Antidiabetic (treatment of type 2 diabetes)                            | 50.19  | 5.93   | -16.65 | -38.82 |
| <b>(±) Isoproterenol HCl</b>        | 247.7 | Bronchodilator                                                         | 46.55  | 14.85  | -18.89 | -37.12 |
| <b>Acetylcholine Chloride</b>       | 181.7 | Cholinergic                                                            | 45.05  | 3.86   | -15.76 | -37.62 |
| <b>Atropine Sulfate Monohydrate</b> | 694.8 | Antispasmodic agent                                                    | 37.89  | 3.26   | -12.92 | -35.24 |
| <b>Apomorphine HCl Hemihydrate</b>  | 321.8 | Non selective dopamine agonist and anti - Parkinsonian                 | 68.55  | 45.66  | 38.15  | 41.96  |
| <b>Chlorpromazine HCl</b>           | 355.3 | Antipsychotic                                                          | 58.17  | 28.68  | 24.79  | 4.35   |
| <b>Fluphenazine HCl</b>             | 510.4 | Antipsychotic                                                          | 48.84  | 46.65  | 44.13  | 22.51  |
| <b>Risperidone</b>                  | 410.5 | Antipsychotic                                                          | 6.85   | -0.40  | 4.57   | -17.50 |
| <b>Diphenhydramine HCl</b>          | 291.8 | Antiallergy; antitussive; antiemetic and sedative                      | -20.55 | -8.07  | -14.51 | -25.33 |
| <b>Promethazine HCl</b>             | 320.9 | Anti-Allergic; Sedative                                                | 76.09  | 36.48  | 19.23  | 4.53   |
| <b>Ranitidine HCl</b>               | 350.9 | Antiulcer                                                              | 44.64  | 5.16   | -13.40 | -38.90 |

|                                                       |        |                                                                              |       |        |        |        |
|-------------------------------------------------------|--------|------------------------------------------------------------------------------|-------|--------|--------|--------|
| <b>Epinephrine (L-(-)-Epinephrine-(+)-Bitartrate)</b> | 333.3  | Vasoconstrictor; Mydriatic; Bronchodilator                                   | 43.59 | 8.60   | -14.98 | -40.44 |
| <b>Norepinephrine Bitartrate Monohydrate</b>          | 337.3  | Vasoconstrictor                                                              | 38.79 | 1.06   | -10.96 | -43.26 |
| <b>Quetiapine Fumarate</b>                            | 883.1  | Antipsychotic                                                                | 56.59 | 25.93  | 60.98  | 61.32  |
| <b>Imipramine HCl</b>                                 | 316.9  | Antidepressant                                                               | 44.11 | 14.42  | 4.29   | -18.23 |
| <b>Amoxapine</b>                                      | 313.8  | Antidepressant                                                               | 51.23 | 24.42  | 20.05  | -3.98  |
| <b>Metoclopramide HCl</b>                             | 336.3  | Antipsychotic and antiemetic agent                                           | 13.34 | -4.24  | -11.29 | -29.76 |
| <b>Nalbuphine HCl Dihydrate</b>                       | 429.9  | Narcotic; Analgesic; Opioid                                                  | -0.42 | -13.85 | -14.27 | -26.50 |
| <b>Carbachol (Carbamylcholine) Chloride</b>           | 182.7  | Glaucoma treatment; Cholinergic Agonist                                      | -6.56 | -9.84  | -14.21 | -25.48 |
| <b>Famotidine</b>                                     | 337.5  | Ant ulcerative                                                               | 66.12 | 28.21  | -6.09  | -21.91 |
| <b>Isoniazid</b>                                      | 137.1  | Antitubercular Agent                                                         | 55.47 | 19.38  | -14.13 | -30.18 |
| <b>Ticlopidine HCl</b>                                | 300.2  | Platelet Aggregation Inhibitor; Fibrinolytic                                 | 54.35 | 23.30  | 9.33   | 4.17   |
| <b>Clemastine Fumarate</b>                            | 460    | Antipruritic; Anti-Allergic; Antihistamine                                   | 68.10 | 38.21  | 30.65  | 11.21  |
| <b>Vardenafil</b>                                     | 488.6  | Erectile dysfunction and impotence                                           | 63.79 | 31.87  | 45.44  | 23.79  |
| <b>Linezolid</b>                                      | 337.4  | Antibiotic; Antibacterial                                                    | 37.29 | -28.02 | -4.68  | -18.83 |
| <b>Docetaxel (Taxotere)</b>                           | 807.9  | Antineoplastic                                                               | 94.23 | 93.15  | 49.44  | 34.39  |
| <b>Olopatadine</b>                                    | 337.4  | Antihistamine agent                                                          | 13.34 | -1.09  | -5.54  | -20.44 |
| <b>Tolcapone</b>                                      | 273.2  | Antiparkinson; Antidyskinetic                                                | 46.36 | 29.29  | 40.24  | 49.00  |
| <b>Olmesartan</b>                                     | 446.5  | Antihypertensive agent                                                       | 18.77 | 12.53  | -5.95  | -17.37 |
| <b>Nisoldipine</b>                                    | 388.4  | Antihypertensive; Vasodilator                                                | 79.91 | 65.23  | 86.09  | 87.29  |
| <b>Olanzapine</b>                                     | 312.4  | Antipsychotic; Antiemetic                                                    | 54.87 | 19.89  | -5.97  | -18.23 |
| <b>Lovastatin</b>                                     | 404.5  | Anticholesteremic                                                            | 88.27 | 71.69  | 69.71  | 67.35  |
| <b>Lamotrigine</b>                                    | 256.1  | Antidepressant; Anticonvulsant                                               | 48.20 | 18.21  | -3.43  | -20.16 |
| <b>Azathioprine</b>                                   | 277.3  | Immunosuppressant                                                            | 45.76 | 20.11  | -1.80  | -17.68 |
| <b>Sildenafil Citrate</b>                             | 666.7  | Erectile dysfunction; vasodilator; pulmonary arterial hypertension treatment | 54.98 | 34.55  | 4.33   | -8.00  |
| <b>Atovaquone</b>                                     | 366.8  | Antipneumocystic/Antimalarial                                                | 36.28 | 13.69  | -1.11  | -5.05  |
| <b>Sertaconazole</b>                                  | 437.8  | Used to treat skin infections (fungal)                                       | 97.30 | 97.20  | 97.86  | 97.00  |
| <b>Cefepime HCl Hydrate</b>                           | 571.5  | Antibiotic                                                                   | 18.51 | 13.13  | -6.33  | -8.39  |
| <b>Aripiprazole</b>                                   | 448.4  | Antipsychotic                                                                | 18.77 | 12.14  | 94.22  | 91.44  |
| <b>Candesartan</b>                                    | 440.5  | Antihypertensive agent                                                       | 54.61 | 14.55  | -15.14 | -35.32 |
| <b>Butenafine HCl</b>                                 | 353.9  | Antifungal                                                                   | 62.07 | 31.79  | 67.88  | 65.37  |
| <b>Dorzolamide HCl</b>                                | 360.9  | Antihypertensive                                                             | 39.76 | 8.65   | -19.57 | -40.57 |
| <b>Escitalopram</b>                                   | 324.4  | Antidepressant                                                               | 43.63 | 8.09   | -15.52 | -32.40 |
| <b>Eprosartan Mesylate</b>                            | 520.6  | Antihypertensive                                                             | 39.02 | 6.67   | -18.36 | -41.79 |
| <b>Entacapone</b>                                     | 305.3  | Antiparkinsonian                                                             | 40.78 | 16.92  | 49.35  | 43.99  |
| <b>Bleomycin Sulfate</b>                              | 1512.6 | Antineoplastic                                                               | 26.27 | 0.59   | -11.61 | -30.34 |
| <b>Guanfacine HCl</b>                                 | 282.6  | Antihypertensive                                                             | 41.53 | 22.91  | -11.39 | -24.59 |
| <b>Tizanidine HCl</b>                                 | 290.2  | Muscle relaxant                                                              | 6.40  | 1.67   | -14.31 | -31.67 |

|                        |              |                                                                                                                |              |              |              |              |
|------------------------|--------------|----------------------------------------------------------------------------------------------------------------|--------------|--------------|--------------|--------------|
| Carvedilol             | 406.5        | Antihypertensive; Congestive heart failure treatment                                                           | 66.49        | 64.06        | 46.33        | 30.08        |
| Flumazenil             | 303.3        | Benzodiazepine antagonist                                                                                      | 50.93        | -2.99        | -17.07       | -35.40       |
| Gefitinib              | 446.9        | Antineoplastic                                                                                                 | 54.53        | 22.48        | 77.15        | 70.80        |
| Imatinib Mesylate      | 589.7        | Antineoplastic                                                                                                 | 66.45        | 37.04        | 94.98        | 94.31        |
| Idarubicin HCl         | 534          | Antineoplastic; Antibiotic                                                                                     | 50.71        | 32.86        | 53.77        | 47.18        |
| <b>Montelukast Na</b>  | <b>608.2</b> | <b>Anti-Asthmatic; Antiarrhythmic</b>                                                                          | <b>92.65</b> | <b>86.90</b> | <b>95.12</b> | <b>94.57</b> |
| Exemestane             | 296.4        | Antineoplastic                                                                                                 | -2.29        | -53.88       | 42.48        | 21.29        |
| Dinoprostone           | 352.5        | Muscle relaxant (used in labor); bone resorption stimulant                                                     | 21.40        | 1.97         | -10.60       | -29.97       |
| Metformin HCl          | 165.6        | Antidiabetic                                                                                                   | 7.53         | -3.07        | -15.88       | -35.24       |
| Anagrelide             | 256.1        | Used in treating thrombocytosis                                                                                | 0.93         | -9.88        | -19.01       | -32.82       |
| Dofetilide             | 441.6        | Antiarrhythmic                                                                                                 | -5.14        | -8.55        | -15.10       | -27.10       |
| Erlotinib              | 393.4        | Can be used in treating several types of non-small cell cancer (eg. Lung)                                      | 70.88        | 45.23        | 83.66        | 80.32        |
| Tacrine HCl            | 234.7        | Alzheimer's disease treatment                                                                                  | 43.14        | 1.84         | -15.52       | -41.09       |
| Galantamine HBr        | 368.3        | Alzheimer's disease treatment                                                                                  | 44.90        | 8.56         | -14.89       | -37.17       |
| Amloride HCl 2H2O      | 302.1        | Diuretic                                                                                                       | 35.27        | 8.86         | -15.42       | -37.44       |
| Amlodipine             | 408.9        | Antihypertensive agent and in treating angina pectoris                                                         | 83.51        | 70.44        | 55.80        | 45.06        |
| Diltiazem HCl          | 451          | Antihypertensive; Vasodilator; Cardiovascular Agent (antianginal); Antiarrhythmic                              | 60.08        | 34.46        | -14.07       | -33.83       |
| Nifedipine             | 346.3        | Antihypertensive; Vasodilator; Tocolytic                                                                       | 59.44        | 53.29        | 86.88        | 81.76        |
| Nimodipine             | 418.4        | Antihypertensive; Vasodilator                                                                                  | 81.41        | 78.80        | 72.85        | 63.64        |
| Verapamil HCl          | 491.1        | Antihypertensive; Antiangina; Antiarrhythmia; and most recently; cluster headaches treatment                   | 32.91        | 20.45        | 13.82        | 9.20         |
| Gabapentin             | 171.2        | Anticonvulsant; Anti-anxiety Agent; Antiparkinson Agent; Analgesic                                             | -7.69        | -12.25       | -14.23       | -23.11       |
| <b>Felodipine</b>      | <b>384.3</b> | <b>Antihypertensive</b>                                                                                        | <b>93.63</b> | <b>91.38</b> | <b>93.17</b> | <b>90.24</b> |
| Phenoxybenzamine HCl   | 340.3        | Antihypertensive; Vasodilator                                                                                  | 53.75        | -17.90       | 74.53        | 75.39        |
| Trifluoperazine HCl    | 480.4        | Antipsychotic; Antiemetics                                                                                     | 76.84        | 55.57        | 53.87        | 42.43        |
| Latanoprost            | 432.6        | Antiglaucoma; Antihypertensive; Neuroprotective                                                                | 65.89        | 39.46        | 37.04        | 35.56        |
| Alfuzosin              | 389.5        | Used in treating benign prostatic hyperplasia (BPH). It works by relaxing the muscles                          | 33.62        | 9.60         | -11.73       | -38.90       |
| Bromocriptine Mesylate | 750.7        | Antiparkinson; Antidyskinetic                                                                                  | 93.52        | 88.02        | 86.30        | 83.92        |
| Clozapine              | 326.8        | Antipsychotic                                                                                                  | 40.03        | 11.49        | 2.11         | -15.30       |
| Acitretin              | 326.4        | Dermatologic                                                                                                   | 39.05        | 30.84        | 61.00        | 55.24        |
| <b>Calcitriol</b>      | <b>416.6</b> | <b>Antihypocalcemic Agent; Antihypoparathyroid Agent; Vitamin (Vitamin D); Bone Density Conservation Agent</b> | <b>83.99</b> | <b>83.32</b> | <b>96.31</b> | <b>94.65</b> |
| <b>Ketoconazole</b>    | <b>531.4</b> | <b>Antifungal</b>                                                                                              | <b>97.04</b> | <b>97.11</b> | <b>97.10</b> | <b>96.19</b> |

|                                            |        |                                                                              |        |        |        |        |
|--------------------------------------------|--------|------------------------------------------------------------------------------|--------|--------|--------|--------|
| <b>Cromolyn Na (Disodium Cromoglycate)</b> | 512.3  | Mast cell stabilizer; Antiallergy; Antiasthma                                | 51.23  | 0.46   | -11.65 | -40.07 |
| <b>Capsaicin</b>                           | 305.4  | Analgesic                                                                    | 86.62  | 71.60  | 87.83  | 88.07  |
| <b>Dexamethasone</b>                       | 392.5  | Anti-inflammatory; Hormonal; Antineoplastic                                  | 54.95  | 9.81   | -4.88  | -23.50 |
| <b>Dipyridamole</b>                        | 504.6  | Vasodilator; Platelet aggregation Inhibitor                                  | 78.52  | 64.11  | 75.67  | 71.40  |
| <b>Ethacrynic Acid</b>                     | 303.1  | Diuretic                                                                     | 41.45  | 4.86   | -3.00  | -24.57 |
| <b>Indomethacin</b>                        | 357.8  | Non-steroidal antiinflammatory; Analgesic; Antipyretic                       | 36.99  | 5.67   | -8.79  | -33.70 |
| <b>Naproxen</b>                            | 230.3  | Analgesic; anti-inflammatory; antipyretic                                    | 29.83  | 0.93   | -9.11  | -30.81 |
| <b>Ibuprofen</b>                           | 206.3  | Nonsteroidal anti-inflammatory; Analgesic;                                   | 12.63  | -8.76  | -12.42 | -31.17 |
| <b>Bumetanide</b>                          | 364.4  | Diuretic                                                                     | -8.78  | -15.35 | -16.81 | -36.05 |
| <b>Neomycin Sulfate</b>                    | 908.9  | Antibiotic                                                                   | -13.39 | -9.71  | -12.38 | -20.73 |
| <b>Auranofin</b>                           | 678.5  | Antirheumatic                                                                | 96.85  | 95.69  | 44.32  | 30.63  |
| <b>Captopril</b>                           | 217.3  | Antihypertensive                                                             | 43.36  | 6.49   | -17.58 | -42.39 |
| <b>Tranlycypromine Hemisulfate</b>         | 364.5  | Antidepressant and anxiolytic                                                | 45.80  | 4.42   | -11.67 | -35.01 |
| <b>Piroxicam</b>                           | 331.3  | Non-steroidal anti-inflammatory agent                                        | 38.90  | 3.86   | -10.34 | -36.60 |
| <b>Moxifloxacin HCl</b>                    | 437.9  | Antibiotic                                                                   | 39.09  | 2.31   | -6.67  | -32.37 |
| <b>Carbidopa</b>                           | 226.2  | Antiparkinson; Antidyskinetic agent                                          | 45.91  | 5.98   | -4.39  | -18.51 |
| <b>Ketoprofen</b>                          | 254.3  | Nonsteroidal anti-inflammatory; Analgesic; Antipyretic                       | 1.23   | 2.01   | -11.19 | -31.01 |
| <b>Meloxicam</b>                           | 351.4  | Nonsteroidal Anti-inflammatory; Analgesic; Antineoplastic                    | 4.12   | -3.29  | -12.96 | -34.62 |
| <b>Terbinafine HCl</b>                     | 327.9  | Antifungal                                                                   | 50.15  | -6.13  | 62.33  | 60.75  |
| <b>Sodium Phenylbutyrate</b>               | 186.2  | Antineoplastic                                                               | -5.55  | -12.17 | -14.25 | -20.44 |
| <b>Simvastatin</b>                         | 418.6  | Anticholesteremic; antilipemic                                               | 92.58  | 85.48  | 90.14  | 88.91  |
| <b>Goserelin Acetate</b>                   | 1329.5 | Antineoplastic                                                               | 58.51  | 26.14  | -8.30  | -26.63 |
| <b>Raloxifene HCl</b>                      | 510.1  | Antihypocalcemic; Osteoporosis Prophylactic; Bone Density Conservation Agent | 94.86  | 91.77  | 75.01  | 71.21  |
| <b>Rifampin (Rifampicin)</b>               | 822.9  | Antibiotic; Antituberculosis Agent; Leprostatic                              | 56.56  | 22.57  | 15.80  | 3.46   |
| <b>Etoposide</b>                           | 588.6  | Antineoplastic                                                               | 41.41  | 10.93  | -6.11  | -25.19 |
| <b>Mitomycin C</b>                         | 334.3  | Antineoplastic antibiotic; Alkylating Agent; Cross-Linking Reagent           | 34.70  | 12.53  | 7.66   | -10.48 |
| <b>Delavirdine Mesylate</b>                | 552.7  | Antiviral; Anti-HIV Agent                                                    | 81.97  | 74.79  | 95.38  | 94.34  |
| <b>Daunorubicin HCl</b>                    | 564    | Antineoplastic                                                               | 21.47  | 15.41  | 47.36  | 41.83  |
| <b>Doxorubicin HCl</b>                     | 580    | Antineoplastic                                                               | 32.76  | 34.93  | 42.16  | 34.65  |
| <b>Cetirizine HCl</b>                      | 461.8  | Anti-Allergic; Antihistamine                                                 | -0.98  | -5.10  | -6.15  | -14.55 |
| <b>Lapatinib Ditosylate</b>                | 925.5  | Antineoplastic                                                               | 50.82  | 45.32  | 92.66  | 91.62  |
| <b>Pioglitazone HCl</b>                    | 392.9  | Antidiabetic; Hypoglycemic Agent                                             | -10.69 | -20.09 | 10.06  | -1.13  |
| <b>Rivastigmine Tartrate</b>               | 400.4  | Neuroprotective; Dementia treatment                                          | -25.23 | -20.65 | -16.57 | -44.79 |
| <b>Ergotamine Tartrate</b>                 | 1313.4 | Vasoconstrictor                                                              | 66.45  | 61.52  | 32.08  | 10.35  |

|                                   |       |                                                                                              |        |        |        |        |
|-----------------------------------|-------|----------------------------------------------------------------------------------------------|--------|--------|--------|--------|
| <b>Sulindac</b>                   | 356.4 | Nonsteroidal anti-inflammatory; Analgesic; Antipyretic; Antineoplastic                       | -10.28 | -12.51 | 36.96  | 26.58  |
| <b>Valproic Acid</b>              | 144.2 | Anticonvulsant and mood-stabilizer; Also used to treat migraine headaches and schizophrenia. | -18.41 | -19.02 | -13.56 | -37.04 |
| <b>Calcipotriene</b>              | 412.6 | Dermatologic Agent; Antipsoriatic                                                            | 48.35  | 55.27  | 91.54  | 87.03  |
| <b>Zafirlukast</b>                | 575.7 | Antiasthmatic                                                                                | 62.18  | 66.52  | 89.20  | 86.72  |
| <b>Zileuton</b>                   | 236.3 | Antiasthmatic                                                                                | -11.85 | -21.26 | -11.81 | -22.06 |
| <b>Bortezomib</b>                 | 384.2 | Antineoplastic                                                                               | 16.19  | 13.60  | -16.39 | -25.82 |
| <b>Diazoxide</b>                  | 230.7 | Antihypertensive; Vasodilator; Diuretic                                                      | -30.07 | -32.72 | -19.05 | -49.28 |
| <b>Glyburide</b>                  | 494   | Hypoglycemic; Antidiabetic                                                                   | -3.23  | -13.54 | 12.13  | 1.16   |
| <b>Minoxidil</b>                  | 209.2 | Antihypertensive; Vasodilator                                                                | -36.06 | -33.06 | -20.66 | -47.04 |
| <b>Tolazamide</b>                 | 311.4 | Hypoglycemic Agent; Antidiabetic                                                             | -12.52 | -15.66 | -3.15  | -23.47 |
| <b>Bexarotene</b>                 | 348.5 | Antineoplastic                                                                               | 30.02  | 31.79  | -10.76 | -48.27 |
| <b>Tranexamic Acid</b>            | 157.2 | Antifibrinolytic                                                                             | -29.13 | -31.81 | -18.84 | -40.65 |
| <b>Celecoxib</b>                  | 381.4 | Non-steroidal anti-inflammatory; Anti-osteoarthritis; Anti-rheumatoid; analgesic             | 0.67   | -14.28 | 55.02  | 47.70  |
| <b>Levetiracetam</b>              | 170.2 | Anticonvulsant; Nootropic                                                                    | -27.40 | -23.15 | -17.43 | -34.75 |
| <b>Letrozole</b>                  | 285.3 | Antineoplastic                                                                               | -8.14  | -1.61  | -14.15 | -34.15 |
| <b>Anastrozole</b>                | 293.4 | Antineoplastic                                                                               | 16.71  | 12.22  | -1.25  | -12.07 |
| <b>Bicalutamide</b>               | 430.4 | Antineoplastic                                                                               | 41.68  | 37.04  | 83.70  | 79.17  |
| <b>Clindamycin Palmitate HCl</b>  | 699.9 | Antibiotic                                                                                   | 23.01  | 30.11  | 52.58  | 40.89  |
| <b>Vorinostat</b>                 | 264.3 | Antineoplastic; Treatment of cutaneous T cell lymphoma (CTCL)                                | -27.22 | -31.77 | -4.48  | -37.17 |
| <b>Didanosine</b>                 | 236.2 | Antiviral; Anti-HIV Agent                                                                    | -33.29 | -29.10 | -18.82 | -44.98 |
| <b>Dolasetron</b>                 | 324.4 | Antinauseant and antiemetic agent.                                                           | -25.72 | -34.66 | -14.09 | -37.70 |
| <b>Enalaprilat Maleate</b>        | 492.5 | Antihypertensive                                                                             | -32.20 | -25.18 | -20.42 | -41.35 |
| <b>Fluvastatin Na</b>             | 433.5 | Anticholesteremic                                                                            | -18.30 | -27.46 | -3.83  | -22.82 |
| <b>Fosinopril Na</b>              | 585.6 | Antihypertensive                                                                             | -16.91 | -15.96 | 12.17  | -4.71  |
| <b>Gemcitabine HCl</b>            | 299.7 | Antineoplastic; Antiviral; Immunosuppressive                                                 | 4.42   | -22.85 | -14.75 | -35.11 |
| <b>Granisetron HCl</b>            | 348.9 | Antiemetic                                                                                   | -11.70 | -14.02 | -11.85 | -28.04 |
| <b>Oxaliplatin</b>                | 397.3 | Antineoplastic                                                                               | -24.29 | -29.44 | -12.36 | -45.21 |
| <b>Atazanavir</b>                 | 704.9 | Antiretroviral drug and protease inhibitor                                                   | 75.56  | 75.61  | 69.93  | 56.83  |
| <b>Mycophenolate Mofetil</b>      | 433.5 | Antineoplastic; Immunosuppressant                                                            | 13.00  | 5.42   | 0.06   | -19.01 |
| <b>Clofarabine</b>                | 303.7 | Antineoplastic                                                                               | -32.28 | -37.37 | -16.00 | -43.72 |
| <b>Cabergoline</b>                | 451.6 | Antiparkinson                                                                                | 5.17   | -9.62  | -14.94 | -35.92 |
| <b>Ibandronate Na Monohydrate</b> | 359.2 | Inhibits osteoclast-mediated bone resorption                                                 | -26.58 | -24.27 | -15.72 | -40.18 |
| <b>Imipenem</b>                   | 299.4 | inhibits osteoclast-mediated bone resorption                                                 | -20.10 | -30.82 | -11.01 | -35.90 |
| <b>Lomustine</b>                  | 233.7 | Antineoplastic                                                                               | -18.56 | -26.21 | -9.98  | -27.78 |
| <b>Adapalene</b>                  | 412.5 | Dermatologic                                                                                 | 72.82  | 73.93  | 53.10  | 49.79  |

|                                                            |        |                                                                                                                    |        |        |        |        |
|------------------------------------------------------------|--------|--------------------------------------------------------------------------------------------------------------------|--------|--------|--------|--------|
| <b>Meropenem</b>                                           | 383.5  | Antibiotic; Antibacterial                                                                                          | -22.72 | -19.88 | -16.63 | -29.48 |
| <b>Oseltamivir Phosphate</b>                               | 410.4  | Antiviral                                                                                                          | -29.43 | -33.32 | -7.74  | -49.10 |
| <b>Pamidronate Disodium Pentahydrate (Pamidronic Acid)</b> | 369.1  | Promotes osteoblast proliferation and differentiation while inhibiting osteoclastogenesis and osteoclast function. | -34.34 | -43.10 | -15.76 | -51.95 |
| <b>Pramipexole Dihydrochloride Monohydrate</b>             | 302.3  | Nonergot dopamine agonist                                                                                          | -29.62 | -35.00 | -13.02 | -45.42 |
| <b>Triptorelin Acetate</b>                                 | 1371.5 | Causes a surge in the testosterone level. Used in prostate cancer patients.                                        | 66.68  | 65.53  | -13.32 | -47.85 |
| <b>Risredonic Acid</b>                                     | 283.1  | Used to strengthen bone; treat or prevent osteoporosis                                                             | -26.17 | -29.53 | -13.95 | -52.10 |
| <b>Rocuronium Bromide</b>                                  | 609.7  | Muscle Relaxant                                                                                                    | -2.70  | -10.23 | -19.69 | -47.01 |
| <b>Vinorelbine</b>                                         | 778.9  | Antineoplastic for treatment breast and non-small cell lung cancer.                                                | -9.34  | -0.53  | -14.39 | -46.28 |
| <b>Salmeterol</b>                                          | 415.6  | Can be used for the treatment of asthma and chronic obstructive pulmonary disease(COPD).                           | 29.46  | 31.57  | 43.83  | 13.27  |
| <b>Vincristine Sulfate</b>                                 | 923    | Antineoplastic                                                                                                     | -7.24  | -14.45 | -25.13 | -48.19 |
| <b>Aspirin (Acetylsalicylic Acid)</b>                      | 180.2  | Analgesic                                                                                                          | -13.27 | -20.96 | -16.29 | -34.96 |
| <b>Acyclovir (Acycloguanosine) Zovirax</b>                 | 225.2  | Antiviral                                                                                                          | -31.04 | -43.45 | -13.73 | -49.26 |
| <b>Zidovudine (3'-Azido-3'-Deoxythymidine)</b>             | 267.2  | Antiviral; Anti-HIV                                                                                                | -29.20 | -36.43 | -12.17 | -47.59 |
| <b>Allopurinol</b>                                         | 136.1  | Antiurolithic                                                                                                      | -28.53 | -35.35 | -14.65 | -49.13 |
| <b>Altretamine</b>                                         | 210.3  | Antineoplastic                                                                                                     | -27.25 | -35.95 | -12.46 | -45.55 |
| <b>Alendronate Na Trihydrate</b>                           | 325.1  | Bone resorption inhibitor                                                                                          | -27.22 | -35.48 | -13.65 | -47.77 |
| <b>Albendazole</b>                                         | 265.3  | Anthelminthic                                                                                                      | -27.22 | -22.77 | 34.36  | 8.94   |
| <b>Sumatriptan Succinate</b>                               | 413.5  | Antimigraine; Vasoconstrictor                                                                                      | -26.99 | -27.07 | -14.79 | -38.58 |
| <b>Amifostine</b>                                          | 214.2  | Antineoplastic                                                                                                     | -23.17 | -29.96 | -12.03 | -37.44 |
| <b>4-Aminosalicylic Acid</b>                               | 153.1  | Antibacterial                                                                                                      | -19.23 | -16.60 | -13.89 | -39.39 |
| <b>Mesalamine (5-Aminosalicylic Acid)</b>                  | 153.1  | Anti-inflammatory                                                                                                  | -10.99 | -13.50 | -6.85  | -24.15 |
| <b>Ampicillin Trihydrate</b>                               | 403.5  | Broad-spectrum antibiotic; Anti-Bacterial                                                                          | -30.44 | -33.15 | -9.11  | -44.38 |
| <b>(±)-Atenolol</b>                                        | 266.3  | Antihypertensive                                                                                                   | -38.80 | -32.37 | -12.96 | -48.63 |
| <b>Atracurium Besylate</b>                                 | 1243.5 | Neuromuscular blocking agent                                                                                       | 30.21  | 20.67  | -0.79  | -24.52 |
| <b>Vinblastine Sulfate</b>                                 | 909.1  | Antineoplastic                                                                                                     | 8.77   | 9.47   | -14.89 | -57.64 |
| <b>Azithromycin</b>                                        | 749    | Antibiotic                                                                                                         | -28.19 | -37.76 | -10.99 | -46.99 |
| <b>Aztreonam</b>                                           | 435.4  | Antibiotic                                                                                                         | -22.12 | -35.22 | -11.13 | -38.61 |
| <b>Betamethasone</b>                                       | 392.5  | Anti-inflammatory; Immunosuppressive                                                                               | -17.85 | -23.50 | -6.69  | -27.60 |
| <b>Bisacodyl</b>                                           | 361.4  | Laxative                                                                                                           | -9.68  | -16.52 | 17.11  | 6.36   |
| <b>Buspirone HCl</b>                                       | 422    | Anti-anxiety Agent; Anxiolytic; Sedative                                                                           | -5.40  | -8.63  | -6.69  | -16.69 |
| <b>Carboplatin</b>                                         | 339.2  | Antineoplastic                                                                                                     | -15.56 | -19.75 | -15.72 | -24.10 |
| <b>Carbamazepine</b>                                       | 236.3  | Anticonvulsant; Antimanic                                                                                          | -20.85 | -26.13 | 0.50   | -18.20 |
| <b>Cefotaxime Acid</b>                                     | 455.5  | Broad-spectrum antibiotic; Anti-Bacterial                                                                          | -20.88 | -23.02 | -5.22  | -24.83 |

|                              |              |                                                                          |              |              |              |              |
|------------------------------|--------------|--------------------------------------------------------------------------|--------------|--------------|--------------|--------------|
| Ceftazidime                  | 546.6        | Antibiotic                                                               | -24.52       | -22.16       | -11.29       | -26.53       |
| Chloramphenicol              | 323.1        | Broad-spectrum antibiotic; Anti-Bacterial. A tetracycline.               | -14.74       | -19.40       | -4.37        | -27.18       |
| Chlorambucil                 | 304.2        | Antineoplastic; alkylating agent                                         | -17.36       | -23.50       | -1.77        | -21.54       |
| Chlorpheniramine Maleate     | 390.9        | Antipruritic; Anti-Allergic; Antihistamine                               | -15.11       | -15.18       | -1.33        | -18.64       |
| Chloroquine Diphosphate      | 515.9        | Antimalarial                                                             | -15.04       | -16.13       | 1.63         | -15.07       |
| Thalidomide                  | 258.2        | Immunosuppressant; Leprostatic; Angiogenesis Inhibitor                   | -17.47       | -6.86        | -1.45        | -11.62       |
| Ciprofloxacin                | 331.3        | Antibiotic                                                               | -13.16       | -7.04        | 1.71         | -12.93       |
| Citalopram HBr               | 405.3        | Antidepressant                                                           | -5.33        | -9.80        | -1.53        | -10.89       |
| Clarithromycin               | 748          | Antibiotic                                                               | -4.05        | -3.59        | -10.78       | -38.37       |
| Clomiphene Citrate           | 598.1        | Estrogen Modulator; Fertility Agent                                      | 52.58        | 53.51        | 86.24        | 85.75        |
| Clopidogrel Hydrogen Sulfate | 419.9        | Antiplatelet Agent; Platelet Aggregation Inhibitor; Fibrinolytic         | 11.43        | 3.13         | 54.67        | 53.02        |
| Clobetasol Propionate        | 467          | Anti-inflammatory; Corticosteroid                                        | -1.02        | -7.60        | 80.15        | 76.30        |
| Orphenadrine Citrate         | 461.5        | Muscle relaxant; Antiparkinson agent                                     | -14.40       | -16.47       | -8.04        | -35.56       |
| Crotamiton                   | 203.3        | Scabicial (for treating scabies) and antipruritic                        | -25.49       | -28.50       | -9.27        | -22.01       |
| Cyclophosphamide monohydrate | 279.1        | Antineoplastic; Immunosuppressive                                        | -14.81       | -22.16       | -16.53       | -29.48       |
| Cytarabine                   | 243.2        | Antineoplastic; Antiviral; Immunosuppressive                             | -10.20       | -16.86       | -12.94       | -30.00       |
| Dacarbazine                  | 182.2        | Antineoplastic                                                           | -10.80       | -11.30       | -11.77       | -25.72       |
| <b>Danazol</b>               | <b>337.5</b> | <b>Estrogen Antagonist; Endometriosis treatment</b>                      | <b>90.40</b> | <b>90.78</b> | <b>98.41</b> | <b>97.81</b> |
| Desloratadine                | 310.8        | Antihistamine; Antiallergy                                               | 13.75        | 8.39         | 36.09        | 16.93        |
| Dextromethorphan             | 271.4        | An Antitussive drug (cough suppressant)                                  | -27.67       | -26.64       | -17.07       | -45.68       |
| Diclofenac Na Salt           | 318.1        | Non-steroidal anti-inflammatory                                          | -23.43       | -33.28       | -19.71       | -50.01       |
| Zalcitabine                  | 211.2        | Antiviral; Anti-HIV Agent                                                | -28.60       | -33.11       | -26.30       | -43.57       |
| Diffunisal                   | 250.2        | Nonsteroidal Anti-inflammatory; Analgesic; Antipyretic                   | -24.56       | -38.71       | -18.93       | -42.47       |
| <b>Disulfiram</b>            | <b>296.5</b> | <b>Alcohol Deterrent</b>                                                 | <b>81.15</b> | <b>85.39</b> | <b>97.12</b> | <b>96.58</b> |
| Doxazosin Mesylate           | 547.6        | Antihypertensive; Vasodilator                                            | -41.91       | -44.66       | 74.39        | 72.96        |
| Doxycycline Monohydrate      | 462.4        | Broad-spectrum antibiotic synthetically derived from oxytetracycline.    | -18.03       | -20.61       | -15.70       | -30.86       |
| Enalapril                    | 376.4        | Used in reducing hypertension and in treatment of chronic heart failure. | -12.15       | -16.99       | -16.65       | -34.96       |
| Esomeprazole Potassium       | 383.5        | An antiulcerative agent.                                                 | 12.40        | 6.84         | 17.65        | 9.54         |
| Estradiol                    | 272.4        | Estrogen; Hormonal replacement; Antineoplastic                           | 13.53        | 10.59        | 84.66        | 84.13        |
| Estrone                      | 270.4        | Antineoplastic; Estrogen                                                 | 10.94        | 16.27        | 22.79        | -0.14        |
| Etidronate Disodium          | 250          | Antiosteoporotic                                                         | -26.28       | -40.60       | -21.67       | -44.79       |
| Famciclovir                  | 321.3        | Antiviral                                                                | -30.82       | -26.77       | -20.05       | -44.69       |
| Fenoldopam Mesylate          | 401.9        | Antihypertensive                                                         | -17.06       | -22.77       | -20.82       | -44.06       |
| Fenoprofen Calcium           | 558.6        | Analgesic                                                                | -25.23       | -26.17       | -15.58       | -31.35       |
| Fenofibrate                  | 360.8        | Antilipidemic                                                            | -28.34       | -24.01       | 80.11        | 75.86        |



|                                                                 |       |                                                                                        |        |        |        |        |
|-----------------------------------------------------------------|-------|----------------------------------------------------------------------------------------|--------|--------|--------|--------|
| <b>Finasteride</b>                                              | 372.5 | Benign prostatic hypertrophy treatment                                                 | 12.66  | -3.29  | -11.11 | -26.16 |
| <b>Fluorouracil (5-Fluorouracil)</b>                            | 130.1 | Antineoplastic                                                                         | -12.19 | -24.40 | -17.94 | -33.96 |
| <b>Flurbiprofen</b>                                             | 244.3 | Nonsteroidal anti-inflammatory agent; Antipyretic; Analgesic                           | -8.70  | -18.84 | -7.05  | -14.16 |
| <b>Amitriptyline HCl</b>                                        | 313.9 | Antidepressant                                                                         | -15.67 | -19.96 | -0.32  | -26.84 |
| <b>Floxuridine</b>                                              | 246.2 | Antineoplastic                                                                         | -27.63 | -37.07 | -20.32 | -49.21 |
| <b>Fluocinolone Acetonide</b>                                   | 452.5 | Antiinflammatory                                                                       | -8.03  | -13.67 | 33.88  | 18.57  |
| <b>Flutamide</b>                                                | 276.2 | Antineoplastic; Hormonal                                                               | -20.85 | -19.66 | -2.16  | -32.63 |
| <b>Fluconazole</b>                                              | 306.3 | Antifungal                                                                             | 18.14  | 17.40  | -13.89 | -38.45 |
| <b>Furosemide</b>                                               | 330.7 | Diuretic                                                                               | -24.41 | -36.73 | -19.67 | -41.72 |
| <b>Ganciclovir</b>                                              | 255.2 | Antiviral                                                                              | -25.98 | -25.78 | -12.80 | -37.41 |
| <b>Gatifloxacin</b>                                             | 375.4 | Antibiotic                                                                             | -18.90 | -19.66 | -14.45 | -33.86 |
| <b>Gentamycin Sulfate</b>                                       | 575.7 | Antibiotic; Antibacterial                                                              | -13.84 | -9.88  | -3.65  | -18.41 |
| <b>Gemfibrozil</b>                                              | 250.3 | Antilipemic                                                                            | -23.69 | -18.03 | -14.75 | -23.47 |
| <b>Glimepiride</b>                                              | 490.6 | Hypoglycemic; Antidiabetic                                                             | -24.07 | -32.12 | 15.27  | -8.39  |
| <b>Hydrocortisone</b>                                           | 362.5 | Anti-inflammatory                                                                      | -30.03 | -39.10 | -13.42 | -45.89 |
| <b>Hydrocortisone Acetate</b>                                   | 404.5 | Anti-inflammatory                                                                      | -34.15 | -39.10 | -1.43  | -30.21 |
| <b>Idoxuridine</b>                                              | 354.1 | Antiviral                                                                              | -24.03 | -31.51 | -14.53 | -35.40 |
| <b>Ifosfamide</b>                                               | 261.1 | Antineoplastic; Immunosuppressive                                                      | -33.40 | -26.86 | -13.58 | -47.01 |
| <b>Imiquimod</b>                                                | 240.3 | Immunomodulant; Antineoplastic; Antiviral; Adjuvant                                    | -21.00 | -24.66 | -7.40  | -39.99 |
| <b>Indapamide</b>                                               | 365.8 | Antihypertensive; Diuretic                                                             | -22.79 | -33.19 | -5.91  | -24.10 |
| <b>Itraconazole</b>                                             | 705.6 | Antifungal                                                                             | 86.17  | 83.41  | 85.37  | 79.43  |
| <b>Levonorgestrel</b>                                           | 312.4 | Contraceptive                                                                          | 8.43   | 1.75   | 67.82  | 60.25  |
| <b>Levofloxacin HCl</b>                                         | 397.8 | Broad spectrum antibiotic.                                                             | -14.51 | -13.11 | -7.74  | -23.60 |
| <b>Leflunomide</b>                                              | 270.2 | Antirheumatic; Antineoplastic; Anti-inflammatory                                       | -12.15 | -16.47 | 10.98  | -16.30 |
| <b>Lisinopril 2H2O</b>                                          | 441.5 | Antihypertensive                                                                       | -32.35 | -32.46 | -14.25 | -55.76 |
| <b>Loratadine</b>                                               | 382.9 | Anti-Allergic; Antihistamine                                                           | -18.56 | -28.41 | 8.33   | 7.82   |
| <b>Losartan Potassium</b>                                       | 461   | Antihypertensive; Antiarrhythmic                                                       | -20.96 | -21.90 | -10.84 | -37.96 |
| <b>Mebendazole</b>                                              | 295.3 | Anthelmintic                                                                           | -32.32 | -41.42 | 53.16  | 41.51  |
| <b>Medroxyprogesterone Acetate</b>                              | 386.5 | Contraceptive                                                                          | -33.36 | -35.61 | 1.69   | -14.55 |
| <b>Mefenamic Acid</b>                                           | 241.3 | Non-steroidal anti-inflammatory; Analgesic; Antipyretic                                | -23.28 | -25.70 | -12.98 | -37.80 |
| <b>Melphalan</b>                                                | 305.2 | A chemotherapy drug. Can be used as treatment for ovarian cancer and multiple myeloma. | 30.06  | 18.95  | 21.52  | 8.45   |
| <b>Methyldopa Sesquihydrate (L-?-Methyl-Dopa Sesquihydrate)</b> | 229.2 | An antihypertensive agent                                                              | -20.62 | -27.81 | -16.35 | -27.86 |
| <b>Methylprednisolone</b>                                       | 374.5 | Anti-inflammatory; Antiemetic; Neuroprotective                                         | -3.98  | -28.93 | 12.51  | 15.88  |
| <b>Metoprolol Tartrate</b>                                      | 684.8 | Antihypertensive; Antiarrhythmic                                                       | -40.41 | -31.56 | -9.72  | -42.21 |

|                                          |              |                                                                                          |              |              |              |              |
|------------------------------------------|--------------|------------------------------------------------------------------------------------------|--------------|--------------|--------------|--------------|
| <b>Methimazole</b>                       | 114.2        | Antithyroid Agent                                                                        | -28.94       | -40.13       | -13.48       | -46.70       |
| <b>Metronidazole</b>                     | 171.2        | Anti-Infective; Antiprotozoal                                                            | -27.89       | -30.09       | -13.22       | -44.66       |
| <b>Minocycline</b>                       | 457.5        | Broad spectrum antibiotic. Tetracycline antibiotic usually used to treat acne vulgaris.  | -30.55       | -32.72       | -14.37       | -41.79       |
| <b>Mitoxantrone HCl</b>                  | 517.4        | Antineoplastic                                                                           | -1.95        | -6.91        | 7.39         | -20.86       |
| <b>Paclitaxel (Taxol)</b>                | 853.9        | Antineoplastic                                                                           | -5.18        | -11.86       | -15.43       | -39.31       |
| <b>Nabumetone</b>                        | 228.3        | Nonsteroidal anti-inflammatory; Antineoplastic                                           | -17.62       | -16.95       | 18.36        | 2.68         |
| <b>Naphazoline HCl</b>                   | 246.7        | Vasoconstrictor; ocular agent                                                            | -21.41       | -17.03       | -10.72       | -29.01       |
| <b>Nefazodone HCl</b>                    | 506.5        | Antidepressant                                                                           | 56.67        | 55.79        | 81.52        | 80.01        |
| <b>Norethindrone</b>                     | 298.4        | Contraceptives                                                                           | 21.44        | 14.34        | 45.49        | 43.05        |
| <b>Norfloxacin</b>                       | 319.3        | Antibiotic                                                                               | -19.50       | -19.84       | -2.36        | -23.13       |
| <b>Nystatin</b>                          | 926.1        | Antifungal; antibacterial                                                                | -7.31        | -10.61       | 11.69        | -7.06        |
| <b>Ofloxacin</b>                         | 361.4        | Antibiotic                                                                               | -20.81       | -24.70       | -4.41        | -21.93       |
| <b>Omeprazole</b>                        | 345.4        | Anti-Ulcer Agent                                                                         | 9.25         | -1.91        | 32.20        | 20.32        |
| <b>Oxcarbazepine</b>                     | 252.3        | Anticonvulsant                                                                           | -3.64        | -16.60       | -1.27        | -19.11       |
| <b>Oxiconazole Nitrate</b>               | <b>492.2</b> | <b>Antifungal</b>                                                                        | <b>97.23</b> | <b>97.29</b> | <b>97.32</b> | <b>96.58</b> |
| <b>Oxacillin sodium salt monohydrate</b> | 441.4        | Antibiotic                                                                               | -1.09        | -13.54       | -7.90        | -13.61       |
| <b>Pantoprazole</b>                      | 383.4        | Treats gastroesophageal reflux disease (GERD) and damage to the esophagus.               | 1.42         | -2.94        | 25.63        | 23.04        |
| <b>Paroxetine HCl</b>                    | 365.8        | Antidepressant                                                                           | 28.82        | 35.67        | 74.89        | 65.89        |
| <b>Penciclovir</b>                       | 253.3        | An Antiviral drug used for the treatment for various herpesvirus infections              | -3.34        | -10.74       | 1.33         | -6.74        |
| <b>Pentoxifylline</b>                    | 278.3        | Hematologic Agent; Platelet Aggregation Inhibitor; Free Radical Scavenger                | 31.56        | 41.52        | -20.15       | 22.12        |
| <b>Penicillin V Potassium</b>            | 388.5        | Antibiotic                                                                               | 31.12        | 24.18        | -26.62       | 14.69        |
| <b>Piperacillin</b>                      | 517.6        | An extended spectrum beta-lactam antibiotic                                              | 23.62        | 27.37        | -21.39       | 10.58        |
| <b>Prednisolone</b>                      | 360.4        | Antineoplastic; Hormonal; Anti-inflammatory                                              | 21.43        | 17.02        | -20.48       | 14.52        |
| <b>Progesterone</b>                      | 314.5        | Contraceptive                                                                            | 26.28        | 25.46        | 32.99        | 52.17        |
| <b>Procarbazine HCl</b>                  | 257.8        | Antineoplastic                                                                           | 25.96        | 19.07        | -5.13        | 31.01        |
| <b>Prednisone</b>                        | 358.4        | Antineoplastic; Hormonal; Anti-inflammatory                                              | 29.69        | 37.78        | -11.63       | 6.53         |
| <b>Primaquine Phosphate</b>              | 455.3        | Antimalarial; Antiprotozoal                                                              | 32.99        | 35.95        | 34.20        | 51.29        |
| <b>Praziquantel</b>                      | 312.4        | Anthelmintic                                                                             | -2.43        | 9.77         | -0.15        | 9.61         |
| <b>Quinapril HCl</b>                     | 475          | Antihypertensive                                                                         | 7.10         | 20.08        | 25.83        | 31.89        |
| <b>Ranolazine 2HCl</b>                   | 500.5        | An antianginal agent. In the United States it was used to treat chronic angina pectoris. | 11.15        | 13.32        | -14.64       | 25.46        |
| <b>Ramipril</b>                          | 416.5        | Antihypertensive                                                                         | 17.38        | 5.11         | -42.27       | -6.73        |
| <b>Ribavirin</b>                         | 244.2        | Antiviral                                                                                | 11.07        | 7.58         | -44.31       | -8.90        |
| <b>Nelfinavir Mesylate</b>               | <b>663.9</b> | <b>Antiviral</b>                                                                         | <b>82.13</b> | <b>80.89</b> | <b>89.61</b> | <b>94.48</b> |
| <b>Rimantadine HCl</b>                   | 215.8        | Antiviral                                                                                | 11.91        | 4.70         | -31.02       | -0.10        |
| <b>Propranolol HCl</b>                   | 295.8        | Antihypertensive; Anti-anxiety; Antiarrhythmic                                           | 17.03        | 12.55        | -32.18       | -1.63        |

|                                  |       |                                                                                                                                                                                  |        |        |        |        |
|----------------------------------|-------|----------------------------------------------------------------------------------------------------------------------------------------------------------------------------------|--------|--------|--------|--------|
| <b>Scopolamine HBr</b>           | 384.3 | A tropane alkaloid drug with muscarinic antagonist effects. It contains anticholinergic properties.                                                                              | 7.02   | 6.53   | -28.44 | -6.88  |
| <b>Spirolactone</b>              | 416.6 | Diuretic                                                                                                                                                                         | -25.41 | -12.31 | 0.38   | 4.98   |
| <b>Streptomycin Sulfate</b>      | 679.7 | Antibiotic                                                                                                                                                                       | 0.87   | 11.36  | -25.74 | -20.70 |
| <b>Sulfadiazine</b>              | 250.3 | Anti-Infective; Antiprotozoal                                                                                                                                                    | 3.65   | -1.64  | -20.48 | -17.30 |
| <b>Sulfasalazine</b>             | 398.4 | Antirheumatic; Anti-Infective                                                                                                                                                    | 20.20  | 19.44  | -36.88 | 0.49   |
| <b>Tamsulosin HCl</b>            | 445   | Antineoplastic; Symptomatic treatment of benign prostatic hyperplasia (BPH)                                                                                                      | 16.83  | 15.10  | -37.92 | -4.53  |
| <b>Telmisartan</b>               | 514.6 | Antihypertensive                                                                                                                                                                 | 10.60  | 4.52   | 87.51  | 91.46  |
| <b>Terazosin HCl</b>             | 423.9 | It is used for treatment of symptoms of an enlarged prostate (BPH).                                                                                                              | 21.19  | 12.73  | -27.15 | 6.03   |
| <b>Tetracycline</b>              | 444.4 | A broad-spectrum polyketide antibiotic used against many bacterial infections                                                                                                    | 10.67  | 4.20   | -17.17 | 1.72   |
| <b>Temozolomide</b>              | 194.2 | Antineoplastic; alkylating agent                                                                                                                                                 | 3.09   | 5.66   | -35.06 | -11.60 |
| <b>Tinidazole</b>                | 247.3 | Antiprotozoal                                                                                                                                                                    | 2.38   | 4.20   | -30.01 | -14.98 |
| <b>Tobramycin</b>                | 467.5 | Antibiotic                                                                                                                                                                       | -7.98  | 1.01   | -28.34 | -21.79 |
| <b>Topotecan HCl</b>             | 457.9 | Antineoplastic; Treatment of cervix; ovarian and small cell lung cancer                                                                                                          | -9.77  | -8.30  | -23.89 | -26.48 |
| <b>Toremifene Base</b>           | 406   | Induces estrogen -sensitive breast cancer cells to undergo apoptosis.                                                                                                            | 56.61  | 54.97  | 66.61  | 71.95  |
| <b>Tolmetin sodium dihydrate</b> | 315.3 | Non-steroidal anti-inflammatory agent                                                                                                                                            | 20.88  | 16.79  | -30.77 | 4.42   |
| <b>Amoxicillin</b>               | 365.4 | Antibiotic                                                                                                                                                                       | 11.35  | 5.93   | -44.95 | -10.43 |
| <b>Tramadol HCl</b>              | 299.8 | Analgesic; Opioid                                                                                                                                                                | 12.70  | -1.82  | -37.87 | -7.20  |
| <b>Trimethoprim</b>              | 290.3 | Antibiotic; Bacteriostatic; Mainly used in the prophylaxis and treatment of urinary tract infections.                                                                            | 5.95   | 7.30   | -38.60 | -10.05 |
| <b>Valacyclovir HCl</b>          | 360.8 | Antiviral; used in the management of herpes simplex and herpes zoster (shingles).                                                                                                | 17.11  | 5.57   | -36.78 | -12.57 |
| <b>Vecuronium Bromide</b>        | 637.7 | Muscle relaxant                                                                                                                                                                  | 1.74   | 5.11   | -30.44 | -10.55 |
| <b>Venlafaxine HCl</b>           | 313.9 | Antidepressant                                                                                                                                                                   | 0.31   | 7.58   | -34.56 | -15.77 |
| <b>Bupivacaine HCl</b>           | 324.9 | Anesthetic; Local                                                                                                                                                                | 0.03   | -4.10  | -21.51 | -26.45 |
| <b>Ketotifen Fumarate</b>        | 425.5 | Antihistamine                                                                                                                                                                    | -5.09  | -14.82 | -9.94  | -4.21  |
| <b>Naloxone HCl</b>              | 363.8 | Narcotic antagonist                                                                                                                                                              | -11.00 | -16.24 | -15.37 | -20.67 |
| <b>Fluoxetine HCl</b>            | 345.8 | Used for the treatment of major depression (including pediatric depression); obsessive-compulsive disorder; bulimia nervosa; panic disorder and premenstrual dysphoric disorder. | 40.49  | 39.42  | -26.77 | 11.35  |
| <b>Ondansetron</b>               | 293.4 | Used to treat nausea and vomiting in patients undergoing chemotherapy                                                                                                            | 15.28  | 1.92   | -30.41 | 3.42   |
| <b>Tiotropium Bromide</b>        | 472.4 | Bronchodilator                                                                                                                                                                   | 14.68  | 1.55   | -46.82 | -13.10 |
| <b>Thioridazine HCl</b>          | 407   | Antipsychotic                                                                                                                                                                    | 60.54  | 47.99  | 89.38  | 95.25  |

|                                                |              |                                                                                                                     |              |              |              |              |
|------------------------------------------------|--------------|---------------------------------------------------------------------------------------------------------------------|--------------|--------------|--------------|--------------|
| <b>Amrinone</b>                                | 187.2        | Increases the contractions initiated in the heart and can be used with patients that have congestive heart failure. | 19.21        | 14.87        | 12.23        | 28.81        |
| <b>Milrinone</b>                               | 211.2        | Used in patients suffering from heart failure. A vasodilator.                                                       | 7.66         | 5.20         | -37.82       | -10.49       |
| <b>Alprostadil</b>                             | 354.5        | Vasodilator                                                                                                         | -2.63        | 8.53         | -30.49       | -14.54       |
| <b>Misoprostol</b>                             | 382.5        | Anti-Ulcer Agent; Abortifacient Agent                                                                               | 31.91        | 47.13        | 46.92        | 50.58        |
| <b>Argatroban</b>                              | 508.6        | Anticoagulant                                                                                                       | 6.47         | 8.99         | 1.92         | 17.63        |
| <b>Cilastatin Na</b>                           | 380.4        | Antibiotic adjuvant                                                                                                 | -10.21       | -4.65        | -25.53       | -22.34       |
| <b>Butoconazole Nitrate</b>                    | <b>474.8</b> | <b>Antifungal</b>                                                                                                   | <b>97.82</b> | <b>97.90</b> | <b>96.81</b> | <b>97.18</b> |
| <b>Mifepristone</b>                            | 429.6        | Contraceptive                                                                                                       | 67.80        | 64.28        | 81.60        | 88.09        |
| <b>Megestrol Acetate</b>                       | 384.5        | Contraceptive; Hormonal; Antineoplastic                                                                             | -16.48       | -27.69       | 14.94        | 36.23        |
| <b>Tamoxifen Citrate</b>                       | 563.6        | Antineoplastic                                                                                                      | 73.24        | 66.15        | 70.05        | 86.15        |
| <b>Aprepitant</b>                              | <b>534.4</b> | <b>Antiemetic</b>                                                                                                   | <b>92.93</b> | <b>92.15</b> | <b>90.93</b> | <b>91.40</b> |
| <b>Bosentan</b>                                | 551.6        | Antihypertensive                                                                                                    | 15.88        | 8.40         | -29.38       | -6.17        |
| <b>Efavirenz</b>                               | 315.7        | Antiviral                                                                                                           | 44.74        | 38.37        | 64.36        | 73.15        |
| <b>Miglustat (N-Butyldeoxynojirimycin HCl)</b> | 255.7        | Contains broad spectrum antiviral activity. Primarily used to treat Type 1 Gaucher disease (GD1).                   | -10.92       | -6.34        | -20.86       | -14.86       |
| <b>Fulvestrant</b>                             | 606.8        | Antineoplastic; Hormonal                                                                                            | 64.83        | 63.96        | 71.13        | 72.88        |
| <b>Esmolol</b>                                 | 295.4        | Treatment for heart rhythm disorders.                                                                               | 57.12        | -7.71        | -19.82       | -24.72       |
| <b>Capecitabine</b>                            | 359.4        | Antineoplastic                                                                                                      | 15.99        | 15.79        | -30.87       | 2.25         |
| <b>Succinylcholine Chloride 2H2O</b>           | 397.3        | A neuromuscular blocking agent.                                                                                     | 10.08        | 1.46         | -40.55       | -10.87       |
| <b>Cyproheptadine HCl Sesquihydrate</b>        | 377.9        | Antihistamine; Anti-Allergic; Antipruritic                                                                          | 21.23        | 6.07         | -9.03        | 24.67        |
| <b>Abacavir Sulfate</b>                        | 384.4        | Antiviral                                                                                                           | 34.14        | 33.58        | -19.77       | 19.12        |
| <b>Acamprosate</b>                             | 400.5        | Alcohol Deterrent                                                                                                   | 26.51        | 20.90        | -26.47       | 14.78        |
| <b>Acarbose</b>                                | 645.6        | Anti-diabetic                                                                                                       | 17.03        | 22.54        | -26.97       | 9.35         |
| <b>Acebutolol HCl</b>                          | 372.9        | Antihypertensive                                                                                                    | 26.44        | 21.40        | -22.95       | 13.22        |
| <b>Acetaminophen</b>                           | 151.2        | Analgesic                                                                                                           | 23.46        | 22.72        | -15.42       | 8.91         |
| <b>Acetazolamide</b>                           | 222.3        | Antiglaucoma/Edema                                                                                                  | 20.16        | 22.58        | -13.63       | 6.18         |
| <b>Acetohexamide</b>                           | 324.4        | Antidiabetic (Hypoglycemic agent)                                                                                   | 17.15        | 20.94        | -15.12       | 2.66         |
| <b>Acetohydroxamic Acid</b>                    | 75.1         | Antiurolithic                                                                                                       | 10.28        | 20.44        | -7.46        | -5.88        |
| <b>Acetylcysteine</b>                          | 163.2        | Expectorant                                                                                                         | 7.74         | 19.03        | -10.85       | -10.75       |
| <b>Acrivastine</b>                             | 348.4        | Antihistaminic                                                                                                      | 10.44        | 8.58         | 0.18         | -4.77        |
| <b>Adefovir Dipivoxil</b>                      | 501.5        | Antiviral                                                                                                           | 59.19        | 54.56        | -34.68       | 3.80         |
| <b>Adenosine</b>                               | 267.2        | Antiarrhythmic                                                                                                      | 7.66         | 13.55        | -51.19       | -5.82        |
| <b>Alitretinoin</b>                            | 300.4        | Antineoplastic                                                                                                      | 39.89        | 45.76        | 69.94        | 82.22        |
| <b>Almotriptan</b>                             | 469.6        | Antimigraine (esp. adolescent from 12 to 17 years of age)                                                           | 15.12        | 7.35         | -32.48       | -1.18        |
| <b>Alosetron HCl</b>                           | <b>330.8</b> | <b>Antidiarrheal</b>                                                                                                | <b>14.64</b> | <b>13.32</b> | <b>79.09</b> | <b>84.48</b> |
| <b>Ambrisentan</b>                             | 378.4        | Pulmonary hypertension treatment                                                                                    | -5.52        | 5.20         | -25.71       | -20.61       |
| <b>Amcinonide</b>                              | 502.6        | Anti-inflammatory                                                                                                   | 31.24        | 39.97        | 55.43        | 55.86        |

|                                               |        |                                                       |        |        |        |        |
|-----------------------------------------------|--------|-------------------------------------------------------|--------|--------|--------|--------|
| <b>Amikacin Disulfate</b>                     | 781.8  | Antibiotic                                            | 9.17   | 14.56  | 13.78  | 8.06   |
| <b>Aminocaproic Acid</b>                      | 131.2  | Hemostatic; Antifibrinolytic agent                    | 14.29  | 10.95  | -40.17 | -1.16  |
| <b>Aminohippurate Na</b>                      | 217.2  | Diagnostic Aid                                        | 8.97   | 6.57   | -43.96 | -9.87  |
| <b>Aminolevulinic Acid HCl</b>                | 167.6  | Antineoplastic                                        | 13.02  | 4.75   | -39.56 | -6.70  |
| <b>Amlexanox</b>                              | 298.3  | Antihistaminic                                        | 58.83  | 62.04  | 44.46  | 60.50  |
| <b>Amphotericin B</b>                         | 924.1  | Antifungal                                            | 20.80  | 17.25  | -10.92 | 11.96  |
| <b>Arsenic Trioxide</b>                       | 197.8  | Antineoplastic                                        | -3.42  | 2.42   | -27.78 | -12.98 |
| <b>Artemether</b>                             | 298.4  | Antimalarial                                          | 3.85   | 13.64  | 1.34   | 7.56   |
| <b>Articaine HCl</b>                          | 320.8  | Anesthetic                                            | 5.28   | -1.78  | -25.48 | -25.75 |
| <b>L-Ascorbic Acid</b>                        | 176.1  | Antioxidant; Free Radical Scavenger; Vitamin          | -22.32 | -16.88 | -29.88 | -29.15 |
| <b>Asenapine Maleate</b>                      | 401.8  | Antipsychotic                                         | -1.99  | -2.41  | -12.79 | -0.89  |
| <b>Atomoxetine HCl</b>                        | 291.8  | Nootropic; Antidepressant                             | 24.69  | 14.42  | -31.83 | 13.96  |
| <b>Atorvastatin Calcium</b>                   | 1155.3 | Antihyperlipidemic                                    | 21.39  | 6.53   | -41.21 | -13.04 |
| <b>Azacitidine</b>                            | 244.2  | Antineoplastic                                        | 12.50  | 0.73   | -41.99 | -5.73  |
| <b>Azelaic Acid</b>                           | 188.2  | Antineoplastic; Dermatologic                          | 8.57   | 1.65   | -34.84 | -14.83 |
| <b>Azelastine HCl</b>                         | 418.4  | Antihistaminic                                        | 24.13  | 24.82  | -24.95 | 2.57   |
| <b>Bacitracin</b>                             | 1422.7 | Antibiotic                                            | -4.53  | -3.01  | -12.59 | -4.00  |
| <b>Baclofen</b>                               | 213.7  | Muscle relaxant                                       | -6.56  | -0.54  | -28.36 | -21.76 |
| <b>Balsalazide</b>                            | 357.3  | Anti-inflammatory; Anti-Ulcer; Gastrointestinal Agent | -8.42  | 0.41   | -30.18 | -22.37 |
| <b>Beclomethasone Dipropionate</b>            | 521    | Anti-asthmatic; Anti-inflammatory                     | 24.13  | 13.19  | 46.49  | 49.99  |
| <b>Benazepril HCl</b>                         | 461    | Antihypertensive                                      | -8.46  | -20.71 | -18.96 | -21.84 |
| <b>Bendamustine HCl</b>                       | 394.7  | Antineoplastic                                        | 13.41  | 6.66   | -43.33 | -11.95 |
| <b>Bendroflumethiazide</b>                    | 421.4  | Diuretic; antihypertensive                            | 8.05   | -6.20  | -30.74 | -2.53  |
| <b>Benzotropine Mesylate</b>                  | 403.5  | Antiparkinsonian                                      | 20.72  | 19.39  | -4.17  | 38.23  |
| <b>Betaine</b>                                | 117.2  | Homocystinuria                                        | 13.65  | 2.01   | -39.89 | -16.33 |
| <b>Bethanechol Chloride</b>                   | 196.7  | Parasympathomimetic                                   | 6.31   | 0.41   | -34.28 | -12.31 |
| <b>Bimatoprost</b>                            | 415.6  | Antihypertensive; Antiglaucomic                       | 35.01  | 38.28  | -19.01 | 5.89   |
| <b>Biperiden HCl</b>                          | 347.9  | Antiparkinson treatment                               | -1.24  | 7.71   | -25.18 | -8.99  |
| <b>Bisoprolol Fumarate</b>                    | 767    | Antihypertensive                                      | -6.56  | -0.50  | -26.59 | -15.04 |
| <b>Brimonidine</b>                            | 292.1  | Glaucoma treatment                                    | -9.29  | -3.24  | -21.31 | -19.47 |
| <b>Bromfenac</b>                              | 334.2  | Analgesic                                             | -3.06  | -4.06  | -13.30 | -13.60 |
| <b>Brompheniramine Maleate</b>                | 435.3  | Antiallergic                                          | 20.08  | 6.16   | -32.96 | -0.83  |
| <b>Budesonide</b>                             | 430.5  | Anti-inflammatory; Bronchodilator                     | 31.04  | 13.87  | 30.48  | 61.18  |
| <b>Bupropion</b>                              | 239.7  | Antidepressant                                        | 9.32   | 1.33   | -32.13 | -3.03  |
| <b>Busulfan</b>                               | 246.3  | Antineoplastic                                        | 10.75  | 3.20   | -35.34 | -9.78  |
| <b>Butorphanol-(+)-Tartrate (Schedule Iv)</b> | 477.6  | Analgesics; Opioid; Antitussive                       | 12.98  | 3.79   | -28.57 | -4.30  |
| <b>Capreomycin Disulfate</b>                  | 864.9  | Antibiotic                                            | 6.66   | 8.26   | -7.61  | 9.20   |
| <b>Carbinoxamine Maleate</b>                  | 406.9  | Antihistamine; anticholinergic                        | 0.27   | 11.32  | -25.10 | -18.32 |
| <b>Carglumic Acid</b>                         | 190.2  | Hyperammonaemia treatment                             | -1.67  | -7.66  | -28.87 | -18.73 |
| <b>Carmustine</b>                             | 214.1  | Antineoplastic                                        | -4.49  | -5.97  | -15.85 | -21.58 |

|                                                |              |                                                              |              |              |              |              |
|------------------------------------------------|--------------|--------------------------------------------------------------|--------------|--------------|--------------|--------------|
| Cefaclor                                       | 367.8        | Antibiotic                                                   | 25.92        | 21.31        | 6.98         | 36.23        |
| Cefadroxil                                     | 381.4        | Antibiotic                                                   | 10.83        | 5.02         | -36.71       | -7.58        |
| Cefazolin Na                                   | 476.5        | Antibiotic                                                   | 13.97        | 3.42         | -33.52       | -9.81        |
| Cefdinir                                       | 395.4        | Antibiotic                                                   | 8.09         | -6.25        | -31.50       | -10.08       |
| Cefditoren Pivoxil                             | 620.7        | Antibiotic                                                   | 74.04        | 75.87        | 81.47        | 86.35        |
| Cefixime                                       | 453.5        | Antibiotic                                                   | -3.86        | 4.25         | -26.19       | -11.25       |
| Cefotetan Disodium                             | 619.6        | Antibiotic                                                   | -6.52        | -8.16        | -25.31       | -19.03       |
| Cefoxitin Na                                   | 449.4        | Antibiotic                                                   | -10.49       | -5.33        | -22.85       | -23.28       |
| Cefpodoxime Proxetil                           | 557.6        | Antibiotic                                                   | 6.19         | 18.39        | 52.25        | 60.47        |
| Cefprozil                                      | 389.4        | Antibiotic                                                   | 1.07         | -7.20        | 11.63        | 21.97        |
| Ceftibuten                                     | 410.4        | Antibiotic                                                   | 15.40        | 8.12         | -29.22       | 4.60         |
| Ceftizoxim Na                                  | 405.4        | Antibiotic                                                   | 18.34        | 6.25         | -24.72       | 2.07         |
| Ceftriaxone Na                                 | 576.6        | Antibiotic                                                   | 14.88        | 12.59        | -26.19       | -1.95        |
| Cefuroxime Axetil                              | 510.5        | Antibiotic                                                   | 16.15        | 13.28        | -13.68       | 10.88        |
| Cefuroxime Na                                  | 446.4        | Antibiotic                                                   | 7.34         | 10.08        | -24.50       | -0.42        |
| Cephalexin Monohydrate                         | 365.4        | Antibiotic                                                   | 1.07         | 3.01         | -19.49       | -1.16        |
| Chenodiol (Chenodeoxycholic Acid)              | 392.6        | Cholagogue and Choleric                                      | -6.04        | 0.82         | -15.12       | -6.32        |
| Chlorhexidine Dihydrochloride                  | 578.4        | Anti-infective; disinfectant                                 | 73.36        | 70.94        | 80.23        | 75.20        |
| Chlorothiazide                                 | 295.7        | Diuretic; antihypertensive                                   | -0.24        | -5.24        | -9.56        | -15.39       |
| Chlorpropamide                                 | 276.7        | Hypoglycemic Agent                                           | -13.46       | -9.81        | -47.68       | -41.89       |
| Chlorthalidone                                 | 338.8        | Antihypertensive; Diuretic                                   | -11.64       | -15.33       | -52.00       | -43.21       |
| Chlorzoxazone                                  | 169.6        | Muscle relaxant                                              | -13.23       | -2.46        | -42.37       | -41.62       |
| Ciclesonide                                    | 540.7        | Inhibits rhinitis and treatment for allergy                  | 63.71        | 66.33        | 82.13        | 82.86        |
| Ciclopirox                                     | 207.3        | Antifungal                                                   | 28.82        | 34.22        | 18.53        | 13.93        |
| Cidofovir                                      | 279.2        | Antiviral                                                    | -9.93        | -8.44        | -41.96       | -37.40       |
| Cilostazol                                     | 369.5        | Vasodilator; Platelet Aggregation Inhibitor                  | 11.87        | 8.21         | 1.84         | -2.65        |
| Cinacalcet HCl                                 | 393.9        | Calcimimetic                                                 | 32.31        | 49.36        | 76.92        | 60.74        |
| Cisatracurium Besylate                         | 1243.5       | Neuromuscular Blocking Agent                                 | 24.77        | 25.14        | -24.47       | -24.46       |
| Cisplatin (Cis-Diamineplatinum(II) Dichloride) | 300.1        | Antineoplastic                                               | 59.94        | 61.86        | 68.55        | 70.92        |
| Cladribine                                     | 285.7        | Antineoplastic                                               | -28.63       | -21.94       | -54.02       | -53.77       |
| Clavulanate Potassium                          | 237.3        | Antibiotic adjuvant                                          | -29.03       | -24.40       | -59.89       | -61.14       |
| Clobazam                                       | 300.7        | Anticonvulsant                                               | -34.39       | -28.51       | -43.33       | -54.48       |
| Clofazimine                                    | 473.4        | Antibacterial; Leprostatic Agents; Dye                       | -80.68       | -85.17       | 77.50        | 80.63        |
| Clomipramine HCl                               | 351.3        | Antidepressant                                               | -21.88       | -4.01        | -4.86        | 0.93         |
| Clonazepam                                     | 315.7        | Anticonvulsant; Hypnotic and Sedative                        | -21.52       | -13.73       | -31.27       | -37.37       |
| <b>Clotrimazole</b>                            | <b>344.8</b> | <b>Antifungal</b>                                            | <b>97.98</b> | <b>98.18</b> | <b>89.05</b> | <b>89.64</b> |
| Cloxacillin Na                                 | 475.9        | Antibiotic                                                   | -49.00       | -16.24       | -36.91       | -46.67       |
| Colchicine                                     | 399.4        | A natural product that is used as a medication used for gout | -19.42       | -13.14       | -37.24       | -45.17       |

|                                          |              |                                                                                                                        |              |              |              |              |
|------------------------------------------|--------------|------------------------------------------------------------------------------------------------------------------------|--------------|--------------|--------------|--------------|
| <b>Colistimethate Na</b>                 | 1749.8       | Antibiotic                                                                                                             | -6.71        | -12.31       | -13.98       | -23.08       |
| <b>Colistin Sulfate</b>                  | 1267.6       | Antibiotic; Antibacterial                                                                                              | -7.98        | -11.22       | -0.56        | -4.65        |
| <b>Cortisone Acetate</b>                 | 402.5        | Anti-inflammatory;<br>Corticosteroid                                                                                   | -44.75       | -31.34       | -43.61       | -49.25       |
| <b>Cyclobenzaprine HCl</b>               | 311.8        | Muscle relaxant                                                                                                        | -20.21       | -20.89       | -27.58       | -33.55       |
| <b>Cyclopentolate</b>                    | 291.4        | Mydriatic                                                                                                              | -43.83       | -23.95       | -57.23       | -66.83       |
| <b>Cycloserine</b>                       | 102.1        | Antibiotic                                                                                                             | -25.33       | -26.91       | -47.73       | -60.82       |
| <b>Cysteamine HCl</b>                    | 113.6        | Radiation-protective agent;<br>Nephropathic cystinosis<br>therapy.                                                     | -32.32       | -25.41       | -48.81       | -62.78       |
| <b>Dactinomycin (= Actinomycin D)</b>    | 1255.4       | Antineoplastic                                                                                                         | 3.41         | -0.32        | -19.87       | -27.54       |
| <b>Dalfampridine (4-Aminopyridine)</b>   | 94.1         | Multiple sclerosis and<br>Lambert-Eaton myasthenic<br>syndrome treatment                                               | -20.21       | -31.11       | -37.89       | -48.99       |
| <b>Dantrolene Na</b>                     | 336.2        | Muscle relaxant                                                                                                        | -23.79       | -43.70       | -20.73       | -31.06       |
| <b>Dapsone</b>                           | 248.3        | Antibacterial (against<br>Mycobacterium leprae)                                                                        | -14.89       | -16.10       | -21.01       | -34.38       |
| <b>Daptomycin</b>                        | 1620.7       | Antibiotic                                                                                                             | -31.09       | -22.12       | -54.83       | -53.45       |
| <b>Darifenacin HBr</b>                   | 507.5        | Overactive bladder and<br>urinary incontinence<br>treatment                                                            | 3.13         | -0.91        | -17.95       | -30.12       |
| <b>Darunavir</b>                         | 547.7        | Antiviral                                                                                                              | 86.03        | 83.90        | -8.52        | -8.46        |
| <b>Dasatinib</b>                         | 488          | Antineoplastic                                                                                                         | 32.95        | 33.81        | 79.22        | 77.23        |
| <b>Decitabine</b>                        | 228.2        | Treatment of myelodysplastic<br>syndromes (MDS)                                                                        | -28.39       | -31.38       | -51.57       | -60.32       |
| <b>Deferasirox</b>                       | 373.4        | Rationally designed iron<br>chelator                                                                                   | -23.63       | -27.82       | -41.53       | -50.31       |
| <b>Deferoxamine Mesylate</b>             | 656.8        | Iron chelator used in iron<br>poisoning                                                                                | -27.91       | -26.82       | -37.24       | -49.90       |
| <b>Demeclocycline HCl</b>                | 501.3        | Antibiotic                                                                                                             | -14.10       | -20.12       | -29.53       | -48.29       |
| <b>Desipramine HCl</b>                   | 302.8        | Antidepressant                                                                                                         | -5.52        | -21.76       | -12.14       | -8.70        |
| <b>Desogestrel</b>                       | 310.5        | Contraceptive                                                                                                          | 63.67        | 68.25        | 91.20        | 92.22        |
| <b>Desonide</b>                          | 416.5        | Anti-inflammatory;<br>Corticosteroid                                                                                   | 3.33         | 2.97         | -13.90       | -15.01       |
| <b>Desoximetasone</b>                    | 376.5        | Anti-inflammatory;<br>Glucocorticoid                                                                                   | -48.24       | -40.92       | 32.30        | 26.58        |
| <b>Desvenlafaxine Succinate Hydrate</b>  | 399.5        | Antidepressant                                                                                                         | -27.08       | -26.78       | -52.71       | -64.10       |
| <b>Dexchlorpheniramine Maleate</b>       | 390.9        | Antihistamine; antiallergic                                                                                            | -30.57       | -28.42       | -50.48       | -63.72       |
| <b>Dexmedetomidine HCl</b>               | <b>236.7</b> | <b>Sedative</b>                                                                                                        | <b>86.50</b> | <b>86.95</b> | <b>89.00</b> | <b>88.09</b> |
| <b>Dexrazoxane</b>                       | 268.3        | Cardioprotective agent                                                                                                 | -26.60       | -20.94       | -19.16       | -30.12       |
| <b>Diatrizoate Meglumine</b>             | 809.1        | Radiocontrast agent                                                                                                    | -21.52       | -18.88       | -43.43       | -43.12       |
| <b>Diazepam</b>                          | 284.7        | Anti-anxiety agent; Hypnotic<br>and Sedative                                                                           | -18.39       | -26.23       | -9.78        | -11.90       |
| <b>Dicloxacillin Na Salt Monohydrate</b> | 510.3        | Antibiotic                                                                                                             | -1.63        | -16.97       | -24.83       | -31.79       |
| <b>Dicyclomine HCl</b>                   | 345.9        | Antispasmodic; Intestinal<br>hypermotility treatment;<br>relieves the symptoms of<br>Irritable Bowel Syndrome<br>(IBS) | -3.10        | -4.83        | -43.10       | -37.75       |
| <b>Dienogest</b>                         | 311.4        | Contraceptive                                                                                                          | -61.26       | -64.59       | -36.12       | -39.31       |
| <b>Diffmaprednate</b>                    | 508.6        | Corticosteroid; Anti-<br>inflammatory                                                                                  | 16.55        | 2.38         | 23.96        | 28.13        |
| <b>Digoxin</b>                           | 780.9        | Antiarrhythmic; Cardiotonic                                                                                            | -29.62       | -29.28       | -44.85       | -62.61       |

|                                   |       |                                                                                  |        |        |        |        |
|-----------------------------------|-------|----------------------------------------------------------------------------------|--------|--------|--------|--------|
| <b>Dimenhydrinate</b>             | 470   | Nausea and motion sickness treatment                                             | -26.72 | -22.72 | -43.99 | -53.68 |
| <b>Disopyramide</b>               | 339.5 | Antiarrhythmic                                                                   | -20.53 | -26.78 | -40.45 | -46.17 |
| <b>Dopamine HCl</b>               | 189.6 | Catecholamine neurotransmitter                                                   | -20.21 | -32.34 | -35.44 | -45.29 |
| <b>Doripenem</b>                  | 420.5 | Ultra-broad spectrum antibiotic                                                  | -10.25 | -24.49 | -31.40 | -41.68 |
| <b>Doxapram HCl H2O</b>           | 433   | Respiratory stimulant                                                            | -13.86 | -16.47 | -29.25 | -39.42 |
| <b>Doxepin HCl</b>                | 315.8 | Psychotropic Agent with Tricyclic Antidepressant and Anxiolytic Properties       | -26.45 | -25.09 | -34.20 | -40.45 |
| <b>Droperidol</b>                 | 379.4 | Sedative/Anti-nausea/Anesthesia Adjunct                                          | -12.87 | -19.29 | 1.74   | -7.52  |
| <b>Drospirenone</b>               | 366.5 | Contraceptive                                                                    | -28.95 | -43.06 | -4.25  | -2.89  |
| <b>Duloxetine HCl</b>             | 333.9 | Antidepressant                                                                   | -4.29  | -0.68  | -1.27  | -11.69 |
| <b>Dutasteride</b>                | 528.5 | Treatment of benign prostatic hyperplasia (BPH) and male pattern baldness (MPB). | -0.40  | -3.46  | -19.85 | -33.29 |
| <b>Dyphylline</b>                 | 254.2 | Antiasthmatic                                                                    | -28.43 | -24.81 | -36.30 | -51.72 |
| <b>Econazole Nitrate</b>          | 444.7 | Antifungal                                                                       | 97.30  | 97.76  | 97.12  | 97.24  |
| <b>Eflornithine HCl</b>           | 218.6 | Facial hirsutism and African trypanosomiasis (sleeping sickness) treatment       | -23.55 | -21.44 | -32.79 | -38.66 |
| <b>Epinastine HCl</b>             | 285.8 | Antiallergic; Antihistamine; Mast cell stabilizer                                | -20.81 | -26.00 | -19.29 | -30.41 |
| <b>Epirubicin HCl</b>             | 580   | Antineoplastic                                                                   | 10.56  | 13.51  | 30.38  | 29.75  |
| <b>Eplerenone</b>                 | 414.5 | Potassium-sparing diuretic; Antihypertensive                                     | -20.09 | -15.10 | -29.12 | -36.49 |
| <b>Eptifibatide</b>               | 832   | Antiplatelet; anticoagulant                                                      | -21.20 | -12.77 | -35.32 | -45.50 |
| <b>Erythromycin</b>               | 733.9 | Macrolide antibiotic                                                             | -0.40  | -3.05  | -36.93 | -46.11 |
| <b>Estramustine Phosphate Na</b>  | 566.4 | Antineoplastic                                                                   | -25.93 | -12.22 | -20.63 | -21.11 |
| <b>Estropipate</b>                | 436.6 | Hormonal replacement; Antineoplastic                                             | -8.02  | -12.68 | -23.46 | -29.18 |
| <b>Eszopiclone</b>                | 388.8 | Nonbenzodiazepine hypnotic                                                       | -24.62 | -18.06 | -28.97 | -30.30 |
| <b>Ethambutol Dihydrochloride</b> | 277.2 | Bacteriostatic; antimycobacterial                                                | -14.50 | -19.75 | -25.61 | -27.39 |
| <b>Ethinyl Estradiol</b>          | 296.4 | Contraceptive                                                                    | 53.71  | 58.12  | 85.01  | 84.27  |
| <b>Ethionamide</b>                | 166.2 | Antibiotic; antimycobacterial                                                    | -9.26  | -10.72 | -50.13 | -42.89 |
| <b>Ethosuximide</b>               | 141.2 | Anticonvulsant                                                                   | -21.28 | -9.58  | -49.85 | -48.87 |
| <b>Etodolac</b>                   | 287.4 | Nonsteroidal anti-inflammatory                                                   | -15.53 | -9.85  | -45.78 | -48.11 |
| <b>Etomidate</b>                  | 244.3 | General anaesthetic; sedative                                                    | 77.21  | 80.43  | -4.48  | -7.20  |
| <b>Etonogestrel</b>               | 324.5 | Hormonal contraceptive                                                           | 45.77  | 45.44  | 86.68  | 85.18  |
| <b>Everolimus</b>                 | 958.2 | Immunosuppressant                                                                | 79.12  | 81.71  | 73.41  | 73.65  |
| <b>Ezetimibe</b>                  | 409.4 | Hypercholesterolemia                                                             | 56.21  | 55.11  | 90.60  | 91.61  |
| <b>Febuxostat</b>                 | 316.4 | Hyperuricemia and gout treatment                                                 | -10.96 | 4.06   | -12.67 | -18.85 |
| <b>Fexofenadine HCl</b>           | 538.1 | Antihistamine                                                                    | -7.27  | 3.74   | -23.69 | -27.92 |
| <b>Fingolimod</b>                 | 307.5 | Immunomodulator approved for treating multiple sclerosis.                        | 59.03  | 65.69  | 67.11  | 63.90  |
| <b>Flavoxate HCl</b>              | 427.9 | Muscle relaxant                                                                  | -18.62 | -16.28 | 1.24   | -0.74  |
| <b>Flucytosine</b>                | 129.1 | Antimycotic                                                                      | -35.18 | -19.07 | -55.61 | -59.99 |
| <b>Fludarabine Phosphate</b>      | 365.2 | Antineoplastic; immunosuppressant                                                | -34.58 | -23.13 | -55.94 | -59.47 |



|                                                                    |              |                                                                                  |              |              |              |              |
|--------------------------------------------------------------------|--------------|----------------------------------------------------------------------------------|--------------|--------------|--------------|--------------|
| <b>Fludrocortisone Acetate</b>                                     | 422.5        | Hormonal replacement for aldosterone (in adrenal insufficiency and salt wasting) | -39.90       | -26.05       | -34.00       | -46.61       |
| <b>Flunisolide</b>                                                 | 434.5        | Anti-inflammatory                                                                | 26.28        | 22.63        | 63.78        | 66.05        |
| <b>Fluocinonide</b>                                                | 494.5        | Anti-inflammatory                                                                | 13.06        | 8.31         | 78.24        | 73.47        |
| <b>Fluorometholone</b>                                             | 376.5        | Anti-inflammatory                                                                | 61.37        | 65.38        | -7.79        | -21.61       |
| <b>Flurandrenolide</b>                                             | 436.5        | Anti-inflammatory                                                                | -6.40        | -13.41       | -26.24       | -33.79       |
| <b>Fluticasone Propionate</b>                                      | 500.6        | Anti-asthma and anti-allergy (rhinitis)                                          | 57.32        | 63.46        | 42.87        | 28.89        |
| <b>Fluvoxamine Maleate</b>                                         | 434.4        | Antidepressant                                                                   | -13.98       | -12.54       | -34.18       | -32.73       |
| <b>Fomepizole</b>                                                  | 82.1         | Antidote in confirmed or suspected methanol or ethylene glycol poisoning         | -27.52       | -22.90       | -44.62       | -55.01       |
| <b>Formoterol</b>                                                  | 344.4        | Antiasthmatic; Bronchodilator                                                    | -23.07       | -28.74       | -57.16       | -61.90       |
| <b>Foscarnet Na (Sodium Phosphonoformate Tribasic Hexahydrate)</b> | 300          | Antiviral                                                                        | -33.15       | -32.39       | -51.52       | -63.63       |
| <b>Fosfomycin Calcium</b>                                          | 178.1        | Broad-spectrum antibiotic; Anti-Bacterial                                        | -25.37       | -21.16       | -47.65       | -58.17       |
| <b>Fosphenytoin Na Pentahydrate</b>                                | 496.3        | Antiepileptic                                                                    | -24.22       | -32.39       | -44.39       | -57.06       |
| <b>Gemifloxacin</b>                                                | 389.4        | Antibiotic                                                                       | -30.18       | -20.57       | -33.90       | -48.55       |
| <b>Glycopyrrolate Iodide</b>                                       | 445.3        | Adjuvant; Anesthetic                                                             | -10.80       | -22.99       | -39.46       | -46.35       |
| <b>Griseofulvin</b>                                                | 352.8        | Antifungal                                                                       | -8.38        | -20.12       | -19.90       | -26.92       |
| <b>Guanidine HCl</b>                                               | 95.5         | Myasthenia treatment                                                             | -23.19       | -17.83       | -25.63       | -29.30       |
| <b>Halcinonide</b>                                                 | 455          | Anti-inflammatory                                                                | -17.51       | -19.57       | 78.39        | 75.23        |
| <b>Halobetasol Propionate</b>                                      | 485          | Vasoconstrictor; Anti-inflammatory                                               | -18.78       | -32.75       | -48.59       | -57.21       |
| <b>Hexachlorophene</b>                                             | <b>406.9</b> | <b>Antiseptic; bacteriostatic</b>                                                | <b>98.69</b> | <b>98.45</b> | <b>94.87</b> | <b>96.10</b> |
| <b>Homatropine Methylbromide</b>                                   | 370.3        | Anti-Ulcer; Antispasmodic                                                        | -27.20       | -29.83       | -42.06       | -52.86       |
| <b>Hydralazine HCl</b>                                             | 196.6        | Muscle relaxant                                                                  | -24.86       | -23.45       | -5.01        | -11.72       |
| <b>Hydrochlorothiazide</b>                                         | 297.7        | Antihypertensive; Diuretic                                                       | -19.06       | -26.14       | -44.26       | -50.75       |
| <b>Hydroflumethiazide</b>                                          | 331.3        | Antihypertensive; Diuretic                                                       | -22.87       | -29.74       | -39.97       | -49.75       |
| <b>Hydroxocobalamin HCl</b>                                        | 1383.8       | Anti-anemic; Hematinic                                                           | -16.48       | -15.05       | -26.87       | -32.32       |
| <b>Hydroxychloroquine Sulfate</b>                                  | 434          | Antirheumatic Agent; Antimalarial                                                | -12.35       | -22.94       | -29.32       | -40.68       |
| <b>Hydroxyurea</b>                                                 | 76.1         | Antineoplastic                                                                   | -15.17       | -23.26       | -26.59       | -25.54       |
| <b>Hydroxyzine Dihydrochloride</b>                                 | 447.8        | Antihistamine (1st Generation)/Antiemetic/Hypnotic/Mild Anxiolytic               | -22.48       | -13.50       | -36.78       | -48.26       |
| <b>Ibutilide Fumarate</b>                                          | 500.7        | Class III antiarrhythmic                                                         | -16.84       | -18.15       | -48.18       | -49.37       |
| <b>Iloperidone</b>                                                 | <b>426.5</b> | <b>Antipsychotic</b>                                                             | <b>90.91</b> | <b>92.15</b> | <b>85.29</b> | <b>84.86</b> |
| <b>Indinavir</b>                                                   | 613.8        | Antiviral; Anti-HIV Agent                                                        | 91.94        | 90.24        | 40.04        | 41.28        |
| <b>Irbesartan</b>                                                  | 428.5        | Antihypertensive                                                                 | -8.90        | -8.12        | -24.83       | -32.09       |
| <b>Irinotecan HCl</b>                                              | 623.1        | Antineoplastic; Colon cancer treatment.                                          | -24.74       | -15.64       | -37.97       | -50.96       |
| <b>Isocarboxazid</b>                                               | 231.3        | Antidepressant and anxiolytic                                                    | -10.21       | -20.43       | -36.60       | -46.20       |
| <b>Isosorbide Dinitrate</b>                                        | 236.1        | Vasodilator used in the treatment of angina pectoris                             | -20.49       | -22.53       | -38.55       | -37.98       |
| <b>Isotretinoin (13-Cis-Retinoic Acid)</b>                         | 300.4        | Antineoplastic; Cystic acne treatment                                            | 43.15        | 43.43        | 90.29        | 91.46        |
| <b>Isradipine</b>                                                  | 371.4        | Antihypertensive                                                                 | 71.61        | 75.82        | 80.54        | 75.97        |

|                                        |       |                                                                                        |        |        |        |        |
|----------------------------------------|-------|----------------------------------------------------------------------------------------|--------|--------|--------|--------|
| <b>Kanamycin Sulfate</b>               | 582.6 | Antibiotic                                                                             | -31.01 | -34.53 | -50.63 | -52.16 |
| <b>Ketorolac Tromethamine</b>          | 376.4 | Anti-inflammatory (NSAID)                                                              | -9.26  | -9.81  | 17.97  | 17.71  |
| <b>Labetalol HCl</b>                   | 364.9 | Antihypertensive                                                                       | -27.48 | -31.47 | -50.13 | -57.97 |
| <b>Lacosamide</b>                      | 250.3 | Adjunctive treatment of partial-onset seizures and diabetic neuropathic pain           | -30.14 | -23.63 | -46.97 | -57.44 |
| <b>Lactulose</b>                       | 342.3 | Gastrointestinal Agent                                                                 | -26.76 | -26.32 | -46.39 | -54.80 |
| <b>Lamivudine</b>                      | 229.3 | Antiviral                                                                              | -27.48 | -33.16 | -38.70 | -49.52 |
| <b>Lansoprazole</b>                    | 369.4 | Antiulcer                                                                              | 49.30  | 50.87  | 80.06  | 78.20  |
| <b>Lenalidomide</b>                    | 259.3 | Multiple myeloma treatment                                                             | -17.43 | -22.21 | -34.84 | -40.60 |
| <b>Leucovorin Calcium Pentahydrate</b> | 601.6 | Helps eliminate methotexate toxicity without compromising the antitumor effect         | -15.17 | -23.03 | -32.71 | -36.99 |
| <b>Levalbuterol HCl</b>                | 275.8 | Bronchodilator; antiasthmatic                                                          | -15.05 | -20.57 | -21.56 | -25.78 |
| <b>Levobunolol HCl</b>                 | 327.9 | Glaucoma treatment                                                                     | -30.42 | -29.65 | -51.34 | -56.09 |
| <b>Levocarnitine</b>                   | 161.2 | Gastric and pancreatic stimulant; hyperlipoproteinemia treatment                       | -28.19 | -31.75 | -49.47 | -59.79 |
| <b>Levocetirizine Dihydrochloride</b>  | 461.8 | Antihistamine                                                                          | -25.93 | -28.65 | -50.99 | -67.21 |
| <b>Levothyroxine Na</b>                | 798.9 | Antithyroid Agent                                                                      | 15.56  | 10.18  | 88.70  | 86.41  |
| <b>Lindane</b>                         | 290.8 | Scabicide and pediculicide                                                             | 11.03  | 13.60  | -32.31 | -46.20 |
| <b>Liothyronine Na</b>                 | 673   | Hormone Replacement Agent                                                              | -4.69  | -8.89  | 93.28  | 93.95  |
| <b>Lopinavir</b>                       | 628.8 | Antiviral; Anti-HIV Agent                                                              | 81.30  | 77.65  | 81.80  | 77.96  |
| <b>Lorazepam</b>                       | 321.2 | Anti-anxiety agent; Hypnotic and Sedative                                              | -31.29 | -23.67 | -14.28 | -18.47 |
| <b>Loteprednol Etabonate</b>           | 467   | Anti-inflammatory; Anti-Allergic                                                       | 34.26  | 29.47  | 39.05  | 39.14  |
| <b>Loxapine Succinate</b>              | 445.9 | Antipsychotic                                                                          | -13.11 | -13.41 | 16.73  | 21.56  |
| <b>Mafenide HCl</b>                    | 222.7 | Bacteriostatic sulfonamide; Adjuvant treatment for secondary and tertiary burns.       | -12.51 | -15.42 | -27.93 | -37.07 |
| <b>Malathion</b>                       | 330.4 | Lice treatment                                                                         | 77.69  | 76.96  | 37.66  | 41.63  |
| <b>Mannitol</b>                        | 182.2 | Osmotic diuretic; Sweetener                                                            | -15.61 | -12.68 | -34.94 | -39.45 |
| <b>Maraviroc</b>                       | 513.7 | Antiviral; Anti-HIV Agent                                                              | -8.30  | -11.54 | -36.43 | -41.54 |
| <b>Mechlorethamine HCl</b>             | 192.5 | Antineoplastic; vesicant and necrotizing irritant destructive to mucous membranes      | -18.62 | -13.04 | -25.15 | -39.48 |
| <b>Meclizine Dihydrochloride</b>       | 463.9 | Antiemetic; Anti-Allergic                                                              | 14.37  | 20.35  | 72.50  | 70.57  |
| <b>Meclofenamate Na</b>                | 318.1 | Non-steroidal anti-inflammatory agent with antipyretic and antigranulation activities. | -14.65 | -15.05 | -29.25 | -24.37 |
| <b>Mefloquine HCl</b>                  | 414.8 | Antimalarial                                                                           | 16.51  | 17.66  | 11.35  | 8.62   |
| <b>Mepenzolate Bromide</b>             | 420.3 | Antiulcer                                                                              | -10.57 | -6.16  | -17.29 | -23.46 |
| <b>Mepivacaine HCl</b>                 | 282.8 | Anesthetic                                                                             | -0.96  | -2.60  | -6.45  | -12.72 |

**Table S4: Primer sequences used for quantitative real-time PCR from murine tissue.**

| <b>Gene</b> | <b>Forward</b>              | <b>Reverse</b>               | <b>Ref.</b> |
|-------------|-----------------------------|------------------------------|-------------|
| CYP2C29     | 5'GCCTCAAAGCCTACTGTCA-3'    | 5'- AACGCCAAAACCTTTAATC-3'   | (1)         |
| CYP2C37     | 5'-ATACTCTATATTTGGGCAGG-3'  | 5'- GTTCCTCCACAAGGCAAC-3'    | (1)         |
| CYP2C38     | 5'-TTGCCTTCTGTAATCCCC-3'    | 5'-TCTAACGCAGGAATGGATAAAC-3' | (2)         |
| CYP2C39     | 5'-GGAGACAGAGCTGTGGC-3'     | 5'-TAAAAACAATGCCAAGGCCG-3'   | (1)         |
| CYP2C44     | 5'-CTTTCCAACGAGCGATTCCC-3'  | 5'-TGTTTCTCCTCCTCGATCTTGC-3' | (3)         |
| CYP2J6      | 5'-GGAGACAACAATGATTAGTC-3'  | 5'-CTATCAGCAAGTCTTGCTGC-3'   | (4)         |
| CYP3A11     | 5'-GACAAACAAGCAGGGATGGAC-3' | 5'- CCAAGCTGATTGCTAGGAGCA-3' | (5)         |

## **Supplementary methods:**

### **Behavioural Tests**

For the dynamic cold plate test, mice were put on a metal plate. The plate temperature changed gradually from 25°C to 0°C with a rate of 12°C/min. The time until jumping or nocifensive responses of the hind paw occurred was measured and the cut-off time was set to 200s. For the acetone test, a drop of acetone was applied on the mid plantar area of the hind paw and the time of nocifensive responses, such as shaking, flinching and licking was measured (6).

For the determination of mechanical or thermal hypersensitivity, mice were kept in test cages on an elevated grid for at least 2 h to allow accommodation. Baseline measurements were performed using a Dynamic Plantar Aesthesiometer or a Hargreaves

Apparatus (Ugo Basile, Comerio, VA, Italy) detecting withdrawal latency of the hind paws after mechanical stimulation. Paw withdrawal latencies (PWL) were determined in seconds (s)  $\pm$  0.1 with a cut-off time of 20 s. The non-injected and injected paws were measured alternately in intervals of 5-10 min. For all behavioral tests the investigator was blinded for treatment or genotype of the mice.

### **Determination of lipidomic profiles by liquid chromatography-tandem mass spectrometry (LC-MS/MS)**

Stock solutions with 2500 ng/ml of all analytes were prepared in methanol. Working standards were obtained by further dilution with a concentration range of 0.1-250 ng/ml for leukotrienes, HETEs, prostanoids, EETs, EpOMEs and DiHOMEs and HODEs. Sample extraction was performed with liquid-liquid-extraction. Therefore, tissue or cell culture medium was extracted twice with 600  $\mu$ l ethyl acetate. The combined organic phases were removed at a temperature of 45° C under a gentle stream of nitrogen. The residues were reconstituted with 50  $\mu$ l of methanol/water/ (50:50, v/v), centrifuged for 2 min at 10,000xg and then transferred to glass vials (Macherey-Nagel, Düren, Germany) prior to injection into the LC-MS/MS system.

To measure endocannabinoid/endovanilloid concentrations, the deuterated substances AEA-d8, PEA-d5, OEA-d2, 1-AG-d5 2-AG-d5, 1-OG-d5 and NADA-d8 were used as internal standards. 2 cycles of ethylacetate extraction were performed. 50  $\mu$ l ethylacetate were added to the tissue sample and the sample was homogenized using a swing mill (Retsch, Haan, Germany; 25 Hz for 2.5 minutes). After centrifugation (3 min, 20,238 g) the organic phase was removed and the extraction was repeated with 150  $\mu$ l of

ethylacetate. The two ethylacetate fractions were combined and evaporated at a temperature of 45 °C under a gentle stream of nitrogen and frozen at -80 °C till the day of measurement. The residues were reconstituted in 50 µl of acetonitrile and centrifuged for 3 min at 20,238 g. The residues were transferred in glass vials and 10 µl were injected into the LC-MS/MS system as described previously in more detail (7).

#### *Instrumentation for lipid measurement*

The LC-MS/MS system consisted of a QTrap 5500 (AB Sciex, Darmstadt, Germany) equipped with a Turbo-V source operating in negative electrospray ionization mode, an Agilent 1200 binary HPLC pump and degasser (Agilent, Waldbronn, Germany), and an HTC Pal autosampler (CTC analytics, Zwingen, Switzerland). High-purity nitrogen for the mass spectrometer was produced by a NGM 22-LC-MS nitrogen generator (cmc Instruments, Eschborn, Germany).

For the chromatographic separation of EETs, endocannabinoids and leukotrienes, Gemini NX C18 column and precolumn (150 x 2 mm inner diameter, 5 µm particle size, and 110 Å pore size; Phenomenex, Aschaffenburg, Germany) or a Luna C18-column (150 mm Lx2 mm ID, 5 µm particle size, Phenomenex, Aschaffenburg, Germany) were used. A linear gradient was used at a flow rate of 0.5 ml/min with a total run time of 17.5 min. Mobile phase A consist of water: ammonia (100:0.05, v/v), and mobile phase B of acetonitrile:ammonia (100:0.05, v/v). The gradient changed from 85% A to 10% within 12 min. These conditions were held for 1 min. Then, the mobile phase shifted back to 85% A within 0.5 min and it was maintained for 4 min to reequilibrate the column. For the chromatographic separation of prostanoids, a Synergi 4u Hydro-RP column (150 x 2 mm inner diameter, 4 µm, Phenomenex, Aschaffenburg, Germany) and a precolumn

of same material were used. Chromatographic separation was carried out in gradient elution mode at a flow rate of 0.3 ml/min. Total run time was 16 min. Mobile phase A consisted of water/formic acid (100:0.0025, v/v), and mobile phase B of acetonitrile/formic acid (100:0.0025, v/v). The linear gradient started with 90% A for 1 min and then changed to 60% A within 1 min. It was held for 1 min at 60% in phase A. Within 1min, the mobile phase shifted to 50% in phase A and was held for 2 min. Within 2 min, the mobile phase shifted to 10% A and was held for 1 min. Composition of the gradient shifted back to 90% A in one min and it was maintained for 6 min to re-equilibrate the column. A volume of 20  $\mu$ l (EETs, leukotrienes) or 45  $\mu$ l (prostanoids) of the extracted samples were injected into the LC-MS/MS system. Quantification was performed with Analyst software version 1.5 (Applied Biosystems) using the internal standard method (isotope-dilution mass spectrometry). Ratios of analyte peak area and internal standard area (y-axis) were plotted against concentration (x-axis), and calibration curves were calculated by least-squares regression with 1/square concentration weighting.

### **Calcium-imaging setup**

Cells were illuminated by an UV light source (Xenon lamp, 75 watts, Nikon, NY, USA), 340 nm and 380 nm excitation alternated by a LEP MAC 5000 filter wheel (Spectra services, NY, USA), and fluorescence emission captured by Cool SNAP ES camera (Princeton Instruments, NJ, USA) or a Leica DFC360 FX.340/380 ratiometric images were processed, background corrected, and analyzed with IPLab software (Scientific Analytics, CA, USA).

## **Patch clamp recordings from spinal cord slices and DRG neurons**

The slices were perfused with Krebs's solution (8-10 ml/min) that was saturated with 95% O<sub>2</sub> and 5% CO<sub>2</sub> at 26°C for at least 1-3h prior to experiment. The Krebs's solution contains (in mM): NaCl [11]7, KCl [3.6], CaCl<sub>2</sub> [2.5], MgCl<sub>2</sub> 1.2, NaH<sub>2</sub>PO<sub>4</sub> [1.2], NaHCO<sub>3</sub> [25], and glucose [11]. The whole-cell patch-clamp recordings were made from lamina II neurons in voltage-clamp mode. Under a dissecting microscope with transmitted illumination, the substantia gelatinosa (lamina II) is clearly visible as a relatively translucent band across the dorsal horn. Patch pipettes were fabricated from thin-walled, borosilicate, glass-capillary tubing (1.5 mm outer diameter; World Precision Instruments).. The resistance of a typical patch pipette is 5–10 MΩ. The internal solution contained the following (in mM): [135] potassium gluconate, [5] KCl, [0.5] CaCl<sub>2</sub>, [2] MgCl<sub>2</sub>, [5] EGTA, [5] HEPES, and [5] ATP-Mg. Membrane currents were amplified with an Axopatch 200A amplifier (Molecular Devices) in voltage-clamp mode. Signals were filtered at 2 kHz and digitized at 5 kHz. Data were stored with a personal computer using pClamp 6 software and analyzed with Mini Analysis (Synaptosoft). Those cells that showed >5% changes from the baseline levels were regarded as responding ones.

Whole-cell patch clamp recordings were conducted in small-diameter (18-25 μm) neurons at room temperature (25 °C) using an Axopatch-200B amplifier (Axon Instruments). The patch pipettes were pulled from borosilicate capillaries (World Precision Instruments, Inc.). Pipette resistance was 4-6 MΩ for recording, and the internal solution contains (in mM): 126 K-gluconate, 10 NaCl, 1 MgCl<sub>2</sub>, 10 EGTA, 2 NaATP, and 0.1 MgGTP, adjusted to pH 7.3 with KOH and osmolality 295-300 mOsm. The recordings were performed in an extracellular solution that contains (in mM): 140 NaCl, 5 KCl, 1 MgCl<sub>2</sub>, 10 HEPES, 10 glucose, adjusted

to pH 7.4 with NaOH and osmolality 300-310 mOsm. To record the inward currents induced by telmisartan (10  $\mu$ M), capsaicin (200 nM), AITC (75  $\mu$ M) or GSK1016790A (1  $\mu$ M), voltage clamp was conducted at holding membrane potential of  $-60$  mV. The inward currents were low-pass filtered at 1 kHz, and were digitized at a sampling rate of 5 kHz with Digidata 1322A (Axon Instruments). The pClamp10 (Axon Instruments) software was used during recordings and data analysis.

### Supplementary references

1. Luo G, Zeldin DC, Blaisdell JA, Hodgson E, & Goldstein JA (1998) Cloning and expression of murine CYP2Cs and their ability to metabolize arachidonic acid. *Arch Biochem Biophys* 357(1):45-57.
2. Zhang QY, Dunbar D, & Kaminsky LS (2003) Characterization of mouse small intestinal cytochrome P450 expression. *Drug metabolism and disposition: the biological fate of chemicals* 31(11):1346-1351.
3. DeLozier TC, *et al.* (2004) CYP2C44, a new murine CYP2C that metabolizes arachidonic acid to unique stereospecific products. *The Journal of pharmacology and experimental therapeutics* 310(3):845-854.
4. Choudhary D, Jansson I, Schenkman JB, Sarfarazi M, & Stoilov I (2003) Comparative expression profiling of 40 mouse cytochrome P450 genes in embryonic and adult tissues. *Arch Biochem Biophys* 414(1):91-100.
5. Forster AB, Reeh PW, Messlinger K, & Fischer MJ (2009) High concentrations of morphine sensitize and activate mouse dorsal root ganglia via TRPV1 and TRPA1 receptors. *Mol Pain* 5(1):17.
6. Allchorne AJ, Broom DC, & Woolf CJ (2005) Detection of cold pain, cold allodynia and cold hyperalgesia in freely behaving rats. *Mol Pain* 1:36.
7. Bishay P, *et al.* (2010) R-flurbiprofen reduces neuropathic pain in rodents by restoring endogenous cannabinoids. *PLoS One* 5(5):e10628.
